# Supplementary material for: New boro amino amide organocatalysts for asymmetric cross aldol reaction of ketones with carbonyl compounds
Source: Royal Society of Chemistry journal article supplement (doi:10.1039/d2ra06272k), 2023-01-01
Supplement: d2ra06272k1.pdf [file d2ra06272k1.pdf]

## Supporting Information

### **New boro amino amide organocatalysts for asymmetric cross Aldol reaction of ketones with carbonyl compounds**

Zubeda Begum,<sup>a</sup> Chigusa Seki,<sup>a</sup> Yuko Okuyama,<sup>b</sup> Eunsang Kwon,<sup>c</sup> Koji Uwai,<sup>a</sup> Michio Tokiwa,<sup>d</sup> Suguru Tokiwa,<sup>d</sup> Mitsuhiro Takeshita,<sup>d</sup> and Hiroto Nakano<sup>a</sup>

<sup>a</sup> Division of Sustainable and Environmental Engineering, Graduate School of Engineering, Muroran Institute of Technology, 27-1 Mizumoto-cho, Muroran 050-8585, Japan.

E-mail: [catanaka@mmm.muroran-it.ac.jp](mailto:catanaka@mmm.muroran-it.ac.jp)

<sup>b</sup>Tohoku Medical and Pharmaceutical University, 4-4-1 Komatsushima, Aoba-ku, Sendai 981-8558, Japan

<sup>c</sup>Research and Analytical Centre for Giant Molecules, Graduate School of Sciences, Tohoku University 6-3 Aoba, Aramaki, Aoba-ku, Sendai 980-8578, Japan.

<sup>d</sup>Tokiwakai Group, 62 Numajiri, Tsuduri-chou Uchigo, Iwaki 973-8053, Japan.

# CONTENTS

|                                                                                                 | <b>Pages</b> |
|-------------------------------------------------------------------------------------------------|--------------|
| <b>1. General information</b>                                                                   | <b>2</b>     |
| <b>2. Experimental Procedure</b>                                                                | <b>3-4</b>   |
| <b>3. Experimental data</b>                                                                     | <b>5-11</b>  |
| <b>4. <math>^1\text{H}</math> &amp; <math>^{13}\text{C}</math> NMR spectra of the catalysts</b> | <b>12-26</b> |
| <b>5. <math>^1\text{H}</math> &amp; Mass spectra of the aldol products</b>                      | <b>27-44</b> |
| <b>6. HPLC spectra of the aldol products</b>                                                    | <b>45-62</b> |
| <b>7. Theoretical Calculations</b>                                                              | <b>63-73</b> |

## 1. General Information

Reagents and dry solvents were of the commercially available maximum grade and used without further purification. Reactions were performed out under an inert atmosphere in flame dried and cooled glassware. The reaction was monitored by thin layer chromatography (TLC) using Merck silica plate gel 60 F<sub>254</sub> aluminum sheet. Also, the purifications of products were confirmed using column chromatography techniques in silica gel 60 N (40–50 μm) purchased from Kanto Chemical Company. Visualization of the products was confirmed by ultraviolet light, iodine vapor and ninhydrin stain. <sup>1</sup>H and <sup>13</sup>C NMR spectra were recorded on a JEOL JNM-ECA500 (<sup>1</sup>H for 500 MHz and <sup>13</sup>C for 125 MHz). All spectra were recorded at 21 °C. Chemical shifts ( $\delta$ ) are reported in parts per million (ppm) relative to the signals of tetramethylsilane (TMS) using the residual solvents signals. Report data for <sup>1</sup>H NMR spectroscopy are reported as follows: chemical shift ( $\delta$  ppm), multiplicity (s = singlet, d = doublet, t = triplet, q = quadruplet, dd = doublet of doublets, td = triplet of doublets, m = multiplet and br = broad, coupling constants (J) and assimilation were measured in hertz (Hz). Optical rotation measured by JASCO DIP-360 polarimeter. The melting point were measured using a Yanaco micro melting point apparatus. High resolution mass spectra (HRMS) data were collected by electron impact (EI) using Hitachi RMG-GMG and JEOL JNK-DX303 sector instruments. The result values were determined for enantiomeric excess (*ee*) using high pressure liquid chromatography (HPLC) principle by DAICEL CHIRALPAK AD-H, OD-H, AS-H column.

## 2. Experimental procedure

### 2.1 General procedure for the synthesis of boro amino amide organocatalysts **4a**, **4b-g**, **4h**

To a solution of Fmoc-t-Leucine **1a**, *N*-Boc amino acids **1b-f**, *N*-Boc-L-Proline **1g** (1.0 mmol) respectively, HATU (1.2 mmol) and DIPEA (1.5 mmol) were added in dry DMF and stirred for 15min. The corresponding 2-pinacolyl boro phenyl amine **2a**, 2-pinenyl boro phenyl amine **2b** (1.0 mmol) respectively were added slowly and the reaction mixture was gradually allowed to stir from 0 °C to 30 °C until the reaction completion. After the reaction was completed, as monitored by TLC, reaction mixture was diluted with water, the crude products were extracted with CHCl<sub>3</sub>, dried over Na<sub>2</sub>SO<sub>4</sub> and concentrated under reduced pressure. The residue was purified by flash column chromatography to afford the corresponding *N*-protected boro amino amides **3a**, **3b-g**.

#### (**4a**)

To a solution of **3a** (1.0 mmol) in acetonitrile was added 20% piperidine in DMF (5V) at 0 °C and the reaction mixture was gradually allowed to stir from 0 °C to 30 °C until the reaction completion. After the reaction was completed, as monitored by TLC, the solvent was removed under a reduced pressure and the obtained residue was subjected to flash column chromatography to afford the compound **4a**.

#### (**4b-g**)

To a solution of **3b-g** in dry CH<sub>2</sub>Cl<sub>2</sub>, TFA was added dropwise over a period of times (v/v) at 0 °C and successively stirred at room temperature (r.t.) for 4 h. After the reaction completion, CH<sub>2</sub>Cl<sub>2</sub> and TFA were removed under a reduced pressure, the residue was basified by drop-wise addition of saturated NaHCO<sub>3</sub> solution at 0 °C and stirred for 1 hour at r.t.. The crude products were extracted with CHCl<sub>3</sub>, dried over Na<sub>2</sub>SO<sub>4</sub> and concentrated under reduced pressure. The residue was purified by flash column chromatography to afford the corresponding boro amino amides **4b-g**.

#### (**4h**)

To a solution of **4b** (1.0 mmol) in acetonitrile was added K<sub>2</sub>CO<sub>3</sub> (2.0 mmol) and methyl iodide (1.2

mmol) and the reaction was stirred at reflux condition until the reaction completion. After the reaction completion as monitored by T.L.C., the solvent was removed under a reduced pressure, the crude residue was diluted with water and extracted with  $\text{CHCl}_3$ , dried over  $\text{Na}_2\text{SO}_4$  and concentrated under reduced pressure. The residue was purified by flash column chromatography to afford the corresponding methylated boro amino amide **4h**.

## 2.2 General procedure for the asymmetric aldol reaction of various ketones with aromatic aldehydes

The boro amino amide catalyst **4b** (10 mol%) and benzoic acid (20 mol%) were added to a solution of ketones (0.4 mmol) and the aldehydes (0.1 mmol) under the sea water and tap water (1:1) as solvent reaction condition. The reaction mixture was stirred at 25 °C for appropriate time until the reaction completion, monitored by thin layer chromatography (TLC). The reaction mixture was directly purified by flash column chromatography on  $\text{SiO}_2$  (*n*-hexane/ $\text{CH}_3\text{CO}_2\text{Et}$ ) to afford the corresponding aldol products. The compounds are the known compounds and the structures were identified by spectral data which were in good agreement with those reported. The enantiomeric excess (*ee*) was determined using high pressure liquid chromatography (HPLC) principle by DAICEL CHIRALPAK AD-H, AS-H, OD-H columns.<sup>11</sup>

### 3. Experimental Data

#### (S)-2-AminoFmoc-N-(-pinacol phenyl boronate)-3,3-dimethylbutanamide (3a)

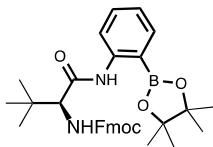

Colorless solid; 88% yield; mp 72-76 °C;  $[\alpha]_D^{20} = -35.80$  ( $c = 0.1$ ,  $\text{CHCl}_3$ ); IR (neat) 3362, 2972, 1614, 1581, 1447, 1351, 1140, 1119, 1072, 757  $\text{cm}^{-1}$ ;  $^1\text{H}$  NMR (500 MHz,  $\text{CDCl}_3$ , ppm):  $\delta$  9.55 (s, 1H), 8.52 (d,  $J = 8.6$  Hz, 1H), 7.80-7.70 (m, 4H), 7.64-7.54 (m, 2H), 7.51-7.45 (m, 1H), 7.42-7.35 (m, 2H), 7.33-7.27 (m, 1H), 7.13-7.05 (m, 1H), 5.71 (d,  $J = 5.7$  Hz, 1H), 4.47-4.39 (m, 1H), 4.38-4.29 (m, 1H), 4.27-4.20 (m, 1H), 4.02 (d,  $J = 9.2$  Hz, 1H), 1.36 (d,  $J = 5.1$  Hz, 12H), 1.07 (s, 9H);  $^{13}\text{C}$  NMR (125 MHz,  $\text{CDCl}_3$ , ppm):  $\delta$  169.2, 156.4, 143.9, 143.5, 141.7, 136.8, 136.6, 133.3, 132.9, 127.8, 127.1, 125.3, 123.3, 120.2, 118.8, 84.7, 66.9, 64.2, 46.4, 35.4, 26.9, 25.03, 25.0, 24.8. MS (EI)  $m/z$  : 554  $[\text{M}]^+$ , HRMS  $m/z$ : [EI] calculated for  $\text{C}_{33}\text{H}_{39}\text{BN}_2\text{O}_5$   $[\text{M}]^+$ : 554.2952; found 554.2944.

#### (S)-2-Amino-N-(-pinacol phenyl boronate)-3,3-dimethylbutanamide (4a)

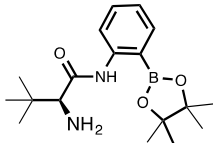

viscous liquid; 55% yield;  $[\alpha]_D^{20} = -45.80$  ( $c = 0.10$ ,  $\text{CHCl}_3$ ); IR (neat) 2971, 2360, 1607, 1445, 1152, 1021, 753  $\text{cm}^{-1}$ ;  $^1\text{H}$  NMR (500 MHz,  $\text{CDCl}_3$ , ppm):  $\delta$  9.43 (s, 1H), 7.14-7.05 (m, 1H), 7.03-6.97 (m, 1H), 6.95-6.89 (m, 1H), 6.86-6.80 (m, 1H), 3.35 (s, 1H), 1.23 (s, 12H), 1.07 (s, 9H);  $^{13}\text{C}$  NMR (125 MHz,  $\text{CDCl}_3$ , ppm):  $\delta$  172.9, 143.6, 136.0, 132.3, 123.5, 118.8, 83.9, 75.2, 66.0, 34.7, 26.8, 25.1, 24.9; MS (EI):  $m/z = 332$   $[\text{M}]^+$ , HRMS  $m/z$ : [EI] calculated for  $\text{C}_{18}\text{H}_{29}\text{BN}_2\text{O}_3$   $[\text{M}]^+$ : 332.2271; found 332.2272.

#### (S)-2-Aminoboc-N-( (+)-2,3-pinandediol phenyl boronate)-3,3-dimethylbutanamide (3b)

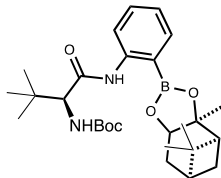

transparent liquid; 91% yield; mp 153 °C;  $[\alpha]_D^{20} = -22.80$  (c = 0.10, CHCl<sub>3</sub>) ; IR (neat) 3367, 2966, 1692, 1478, 1447, 1357, 1342, 1162, 1055, 1039 cm<sup>-1</sup>; <sup>1</sup>H NMR (500 MHz, CDCl<sub>3</sub>, ppm): δ 9.42 (s, 1H), 8.44 (d, *J* = 8.59 Hz, 1H), 7.87-7.74 (m, 1H), 7.46-7.43 (m, 1H), 7.12-7.06 (m, 1H), 5.38 (d, *J* = 14.89 Hz, 1H), 4.52-4.42 (m, 1H), 3.93 (d, *J* = 9.16 Hz, 1H), 2.47-2.37 (m, 1H), 2.32-2.11 (m, 2H), 2.04-1.89 (m, 2H), 1.52 (s, 3H), 1.42 (s, 9H), 1.31 (s, 3H), 1.18-1.12 (m, 1H), 1.06 (s, 9H), 0.89 (s, 3H) ; <sup>13</sup>C NMR (125 MHz, CDCl<sub>3</sub>, ppm): δ 169.6, 155.8, 144.0, 136.4, 132.9, 123.3, 119.4, 87.5, 79.7, 78.2, 63.9, 51.4, 39.5, 38.4, 35.6, 33.4, 31.6, 28.8, 28.4, 27.1, 26.8, 26.5, 24.1, 22.7, 14.2; MS (EI): *m/z* = 484 [M]<sup>+</sup>, HRMS *m/z*: [EI] calculated for C<sub>27</sub>H<sub>41</sub>BN<sub>2</sub>O<sub>5</sub> [M]<sup>+</sup>: 484.3109; found 484.3107.

**(S)-2-Amino-N-( (+)-2,3-pinandediol phenyl boronate)-3,3-dimethylbutanamide (4b)**

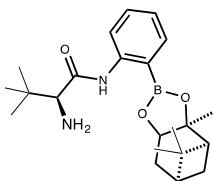

Colorless solid; 80% yield; mp 50-53 °C;  $[\alpha]_D^{20} = -34.80$  (c = 0.40, CHCl<sub>3</sub>) ; IR (neat) 3674, 2925, 2359, 1632, 1600, 1480, 1447, 1370, 1166, 1054, 1033 759 cm<sup>-1</sup>; <sup>1</sup>H NMR (500 MHz, CDCl<sub>3</sub>, ppm): δ 8.49 (d, *J* = 8.59 Hz, 1H), 7.79-7.74 (m, 1H), 7.45-7.42 (m, 1H), 7.11-7.03 (m, 1H), 4.51-4.43 (m, 1H), 3.14 (s, 1H), 2.46-2.37 (m, 1H), 2.23-2.10 (m, 2H), 2.05-1.90 (m, 2H), 1.50 (s, 3H), 1.31 (s, 3H), 1.24-1.21 (m, 1H), 1.03 (s, 9H), 0.89 (s, 3H); <sup>13</sup>C NMR (125 MHz, CDCl<sub>3</sub>, ppm): δ 181.1, 172.9, 144.4, 136.4, 133.2, 123.8, 119.1, 86.9, 78.1, 65.6, 51.6, 39.6, 38.2, 35.5, 35.0, 28.8, 27.1, 26.9, 26.5, 23.8; MS (EI): *m/z* = 385 [M+H]<sup>+</sup> HRMS *m/z*: [EI] calculated for C<sub>22</sub>H<sub>33</sub>BN<sub>2</sub>O<sub>3</sub> [M]<sup>+</sup>: 384.2584 found [M+1]<sup>+</sup>: 385.2659.

**(S)-2-Aminoboc-N-( (+)-2,3-pinandediol phenyl boronate)-3-methyl butanamide (3c)**

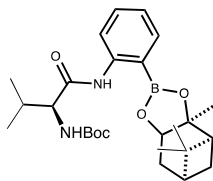

transparent liquid; 89% yield; mp 153 °C;  $[\alpha]_D^{20} = -36.80$  ( $c = 0.40$ ,  $\text{CHCl}_3$ ); IR (neat) 3346, 2928, 1688, 1613, 1480, 1447, 1343, 1159, 1076, 1041, 761  $\text{cm}^{-1}$ ;  $^1\text{H}$  NMR (500 MHz,  $\text{CDCl}_3$ , ppm):  $\delta$  9.56 (s, 1H), 8.51-8.41 (m, 1H), 7.78 (d,  $J = 6.30$  Hz, 1H), 7.51-7.39 (m, 1H), 7.14-7.04 (m, 1H), 5.19 (d,  $J = 8.59$  Hz, 1H), 4.49 (d,  $J = 8.02$  Hz, 1H), 4.20-4.08 (m, 1H), 2.47-2.41 (m, 1H), 2.33-2.16 (m, 2H), 2.03-1.91 (m, 2H), 1.59-1.57 (m, 1H), 1.52 (s, 3H), 1.49 (s, 9H), 1.32 (s, 3H), 1.20-1.13 (m, 1H), 1.00 (d,  $J = 6.87$  Hz, 3H), 0.93 (d,  $J = 6.87$  Hz, 3H), 0.89 (s, 3H);  $^{13}\text{C}$  NMR (125 MHz,  $\text{CDCl}_3$ , ppm):  $\delta$  169.9, 155.8, 144.2, 136.6, 133.0, 123.3, 119.0, 87.2, 79.8, 78.2, 61.0, 51.5, 39.8, 38.4, 35.7, 31.7, 28.8, 28.3, 27.1, 26.5, 24.3, 19.3, 17.6; MS (EI):  $m/z = 470$   $[\text{M}]^+$ , HRMS  $m/z$ : [EI] calculated for  $\text{C}_{26}\text{H}_{39}\text{BN}_2\text{O}_5$   $[\text{M}]^+$ : 470.2952; found 470.2947.

**(S)-2-Amino-N-(+)-2,3-pinandediol phenyl boronate)-3-methyl butanamide (4c)**

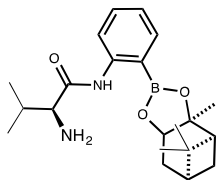

transparent liquid; 80% yield; mp 153 °C;  $[\alpha]_D^{20} = -54.80$  ( $c = 0.10$ ,  $\text{CHCl}_3$ ); IR (neat) 3273, 2960, 2922, 2869, 1479, 1447, 1357, 1166, 1076, 1051, 760  $\text{cm}^{-1}$ ;  $^1\text{H}$  NMR (500 MHz,  $\text{CDCl}_3$ , ppm):  $\delta$  8.37-8.29 (m, 1H), 7.80-7.70 (m, 1H), 7.46-7.39 (m, 1H), 7.13-7.04 (m, 1H), 4.46 (d,  $J = 10.31$  Hz, 1H), 3.34 (d,  $J = 4.01$  Hz, 1H), 2.47-2.36 (m, 1H), 2.34-2.27 (m, 1H), 2.26-2.17 (m, 1H), 2.15-2.11 (m, 1H), 2.03-1.88 (m, 2H), 1.49 (s, 3H), 1.30 (s, 3H), 1.02 (d,  $J = 6.87$  Hz, 3H), 1.24-1.22 (m, 1H), 0.93-0.83 (m, 6H);  $^{13}\text{C}$  NMR (125 MHz,  $\text{CDCl}_3$ , ppm):  $\delta$  173.8, 136.1, 132.1, 123.1, 119.3, 87.1, 78.2, 61.4, 51.3, 39.5, 38.1, 36.2, 31.6, 28.9, 27.3, 26.5, 24.1, 19.8, 16.5; MS (EI):  $m/z = 370$   $[\text{M}]^+$ , HRMS  $m/z$ : [EI] calculated for  $\text{C}_{21}\text{H}_{31}\text{BN}_2\text{O}_3$   $[\text{M}]^+$ : 370.2428; found 370.2430.

**(S)-2-Aminoboc-N-(+)-2,3-pinandediol phenyl boronate)- propenamide (3d)**

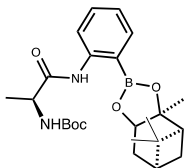

white solid; 88% yield; mp 62-64 °C;  $[\alpha]_D^{20} = -37.80$  ( $c = 0.10$ ,  $\text{CHCl}_3$ ); IR (neat) 3334, 2923, 2359, 1693, 1579, 1447, 1344, 1161, 1077, 1040, 756  $\text{cm}^{-1}$ ;  $^1\text{H}$  NMR (500 MHz,  $\text{CDCl}_3$ , ppm):  $\delta$  9.59 (s,



1H), 8.51-8.36 (m, 1H), 7.77 (d,  $J = 7.45$  Hz, 1H), 7.47-7.40 (m, 1H), 7.14-6.97 (m, 1H), 5.35-5.16 (m, 1H), 4.49 (d,  $J = 8.59$  Hz, 1H), 4.37-4.27 (m, 1H), 2.52-2.37 (m, 1H), 2.29-2.12 (m, 2H), 2.04-1.91 (m, 2H), 1.51 (s, 3H), 1.48-1.44 (m, 12H), 1.31 (s, 3H), 1.18 (d,  $J = 10.88$  Hz, 1H), 0.89 (s, 3H);  $^{13}\text{C}$  NMR (125 MHz,  $\text{CDCl}_3$ , ppm):  $\delta$  170.9, 155.2, 144.3, 136.4, 132.9, 123.3, 119.5, 87.1, 79.9, 78.4, 51.2, 39.6, 38.3, 35.5, 28.8, 28.4, 27.0, 26.5, 24.1, 19.5; MS (EI):  $m/z = 442$   $[\text{M}]^+$ , HRMS  $m/z$ : [EI] calculated for  $\text{C}_{24}\text{H}_{35}\text{BN}_2\text{O}_5$   $[\text{M}]^+$ : 442.2639; found 442.2633.

**(S)-2-Amino-N-( (+)-2,3-pinandediol phenyl boronate)-propanamide (4d)**

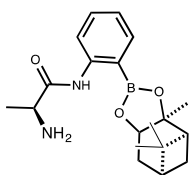

white solid; 80% yield; mp 109-111 °C;  $[\alpha]_{\text{D}}^{20} = -34.80$  ( $c = 0.10$ ,  $\text{CHCl}_3$ ); IR (neat) 3228, 2980, 2886, 1620, 1482, 1448, 1369, 1166, 1054, 1012  $\text{cm}^{-1}$ ;  $^1\text{H}$  NMR (500 MHz,  $\text{CDCl}_3$ , ppm):  $\delta$  8.32-8.27 (m, 1H), 7.78-7.71 (m, 1H), 7.45-7.37 (m, 1H), 7.10-7.04 (m, 1H), 4.48-4.44 (m, 1H), 3.63-3.53 (m, 1H), 2.46-2.33 (m, 1H), 2.25-2.18 (m, 1H), 2.14-2.07 (m, 1H), 2.02-1.86 (m, 2H), 1.49 (s, 3H), 1.38 (d,  $J = 12.60$  Hz, 3H), 1.29 (s, 3H), 1.27-1.23 (m, 1H), 0.87 (s, 3H);  $^{13}\text{C}$  NMR (125 MHz,  $\text{CDCl}_3$ , ppm):  $\delta$  174.5, 143.4, 135.9, 132.0, 123.2, 119.3, 86.4, 78.1, 52.1, 51.3, 39.6, 38.5, 35.7, 28.9, 27.0, 26.2, 24.1, 21.5; MS (EI):  $m/z = 342$   $[\text{M}]^+$ , HRMS  $m/z$ : [EI] calculated for  $\text{C}_{19}\text{H}_{27}\text{BN}_2\text{O}_3$   $[\text{M}]^+$ : 342.2115; found  $[\text{M}]^+$ : 342.2120.

**(S)-2-Amino-N-( (+)-2,3-pinandediol phenyl boronate)-2-phenylethanamide (3e)**

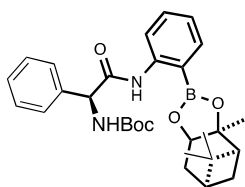

Colorless solid. 90% yield; mp 66-68 °C;  $[\alpha]_{\text{D}}^{20} = +10.20$  ( $c = 0.10$ ,  $\text{CHCl}_3$ ); IR (neat) 3345, 2932, 1694, 1482, 1447, 1343, 1160, 1076, 1051, 754  $\text{cm}^{-1}$ ;  $^1\text{H}$  NMR (500 MHz,  $\text{CDCl}_3$ , ppm):  $\delta$  9.48 (s, 1H), 8.55-8.45 (m, 1H), 7.78-7.76 (m, 1H), 7.46-7.42 (m, 3H), 7.38-7.32 (m, 3H), 7.09-7.06 (m, 1H), 5.96-5.91 (m, 1H), 5.31-5.18 (m, 1H), 4.49-4.28 (m, 1H), 2.53-2.34 (m, 1H), 2.28-2.11 (m, 2H), 2.00-1.82 (m, 2H), 1.48 (s, 3H), 1.42 (s, 9H), 1.33 (s, 3H), 1.13-1.10 (m, 1H), 0.89 (s, 3H);  $^{13}\text{C}$  NMR

(125 MHz, CDCl<sub>3</sub>, ppm):  $\delta$  168.5, 155.3, 144.3, 136.5, 136.4, 132.9, 129.0, 128.4, 128.3, 127.5, 123.3, 119.2, 87.2, 80.0, 78.3, 59.8, 51.4, 39.6, 39.4, 38.2, 35.4, 35.2, 28.8, 28.6, 28.4, 27.1, 26.7, 26.4, 24.1; MS (EI):  $m/z$  = 504 [M]<sup>+</sup>, HRMS  $m/z$ : [EI] calculated for C<sub>29</sub>H<sub>37</sub>BN<sub>2</sub>O<sub>5</sub> [M]<sup>+</sup>: 504.2796; found 504.2796.

**(S)-2-Amino-N-( (+)-2,3-pinandediol phenyl boronate)-2-phenylethanamide (4e)**

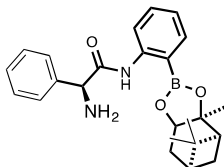

pale yellow liquid; 80% yield; mp 153 °C;  $[\alpha]_D^{20}$  = +15.20 (c = 0.10, CHCl<sub>3</sub>); IR (neat) 3286, 2920, 1685, 1607, 1476, 1447, 1344, 1160, 1076, 1040, 758 cm<sup>-1</sup>; <sup>1</sup>H NMR (500 MHz, CDCl<sub>3</sub>, ppm):  $\delta$  8.53-8.44 (m, 1H), 7.80-7.74 (m, 1H), 7.52-7.39 (m, 3H), 7.37-7.25 (m, 3H), 7.07-7.02 (m, 1H), 4.63 (s, 1H), 4.42-4.30 (m, 1H), 2.46-2.38 (m, 1H), 2.24-2.11 (m, 2H), 2.04-1.94 (m, 2H), 1.50 (s, 3H), 1.32 (s, 3H), 1.17 (d,  $J$  = 10.88 Hz, 1H), 0.89 (s, 3H); <sup>13</sup>C NMR (125 MHz, CDCl<sub>3</sub>, ppm):  $\delta$  171.8, 144.3, 141.1, 136.6, 132.8, 128.9, 128.1, 127.2, 122.9, 119.1, 87.2, 77.9, 61.2, 51.6, 39.4, 38.2, 35.3, 28.6, 27.3, 26.3, 24.1; MS (EI):  $m/z$  = 404 [M]<sup>+</sup>, HRMS  $m/z$ : [EI] calculated for C<sub>24</sub>H<sub>29</sub>BN<sub>2</sub>O<sub>3</sub> [M]<sup>+</sup>: 404.2271; found [M]<sup>+</sup>: 404.2264.

**(S)-2-Aminoboc-N-( (+)-2,3-pinandediol phenyl boronate)-3-phenylpropanamide (3f)**

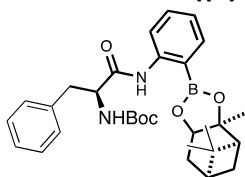

transparent liquid; 80% yield; mp 153 °C;  $[\alpha]_D^{20}$  = -50.80 (c = 0.10, CHCl<sub>3</sub>); IR (neat) 3296, 2919, 1719, 1657, 1447, 1355, 1159, 1077, 1040, 758 cm<sup>-1</sup>; <sup>1</sup>H NMR (500 MHz, CDCl<sub>3</sub>, ppm):  $\delta$  9.59 (s, 1H), 8.51-8.42 (m, 1H), 7.81-7.71 (m, 1H), 7.53-7.38 (m, 1H), 7.32-7.12 (m, 5H), 7.12-7.04 (m, 1H), 5.11-4.98 (m, 1H), 4.60-4.33 (m, 2H), 3.29-3.04 (m, 2H), 2.44-2.30 (m, 1H), 2.25-2.13 (m, 2H), 1.95-1.74 (m, 2H), 1.44 (s, 3H), 1.41 (s, 9H), 1.27 (s, 3H), 1.08 (d,  $J$  = 10.88 Hz, 1H), 0.86 (s, 3H); <sup>13</sup>C NMR (125 MHz, CDCl<sub>3</sub>, ppm):  $\delta$  169.6, 155.2, 144.2, 136.4, 136.3, 132.9, 129.5, 128.6, 127.0, 123.3, 119.6, 86.8, 80.1, 78.4, 56.7, 51.2, 39.5, 38.9, 38.2, 35.4, 31.6, 28.6, 28.4, 28.1, 26.9, 26.3,

24.0; MS (EI):  $m/z = 518$   $[M]^+$ , HRMS  $m/z$ : [EI] calculated for  $C_{30}H_{39}BN_2O_5$   $[M]^+$ : 518.2952; found  $[M]^+$ : 518.2960.

**(S)-2-Amino-N-((+)-2,3-pinandediol phenyl boronate)-3-phenylpropanamide (4f)**

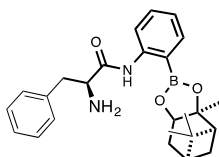

Colorless solid; 80% yield; mp 53-55 °C;  $[\alpha]_D^{20} = -46.80$  ( $c = 0.10$ ,  $CHCl_3$ ); IR (neat) 3262, 2918, 1676, 1605, 1478, 1447, 1345, 1160, 1076, 1040, 759  $cm^{-1}$ ;  $^1H$  NMR (500 MHz,  $CDCl_3$ , ppm):  $\delta$  10.46 (s, 1H), 8.46-8.38 (m, 1H), 7.80-7.72 (m, 1H), 7.48-7.44 (m, 1H), 7.34-7.29 (m, 2H), 7.27-7.20 (m, 3H), 7.12-7.05 (m, 1H), 4.47-4.40 (m, 1H), 3.77-3.70 (m, 1H), 3.38-3.30 (m, 1H), 2.82-2.76 (m, 1H), 2.46-2.35 (m, 1H), 2.25-2.17 (m, 1H), 2.12-2.07 (m, 1H), 1.97-1.90 (m, 2H), 1.48 (s, 3H), 1.29 (s, 3H), 1.21 (d,  $J = 10.88$  Hz, 1H), 0.87 (s, 3H);  $^{13}C$  NMR (125 MHz,  $CDCl_3$ , ppm):  $\delta$  173.8, 143.5, 138.1, 136.5, 132.1, 129.3, 128.8, 126.9, 123.1, 119.8, 86.4, 78.3, 57.7, 51.6, 41.5, 39.5, 38.3, 35.2, 29.0, 27.1, 26.4, 24.1; MS (EI):  $m/z = 418$   $[M]^+$ , HRMS  $m/z$ : [EI] calculated for  $C_{25}H_{31}BN_2O_3$   $[M]^+$ : 418.2428; found  $[M]^+$ : 418.2431;

**(S)-2-N-Boc pyrrolidine-N-((+)-2,3-pinandediol phenyl boronate)-carboxamide (3g)**

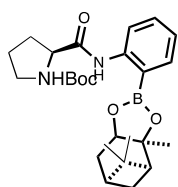

transparent liquid; 80% yield; mp 153 °C;  $[\alpha]_D^{20} = -133.80$  ( $c = 0.10$ ,  $CHCl_3$ ); IR (neat) 3329, 2931, 2868, 1687, 1608, 1475, 1446, 1345, 1158, 1077, 1030, 754  $cm^{-1}$ ;  $^1H$  NMR (500 MHz,  $CDCl_3$ , ppm):  $\delta$  9.88 (s, 1H), 8.66 (d,  $J = 8.59$  Hz, 1H), 7.78 (d,  $J = 7.45$  Hz, 1H), 7.46 (t,  $J = 8.0$  Hz, 1H), 7.07 (t,  $J = 8.0$  Hz, 1H), 4.60 (d,  $J = 8.02$  Hz, 1H), 4.31-4.21 (m, 4H), 3.63-3.49 (m, 2H), 2.55-2.45 (m, 1H), 2.38-2.28 (m, 1H), 2.28-2.11 (m, 3H), 2.00-1.84 (m, 1H), 1.42 (s, 3H), 1.34 (s, 9H), 1.31 (s, 3H), 1.15 (d,  $J = 10.31$  Hz, 1H), 0.88 (s, 3H);  $^{13}C$  NMR (125 MHz,  $CDCl_3$ , ppm):  $\delta$  172.4, 144.3, 136.4, 133.2, 123.3, 118.9, 86.1, 80.9, 78.7, 61.9, 51.3, 47.6, 39.2, 37.7, 35.3, 32.2, 28.9, 28.5, 27.2, 25.8,

24.0, 23.5; MS (EI):  $m/z = 468 [M]^+$ , HRMS  $m/z$ : [EI] calculated for  $C_{26}H_{37}BN_2O_5 [M]^+$ : 468.2796; found  $[M]^+$ : 468.2803;

**(S)-2-pyrrolidine-N-((+)-2,3-pinane-1,2-diol phenyl boronate)-carboxamide (4g)**

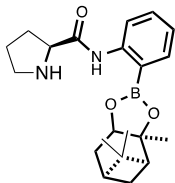

Colorless solid; 80% yield; mp 64-66 °C;  $[\alpha]_D^{20} = -38.80$  ( $c = 0.10$ ,  $CHCl_3$ ); IR (neat) 3319, 3168, 2917, 1654, 1517, 1447, 1359, 1283, 1078, 1041, 765  $cm^{-1}$ ;  $^1H$  NMR (500 MHz,  $CDCl_3$ , ppm):  $\delta$  10.74 (s, 1H), 8.41 (d,  $J = 8.59$  Hz, 1H), 7.80-7.73 (m, 1H), 7.45-7.36 (m, 1H), 7.13-7.02 (m, 1H), 4.52-4.17 (m, 1H), 3.93-3.82 (m, 1H), 3.11-2.95 (m, 2H), 2.48-2.36 (m, 1H), 2.29-2.09 (m, 3H), 2.07-1.89 (m, 3H), 1.85-1.68 (m, 2H), 1.49 (s, 3H), 1.31 (s, 3H), 1.29-1.25 (m, 1H), 0.89 (s, 3H);  $^{13}C$  NMR (125 MHz,  $CDCl_3$ , ppm):  $\delta$  174.6, 143.6, 136.0, 132.0, 123.0, 118.8, 86.3, 78.0, 60.6, 51.7, 47.8, 39.7, 38.3, 35.7, 31.1, 28.9, 27.2, 26.6, 26.2, 24.3; MS (EI):  $m/z = 368 [M]^+$ , HRMS  $m/z$ : [EI] calculated for  $C_{21}H_{29}BN_2O_3 [M]^+$ : 368.2271; found  $[M]^+$ : 368.2266;

**(S)-2-Aminomethyl-N-((+)-2,3-pinane-1,2-diol phenyl boronate)-3,3-dimethylbutanamide (4h)**

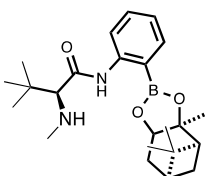

pale liquid; 84% yield;  $[\alpha]_D^{20} = +80.00$  ( $c = 0.10$ ,  $CHCl_3$ ); IR (neat) 2923, 2868, 1694, 1476, 1446, 1342, 1162, 1119, 1078, 1041, 757  $cm^{-1}$ ;  $^1H$  NMR (500 MHz,  $CDCl_3$ , ppm):  $\delta$  10.2 (s, 1H), 8.57 (d,  $J = 8.59$  Hz, 1H), 7.81-7.76 (m, 1H), 7.47-7.40 (m, 1H), 7.11-7.04 (m, 1H), 4.47-4.42 (m, 1H), 2.72 (s, 1H), 2.47-2.39 (m, 1H), 2.37 (s, 3H), 2.26-2.19 (m, 1H), 2.17-2.12 (m, 1H), 2.03-1.92 (m, 2H), 1.56 (s, 1H), 1.50 (s, 3H), 1.32 (s, 3H), 1.24 (d,  $J = 10.88$  Hz, 1H), 1.03 (s, 9H), 0.89 (s, 3H);  $^{13}C$  NMR (125 MHz,  $CDCl_3$ , ppm):  $\delta$  172.2, 144.2, 136.2, 132.4, 123.1, 119.1, 86.9, 78.0, 76.2, 51.6, 39.8, 38.3, 36.0, 35.4, 34.0, 29.0, 27.4, 27.2, 26.6, 24.1; MS (EI):  $m/z = 398 [M]^+$ , HRMS  $m/z$ : [EI] calculated for  $C_{23}H_{35}BN_2O_3 [M]^+$ : 398.2741; found  $[M]^+$ : 398.2741;

## 4 $^1\text{H}$ NMR and $^{13}\text{C}$ NMR Spectra

### (S)-2-AminoFmoc-N-(pinacol phenyl boronate)-3,3-dimethylbutanamide

#### $^1\text{H}$ -NMR

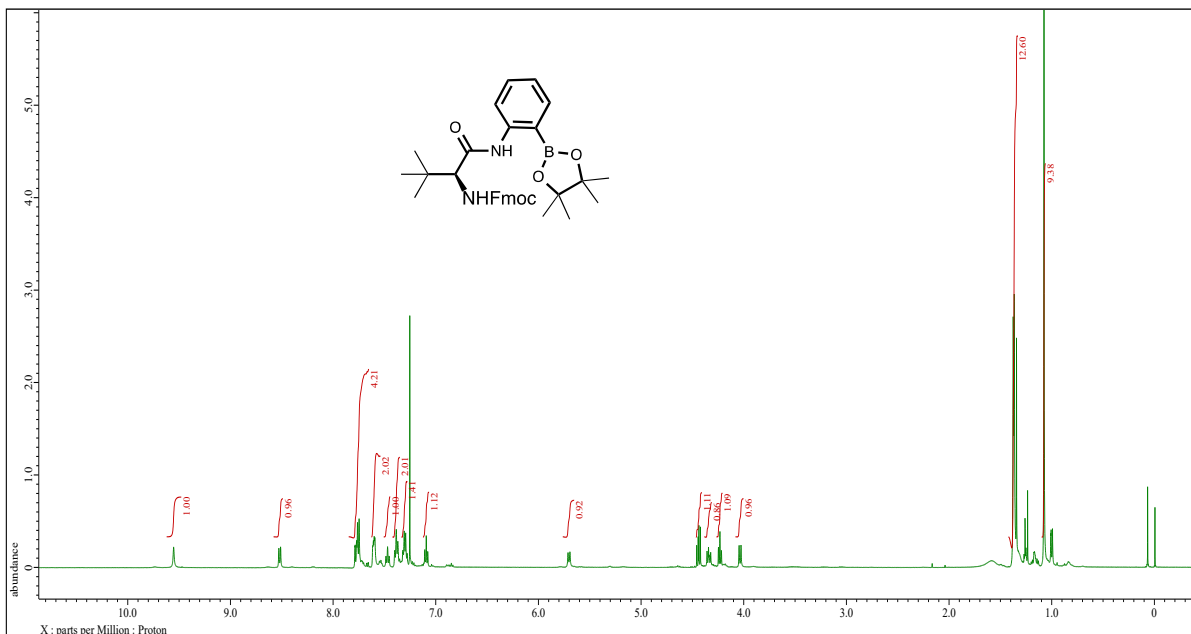

#### $^{13}\text{C}$ -NMR

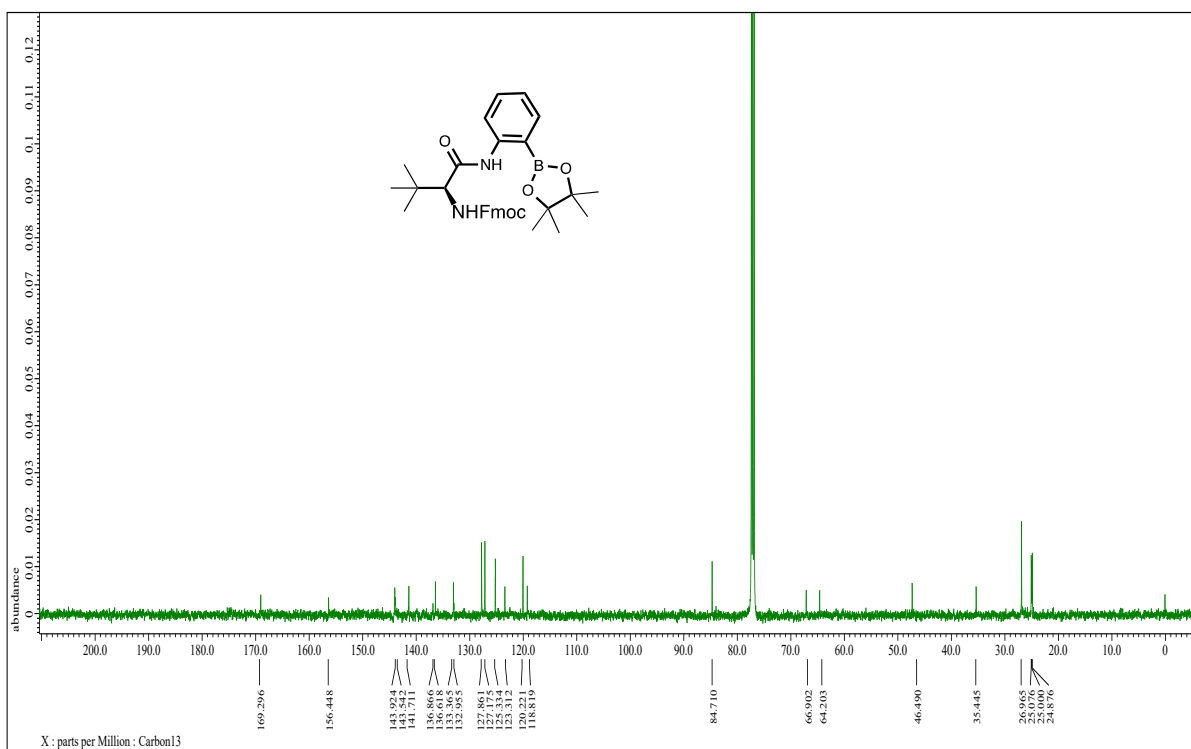

# (S)-2-Amino-N-(pinacol phenyl boronate)-3,3-dimethylbutanamide

## <sup>1</sup>H-NMR

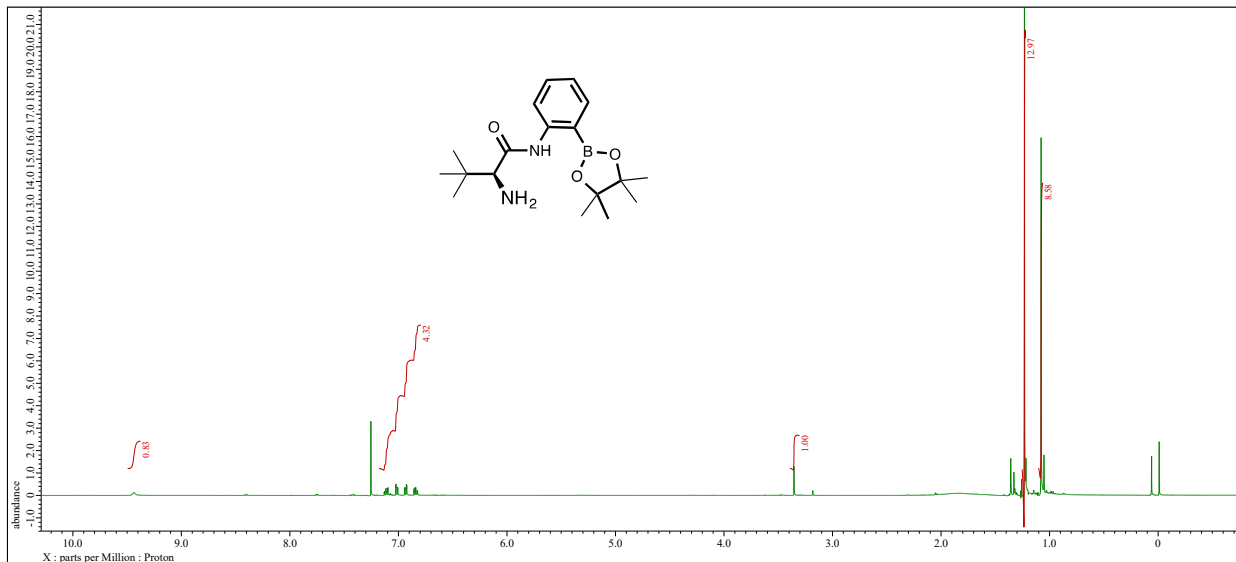

## <sup>13</sup>C-NMR

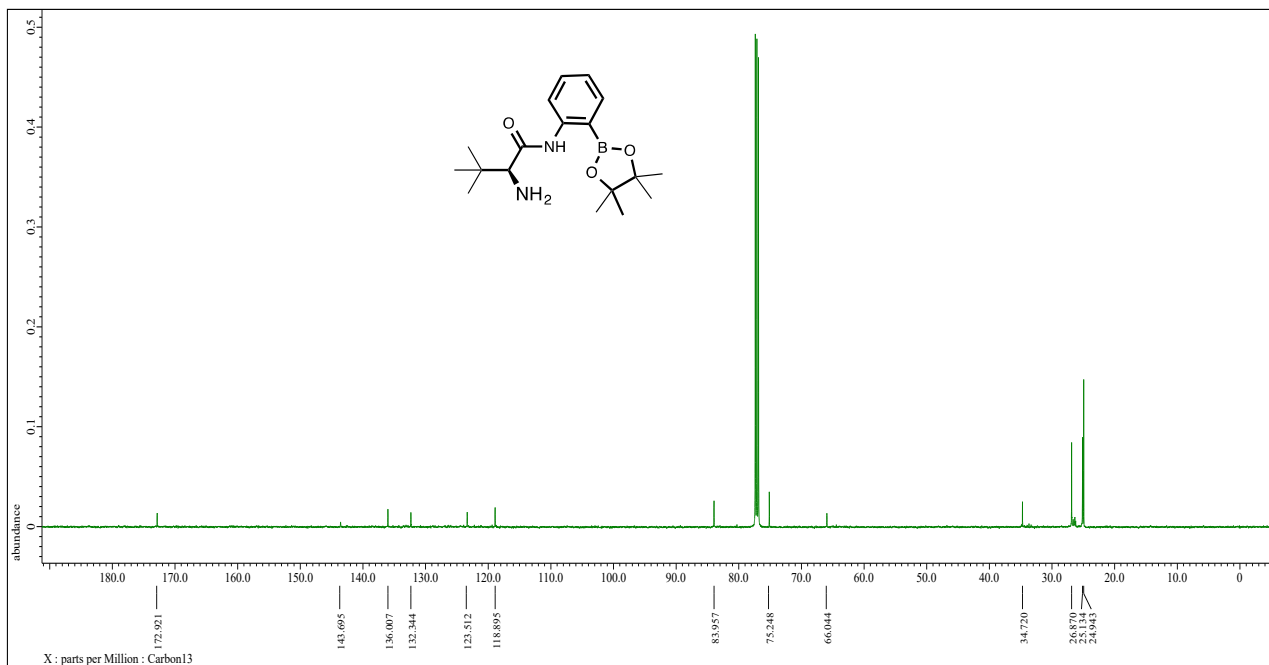

# (S)-2-Aminoboc-N-( (+)-2,3-pinandediol phenyl boronate)-3,3-dimethylbutanamide

## <sup>1</sup>H-NMR

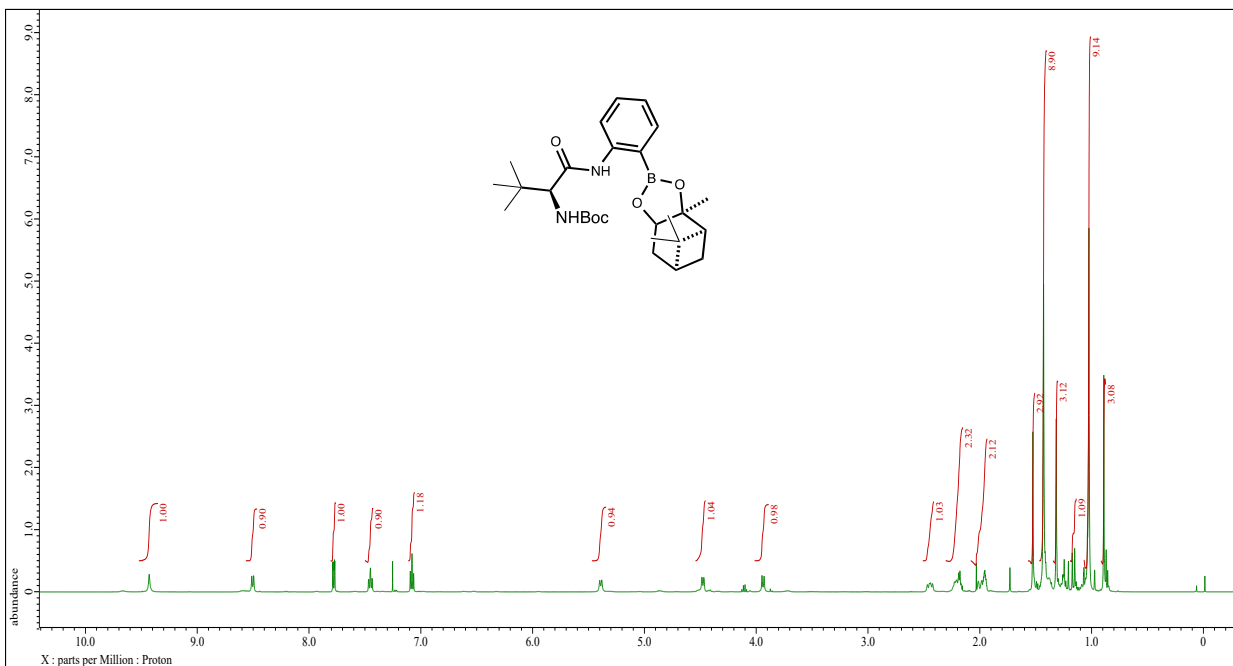

## <sup>13</sup>C-NMR

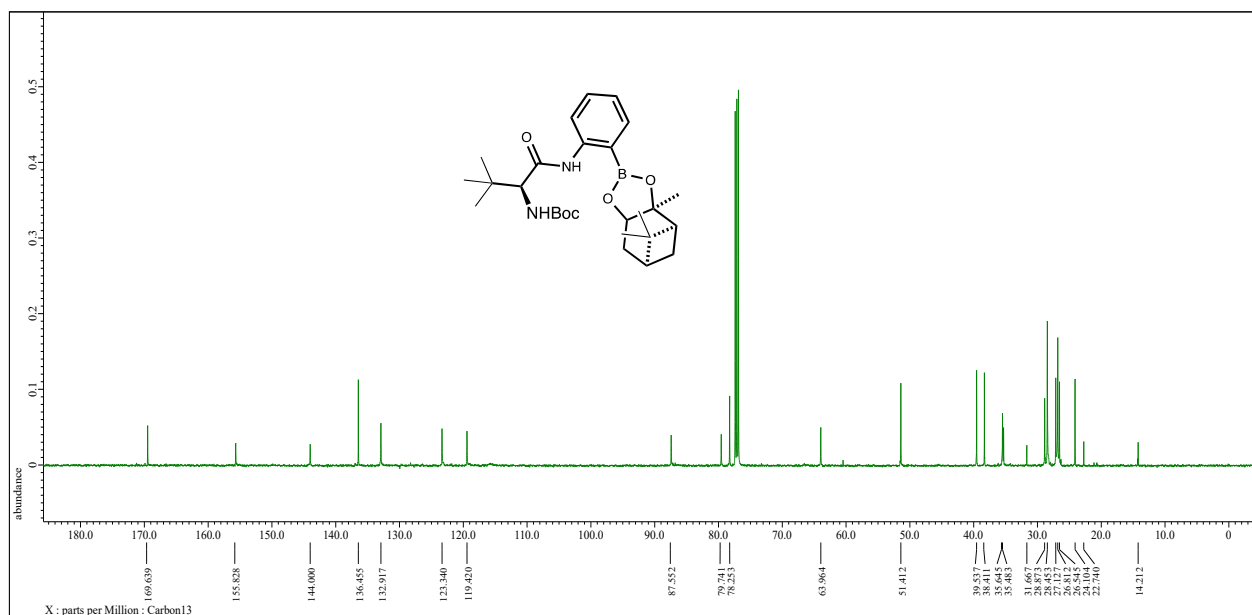

# (S)-2-Amino-N-( (+)-2,3-pinandediol phenyl boronate)-3,3-dimethylbutanamide

## <sup>1</sup>H-NMR

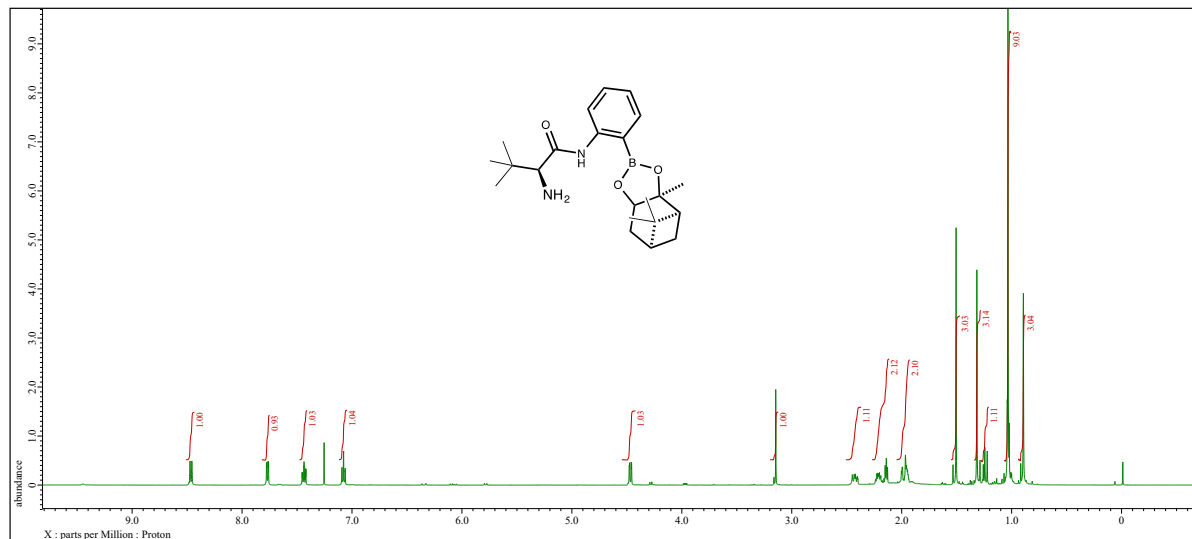

## <sup>13</sup>C-NMR

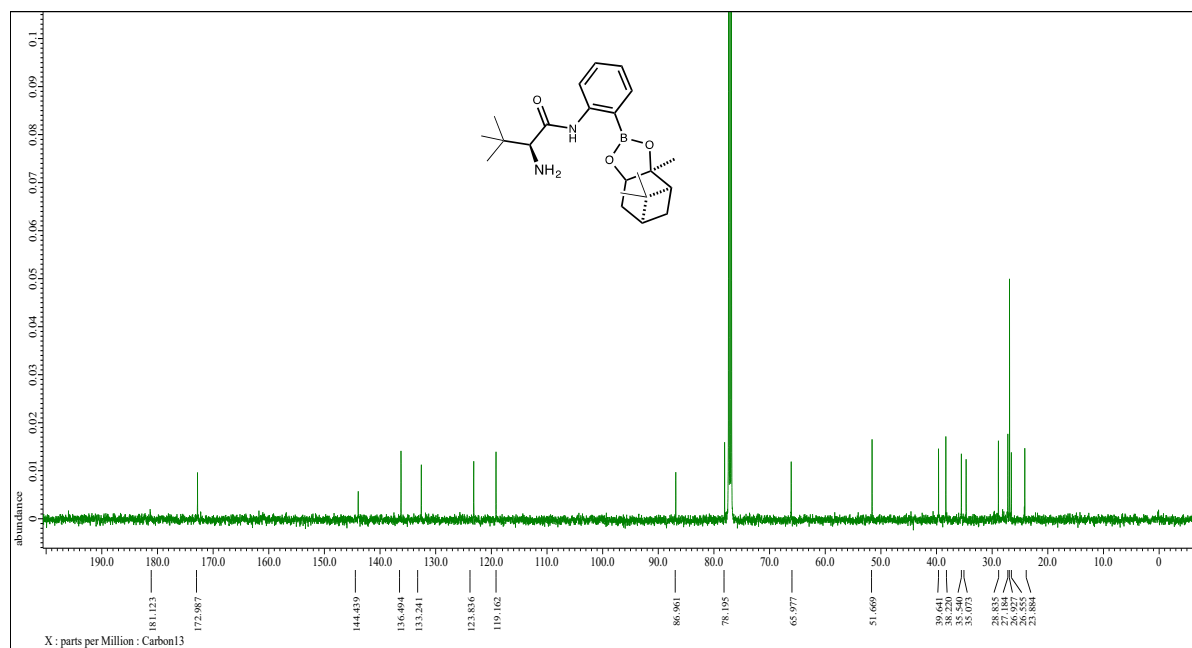



# (S)-2-Aminoboc-N-( (+)-2,3-pinandediol phenyl boronate)-3-methyl butanamide

## <sup>1</sup>H-NMR

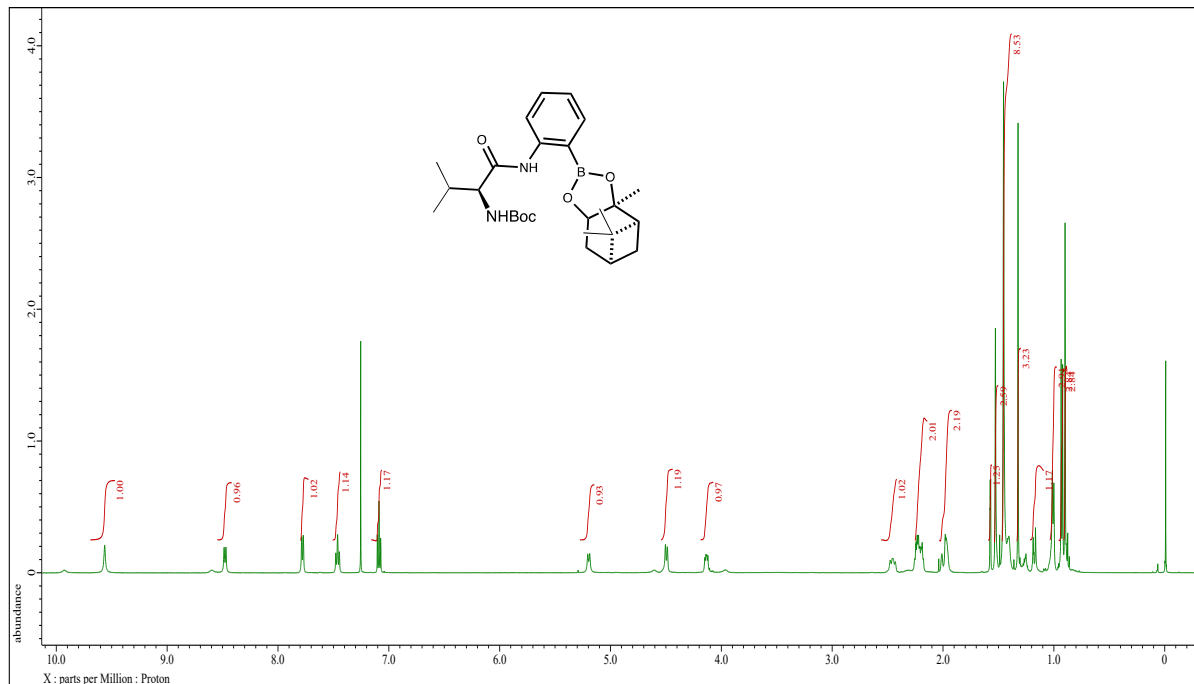

## <sup>13</sup>C-NMR

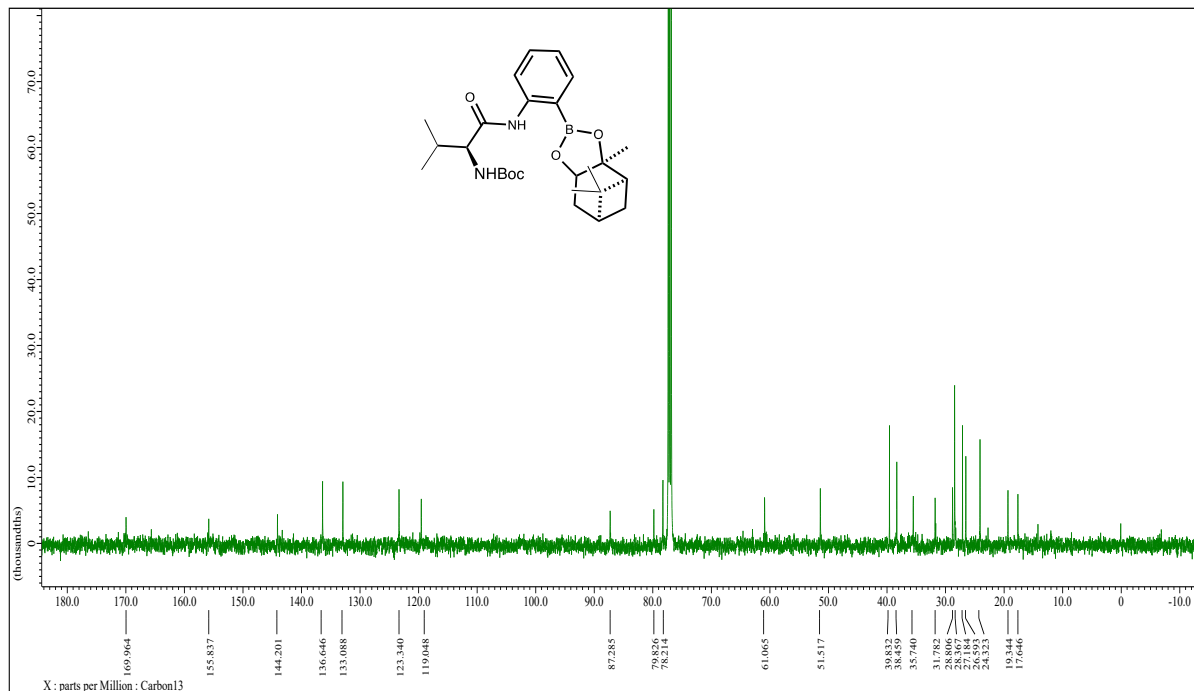

# (S)-2-Amino-N-( (+)-2,3-pinandediol phenyl boronate)-3-methyl butanamide

## <sup>1</sup>H-NMR

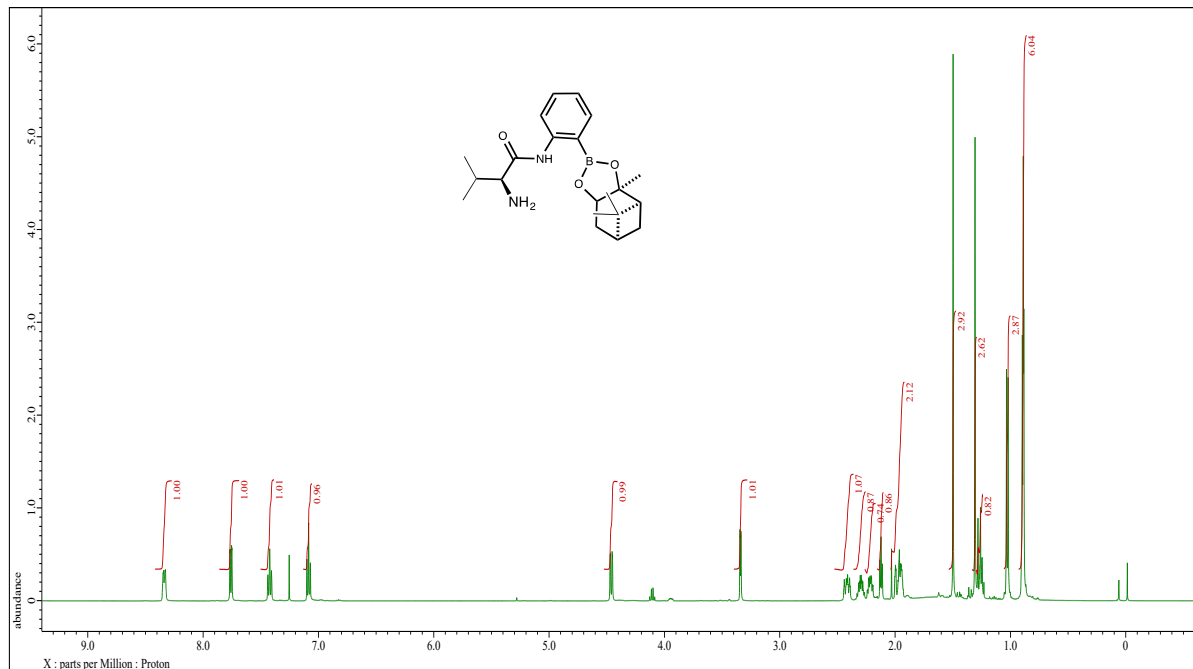

## <sup>13</sup>C-NMR

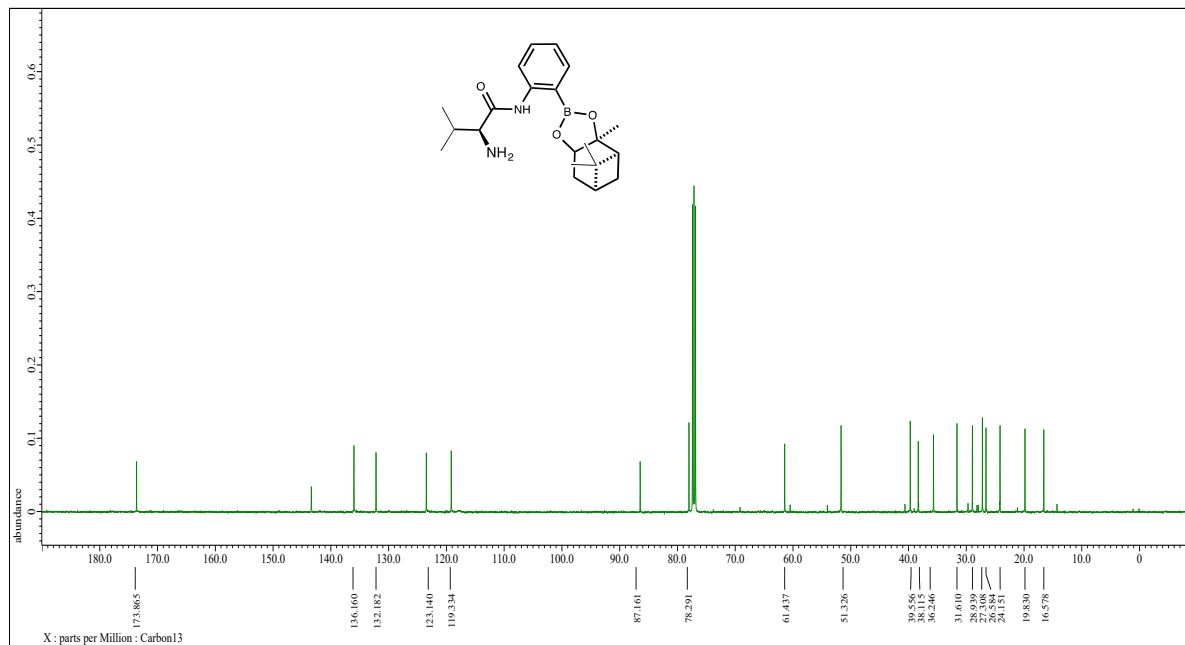

# (S)-2-Aminoboc-N-( (+)-2,3-pinandediol phenyl boronate)- propanamide

## <sup>1</sup>H-NMR

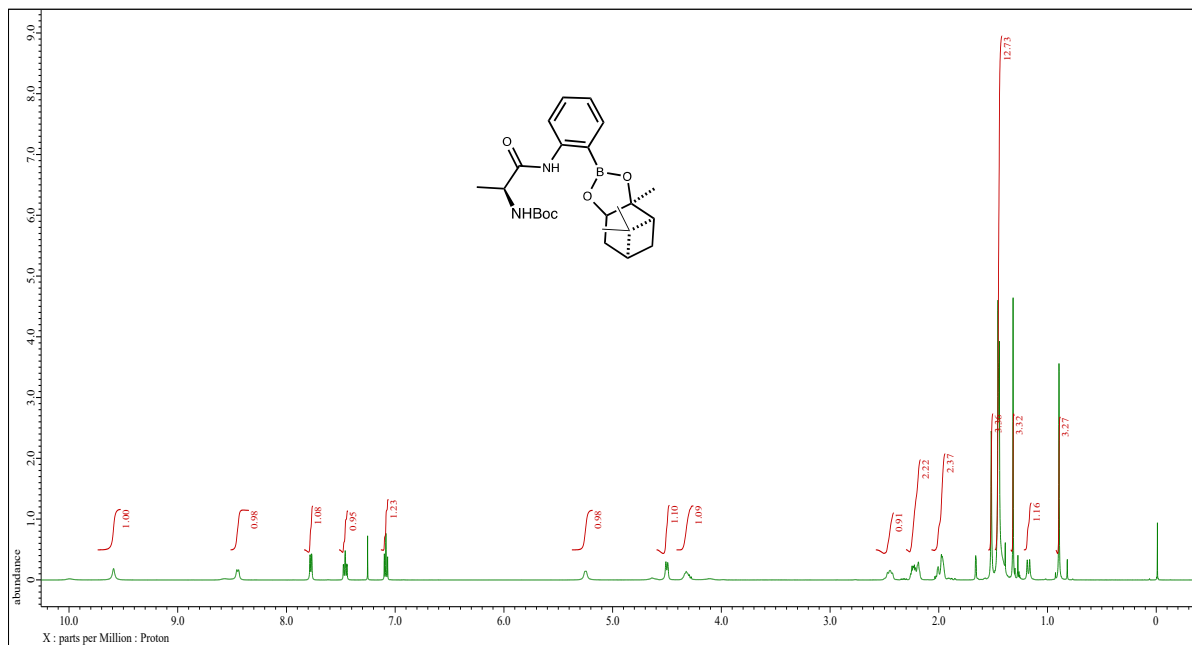

## <sup>13</sup>C-NMR

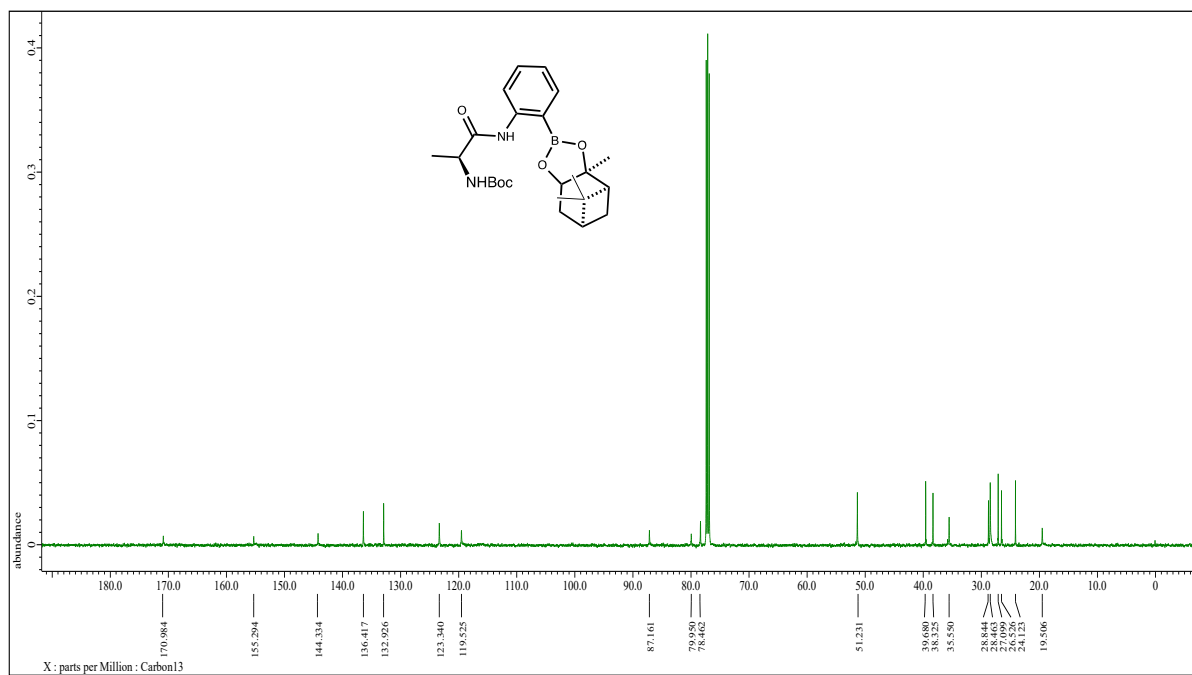

# (S)-2-Amino-N-( (+)-2,3-pinandediol phenyl boronate)-propanamide

## <sup>1</sup>H-NMR

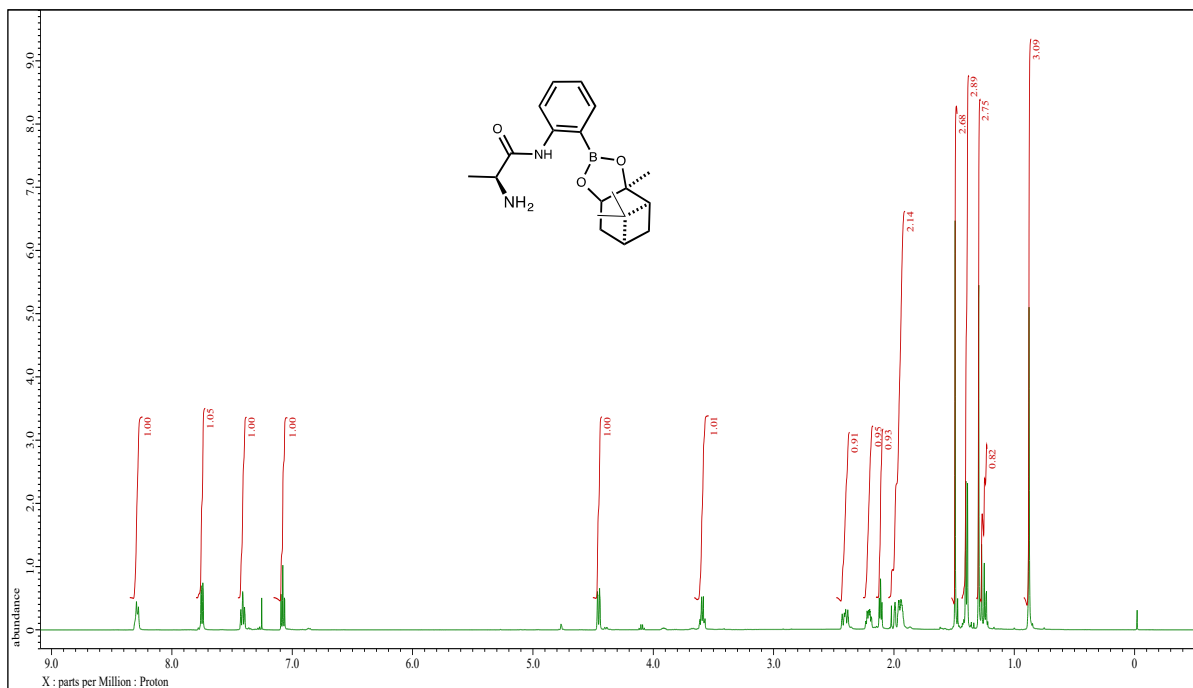

## <sup>13</sup>C-NMR

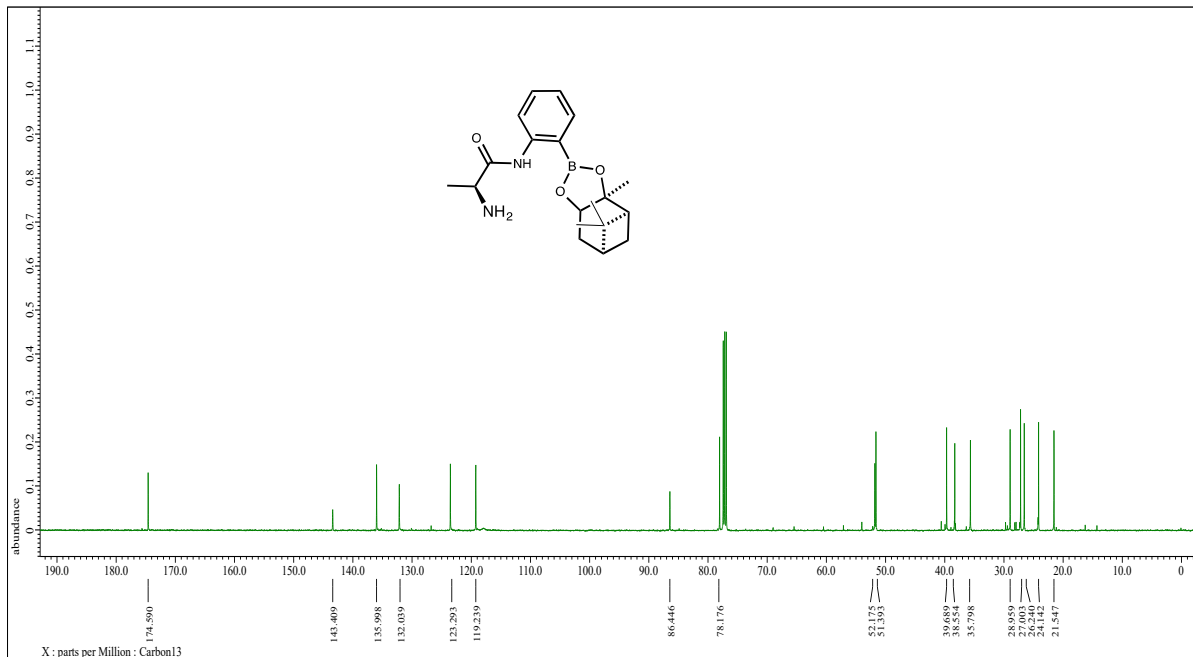

# (S)-2-Amino-N-( (+)-2,3-pinandediol phenyl boronate)-2-phenylethanamide

## <sup>1</sup>H-NMR

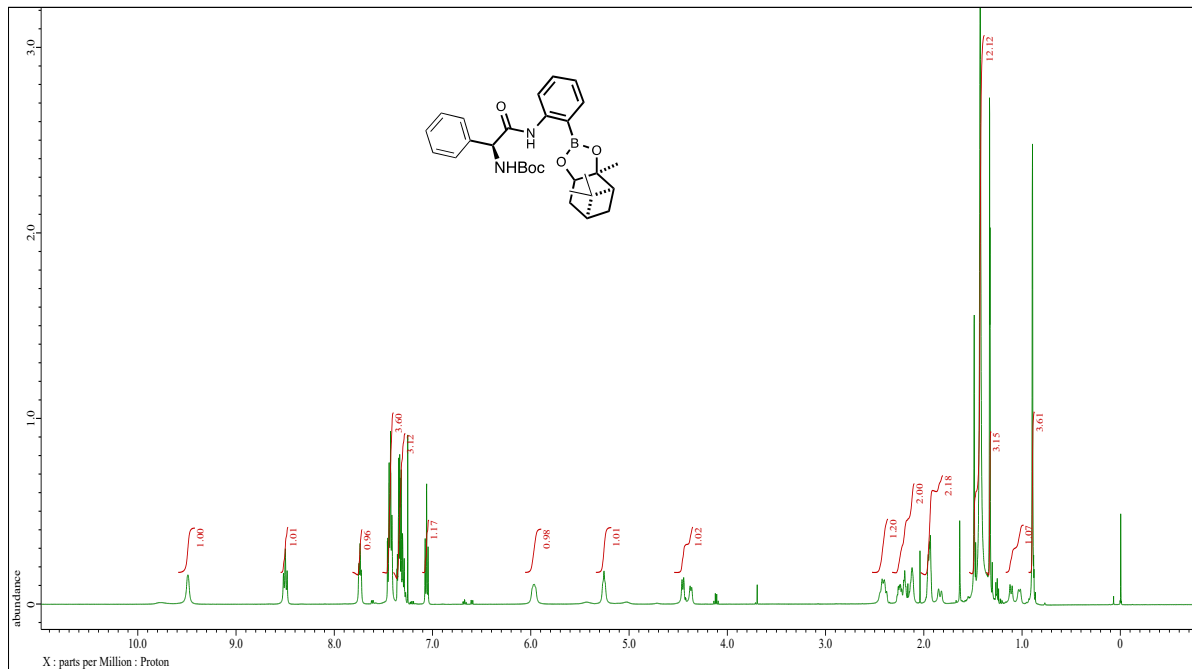

## <sup>13</sup>C-NMR

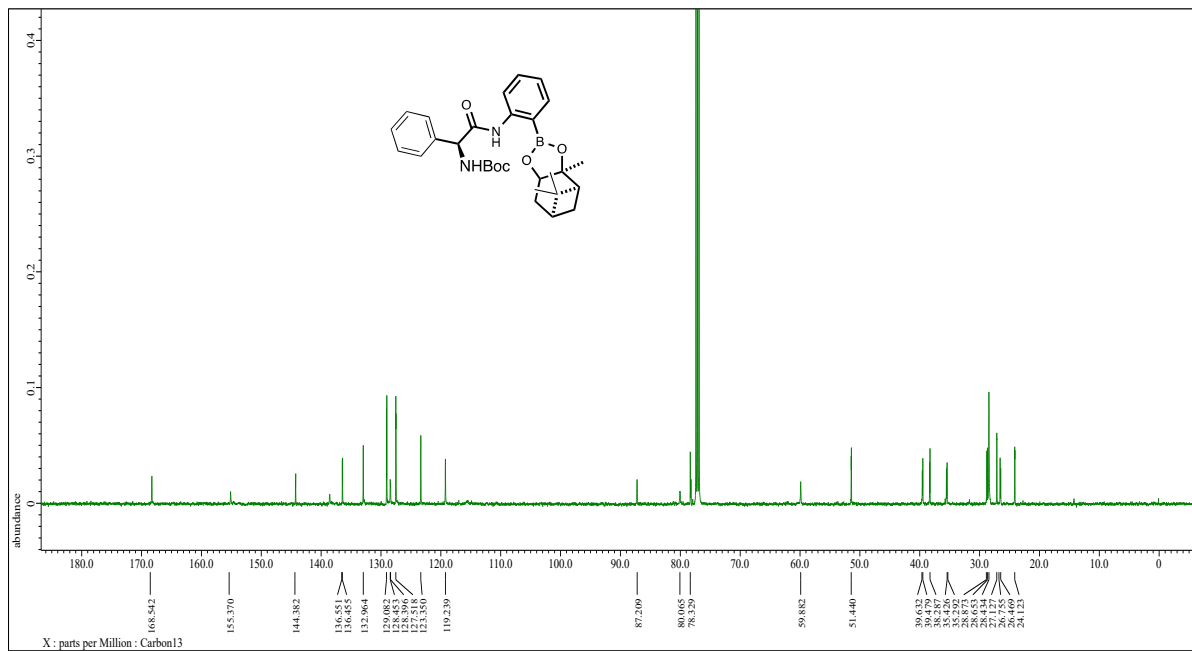

# (S)-2-Amino-N-( (+)-2,3-pinandediol phenyl boronate)-2-phenylethanamide

## <sup>1</sup>H-NMR

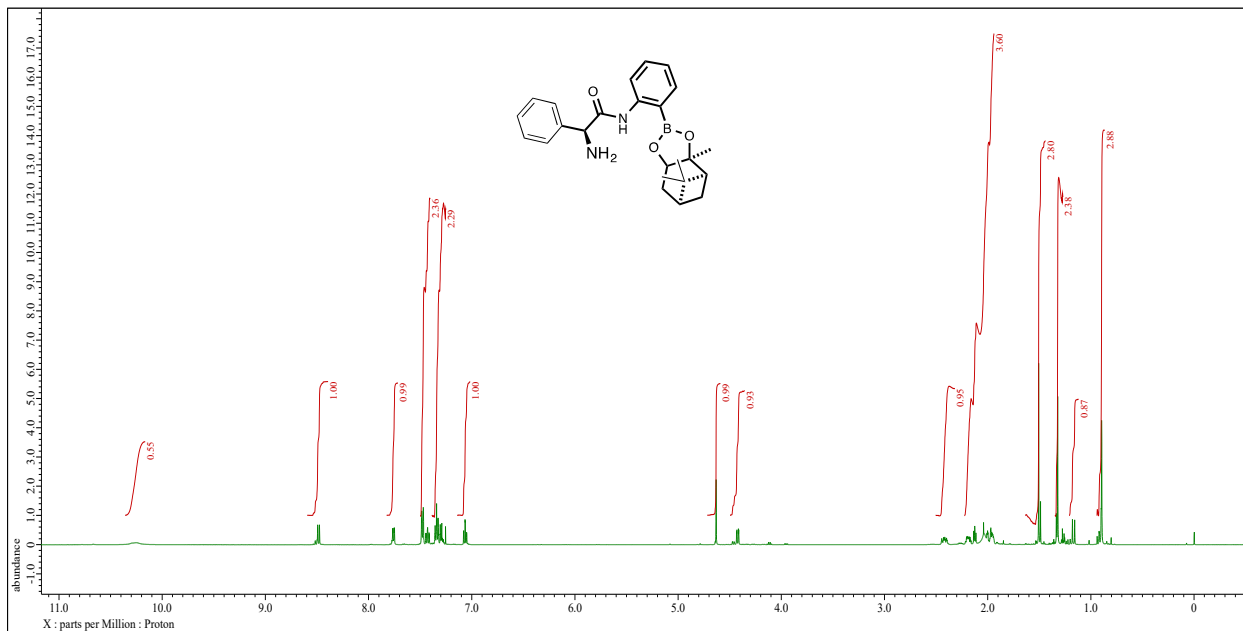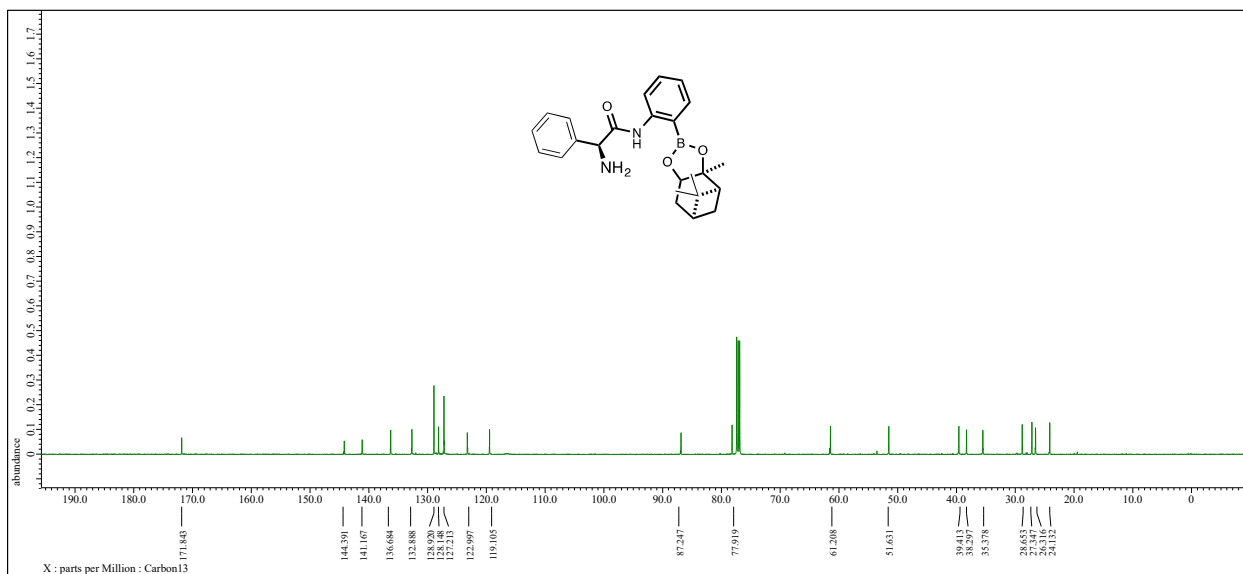

# (S)-2-Aminoboc-N-(+)-2,3-pinenediol phenyl boronate)-3-phenylpropanamide

## <sup>1</sup>H-NMR

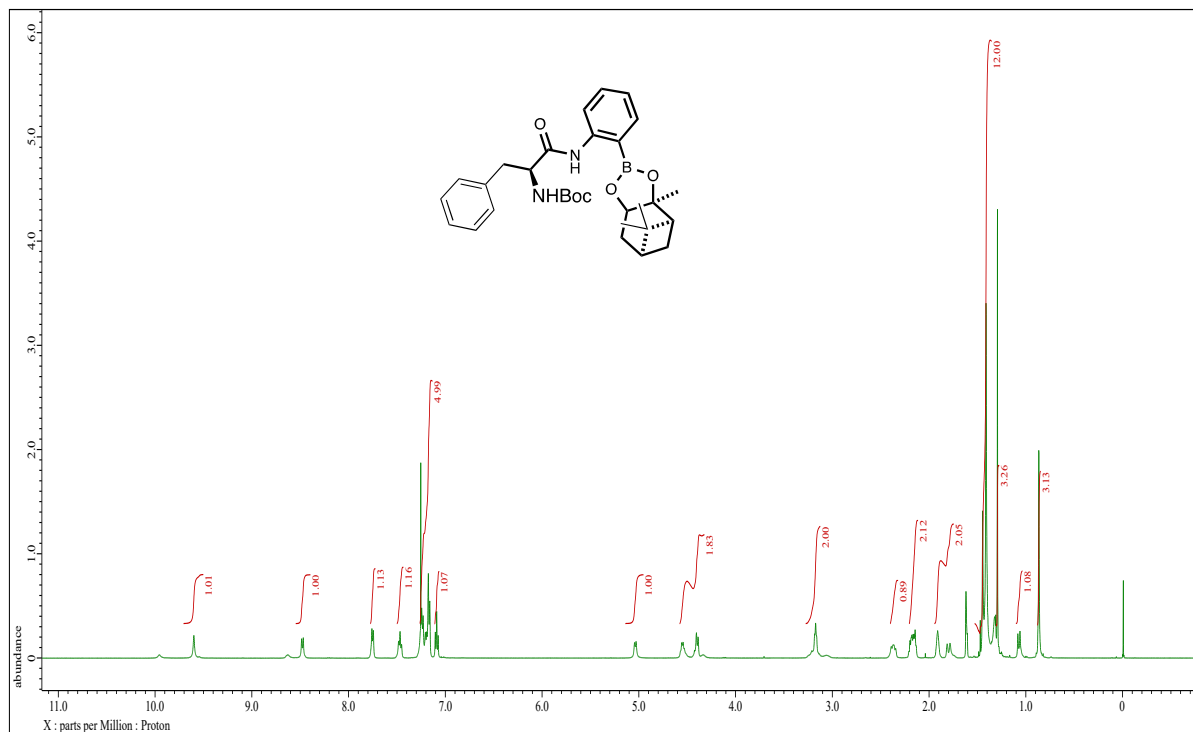

## <sup>13</sup>C-NMR

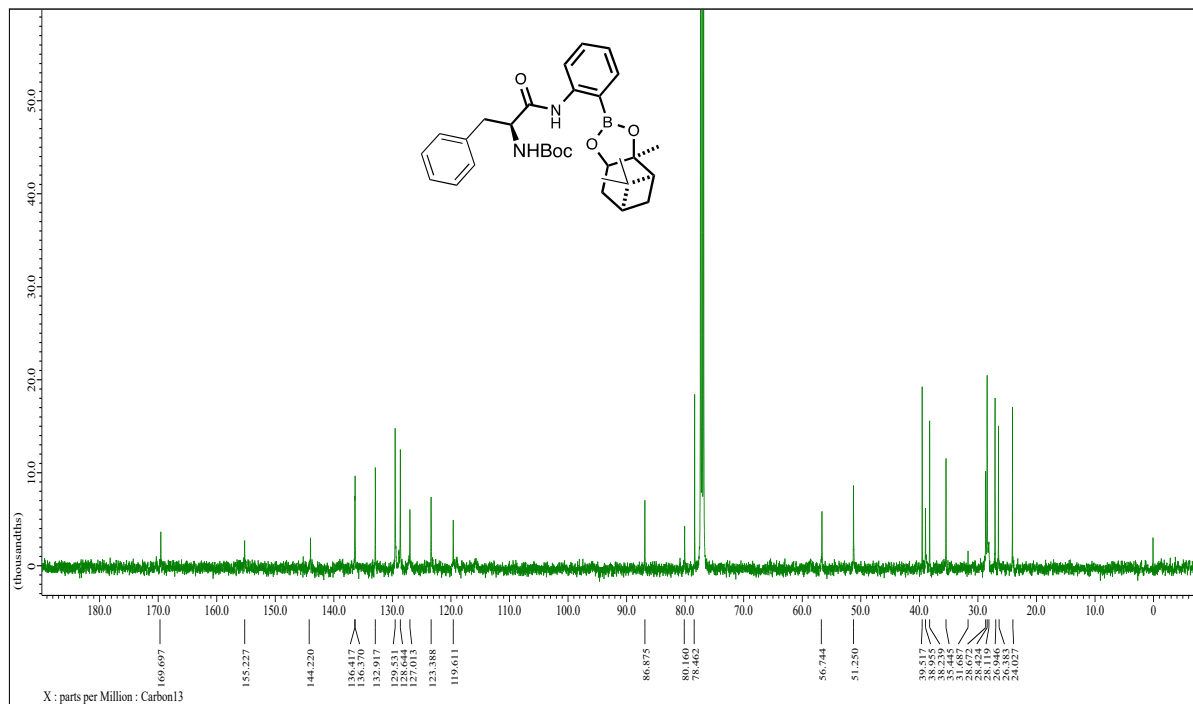

# (S)-2-Amino-N-(+)-2,3-pinandediol phenyl boronate)-3-phenylpropanamide

## <sup>1</sup>H-NMR

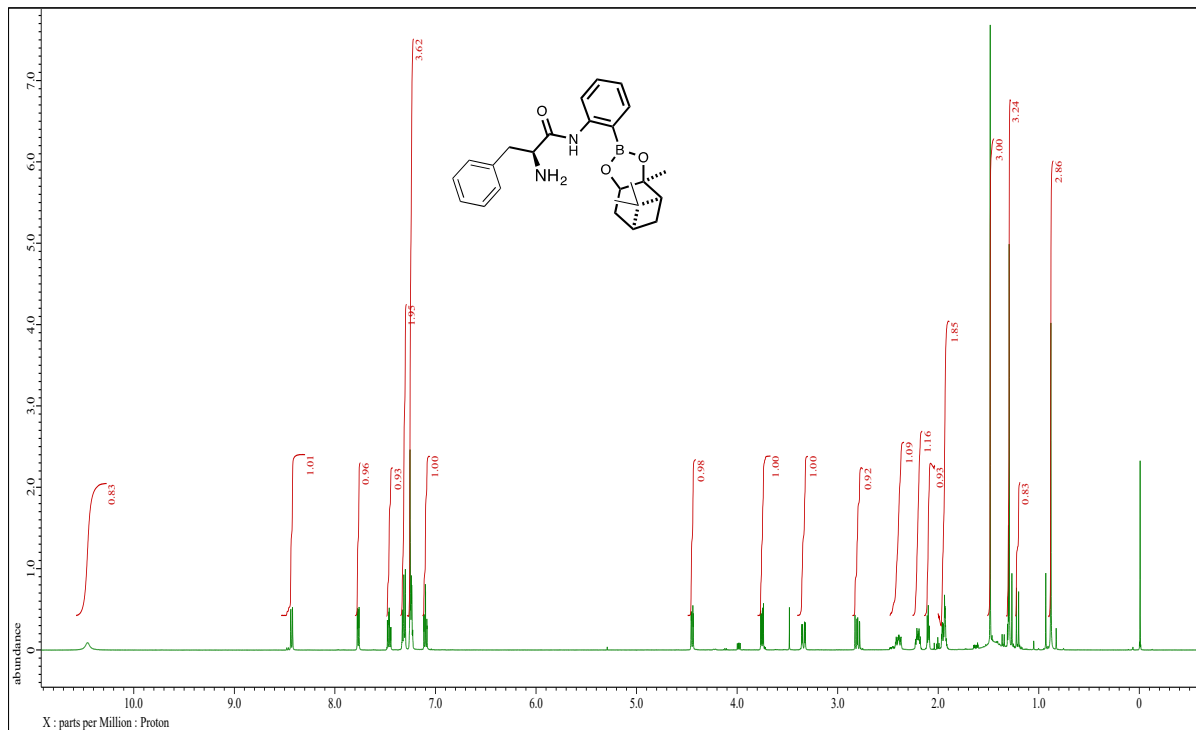

## <sup>13</sup>C-NMR

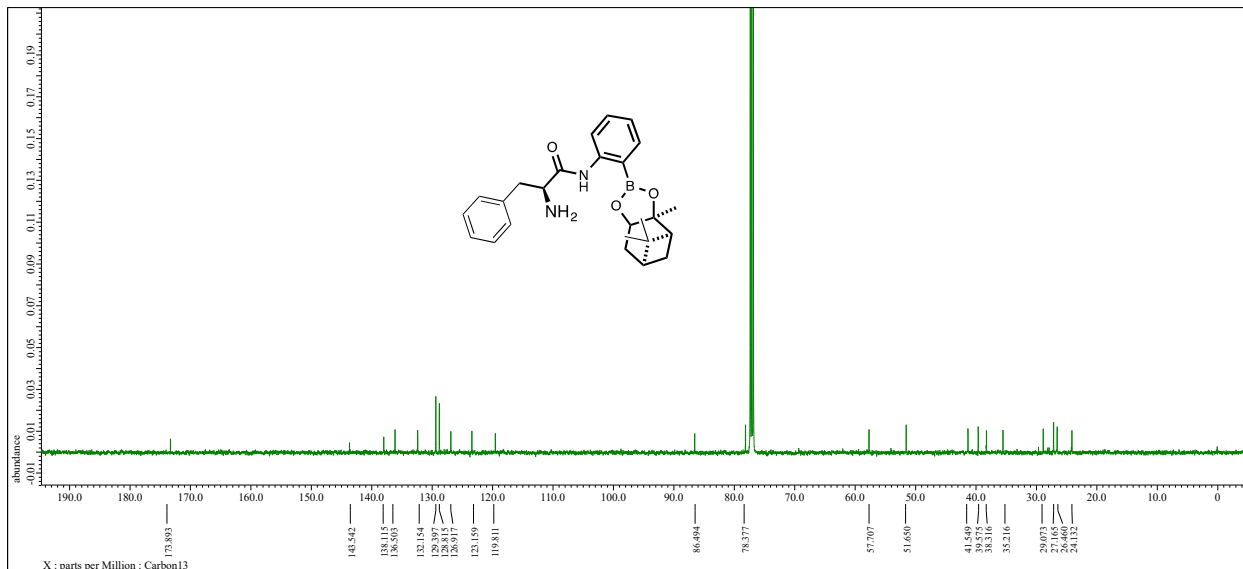



(S)-2-NBocpyrrolidine-N-(+)-2,3-pinandediol phenyl boronate)-carboxamide.

<sup>1</sup>H-NMR

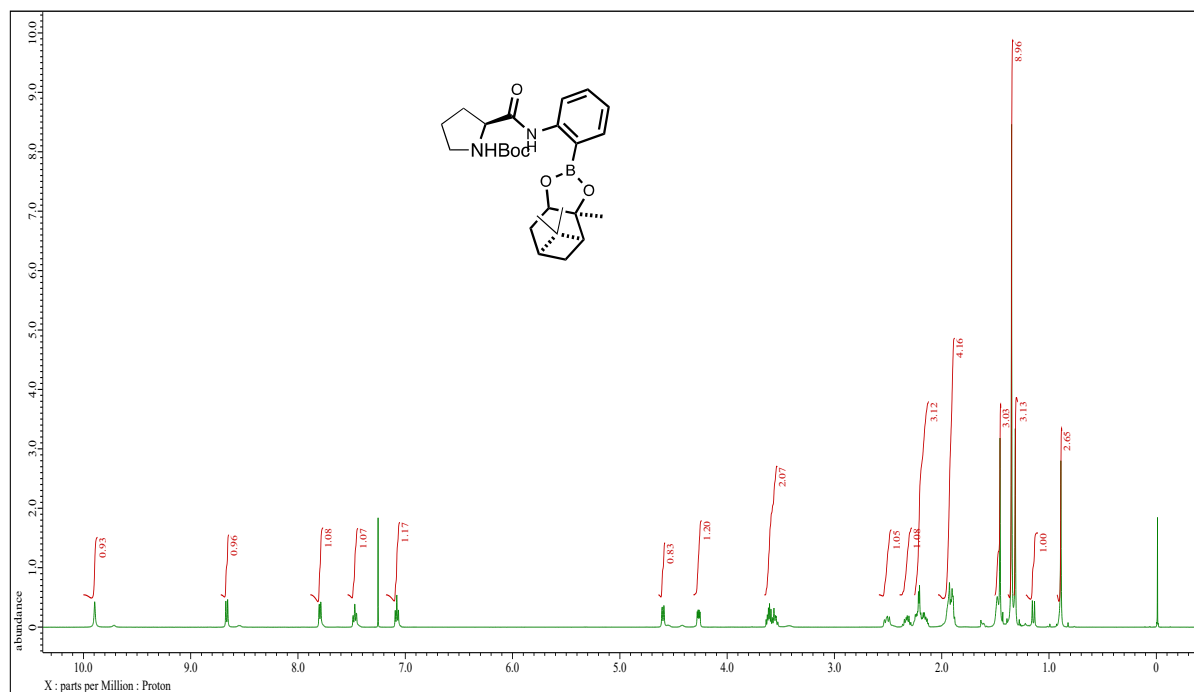

<sup>13</sup>C-NMR

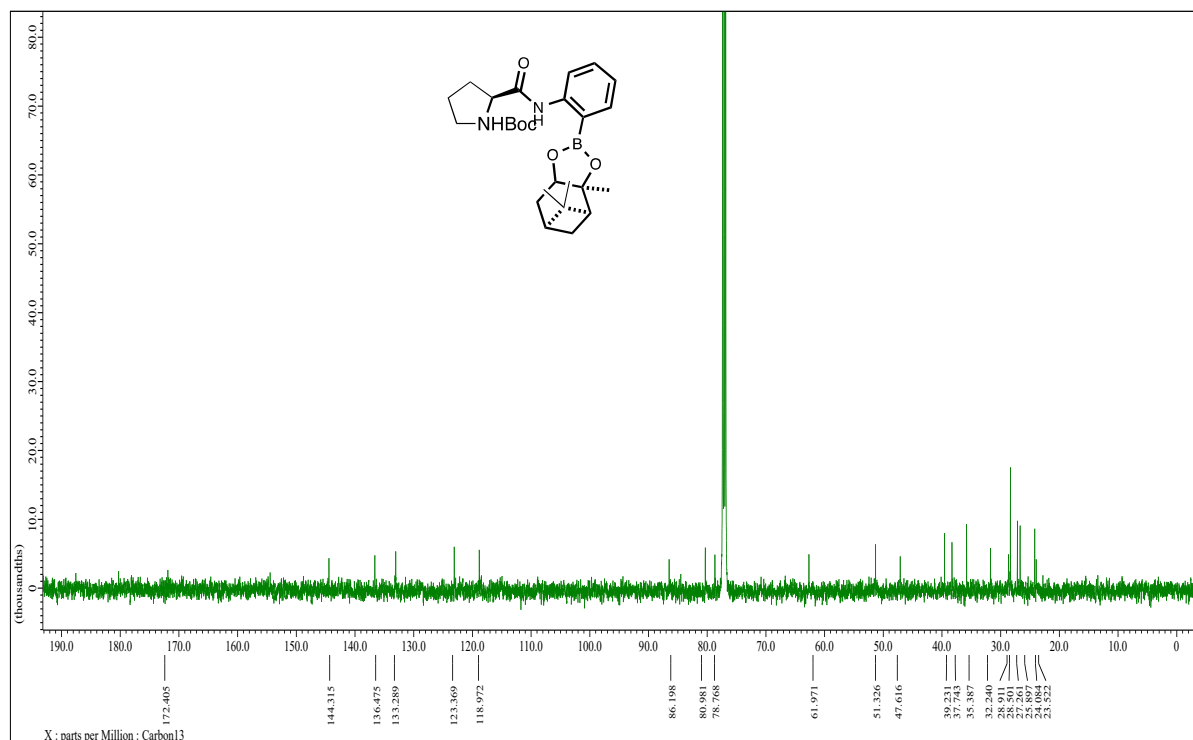

**(S)-2-pyrrolidine-N-((+)-2,3-pinandediol phenyl boronate)-carboxamide.**

**<sup>1</sup>H-NMR**

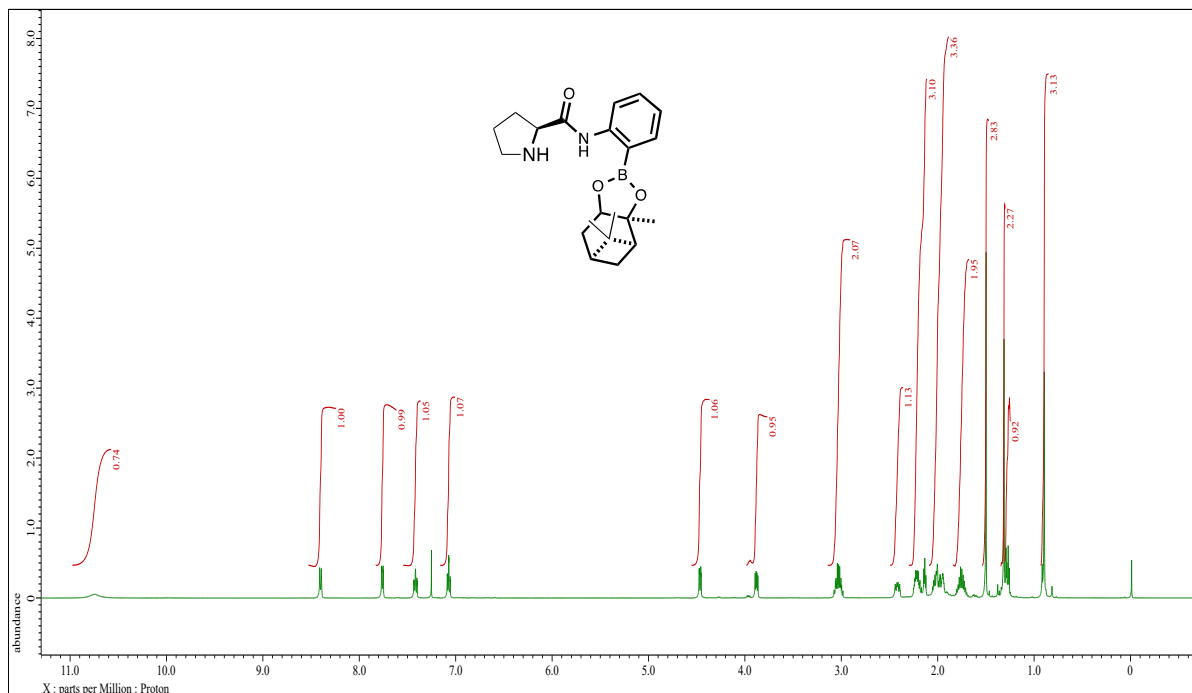

**<sup>13</sup>C-NMR**

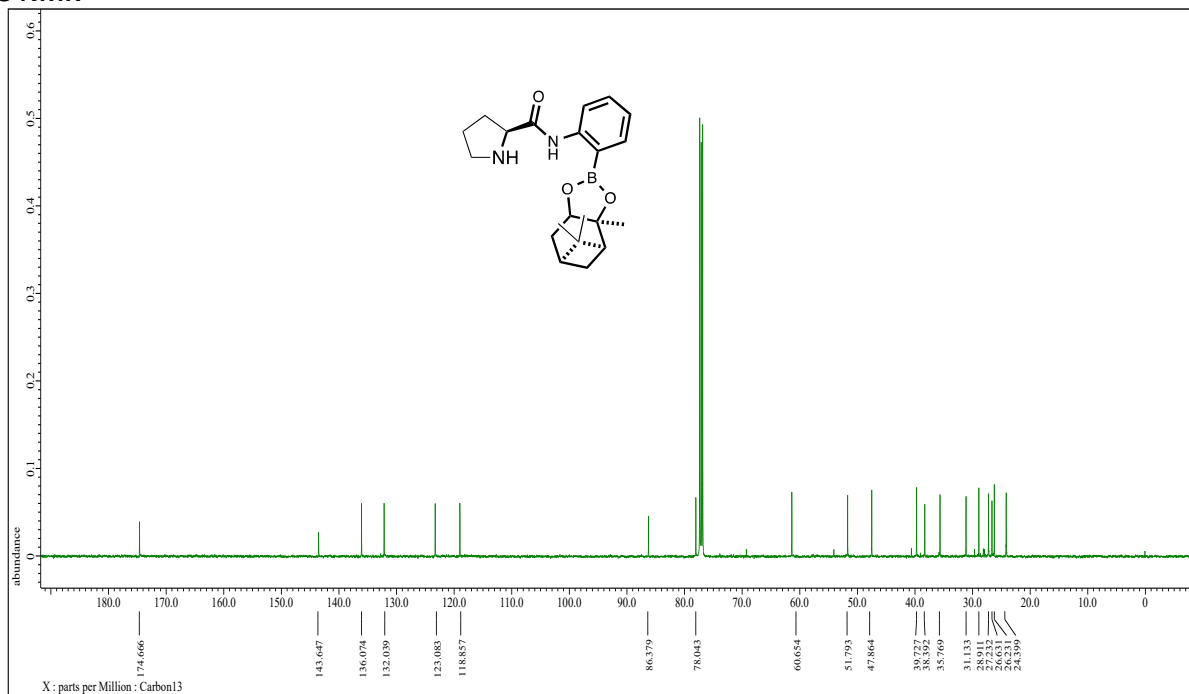



## H<sup>1</sup> NMR and Mass data of the Aldol products

### 2-[Hydroxy-(4-nitrophenyl)-methyl]-cyclohexan-1-one (**7a**)

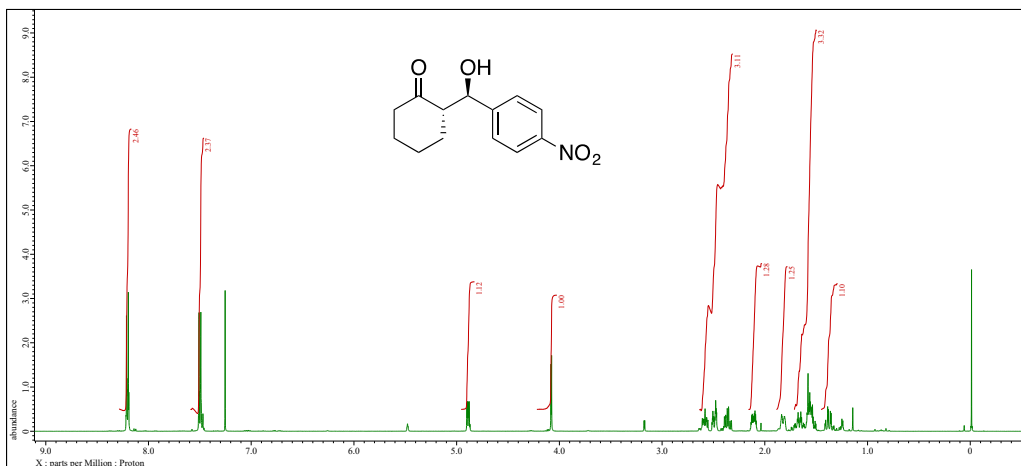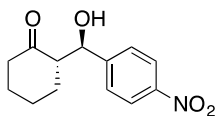

Chemical Formula: C<sub>13</sub>H<sub>15</sub>NO<sub>4</sub>  
Exact Mass: 249.1001

MS (EI)  $m/z$  : 249 [M]<sup>+</sup>,

HRMS  $m/z$ : [EI] calculated for C<sub>13</sub>H<sub>15</sub>N<sub>1</sub>O<sub>4</sub> [M]<sup>+</sup>: 249.1001; Found [M]<sup>+</sup>: 249.1006.

2-[Hydroxy-(3-nitrophenyl)-methyl]-cyclohexan-1-one (**7b**)

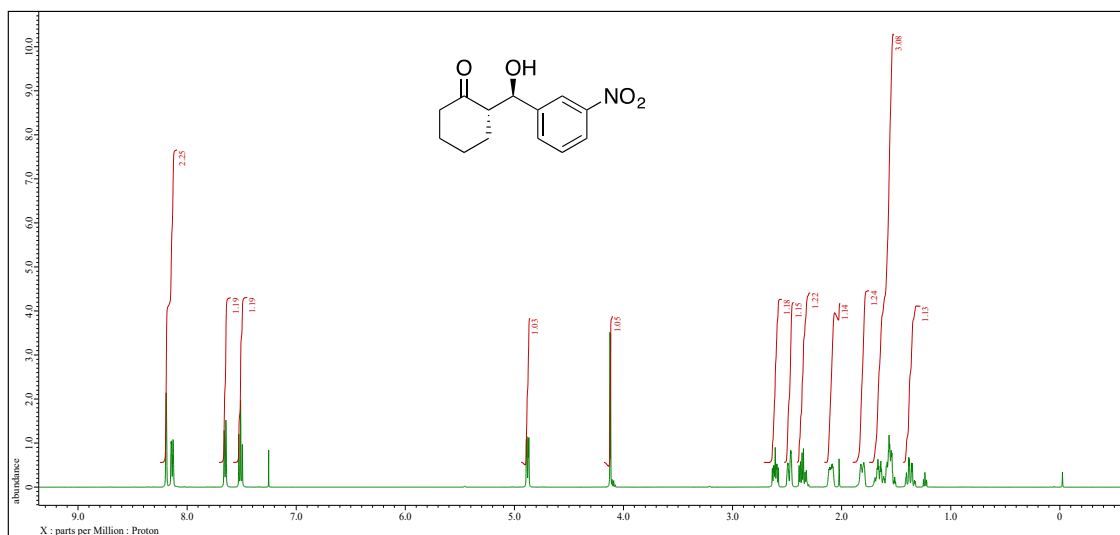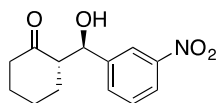

Chemical Formula: C<sub>13</sub>H<sub>15</sub>NO<sub>4</sub>  
Exact Mass: 249.1001

MS (EI)  $m/z$  : 249 [M]<sup>+</sup>,

HRMS  $m/z$ : [EI] calculated for C<sub>13</sub>H<sub>15</sub>N<sub>1</sub>O<sub>4</sub> [M]<sup>+</sup>: 249.1001, Found [M]<sup>+</sup>: 249.1006.

2-[Hydroxy-(3-nitrophenyl)-methyl]-cyclohexan-1-one (**7c**)

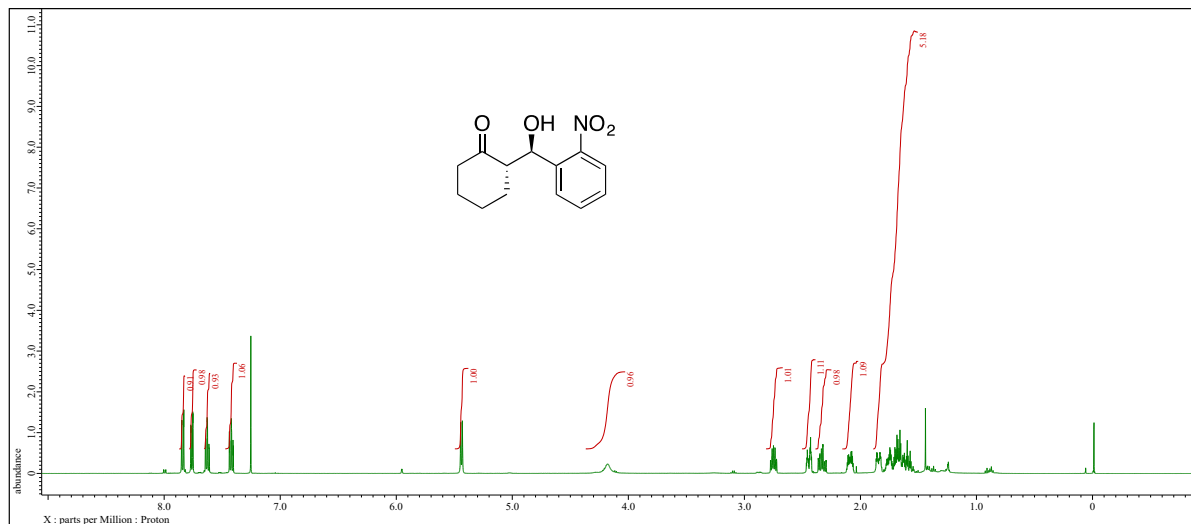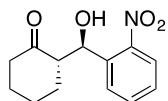

Chemical Formula:  $C_{13}H_{15}NO_4$   
Exact Mass: 249.1001

MS (EI)  $m/z$  : 249  $[M]^+$ ,

HRMS  $m/z$ : [EI] calculated for  $C_{13}H_{15}N_1O_4$   $[M]^+$ : 249.1001, Found  $[M]^+$ : 249.1005.

2-[Hydroxy-(4-chlorophenyl)-methyl]-cyclohexan-1-one (**7d**)

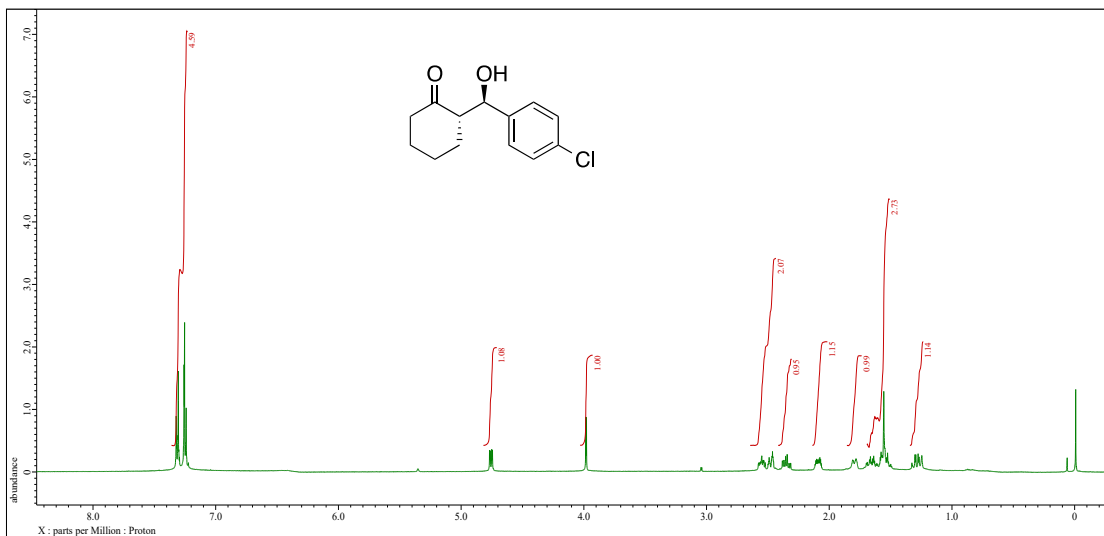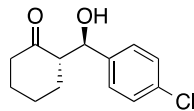

Chemical Formula:  $C_{13}H_{15}ClO_2$   
Exact Mass: 238.0761

MS (EI)  $m/z$  : 238  $[M]^+$ ,

HRMS  $m/z$ : [EI] calculated for  $C_{13}H_{15}ClO_2$   $[M]^+$ : 238.0761; Found 238.0752 and  $[M+2]$  240.0721

2-[Hydroxy-(4-bromophenyl)-methyl]-cyclohexan-1-one (**7e**)

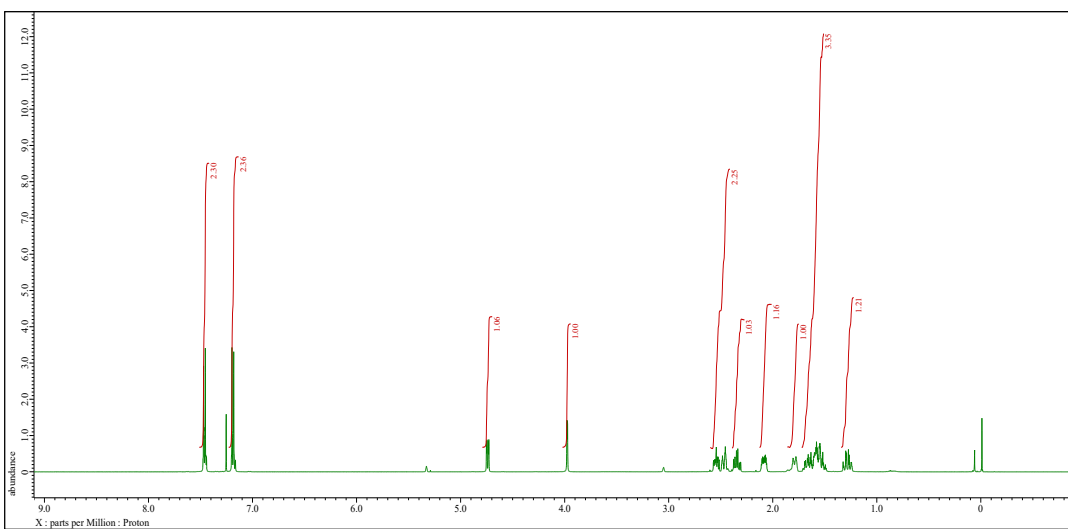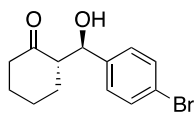

Chemical Formula:  $C_{13}H_{15}BrO_2$   
Exact Mass: 282.0255

MS (EI)  $m/z$  : 282  $[M]^+$ ,

HRMS  $m/z$ : [EI] calculated for  $C_{13}H_{15}BrO_2$   $[M]^+$ : 282.0255; Found  $[M]^+$ : 282.0259 and  $[M+2]$  284.0231



2-[Hydroxy-(4-cyanophenyl)-methyl]-cyclohexan-1-one (**7f**)

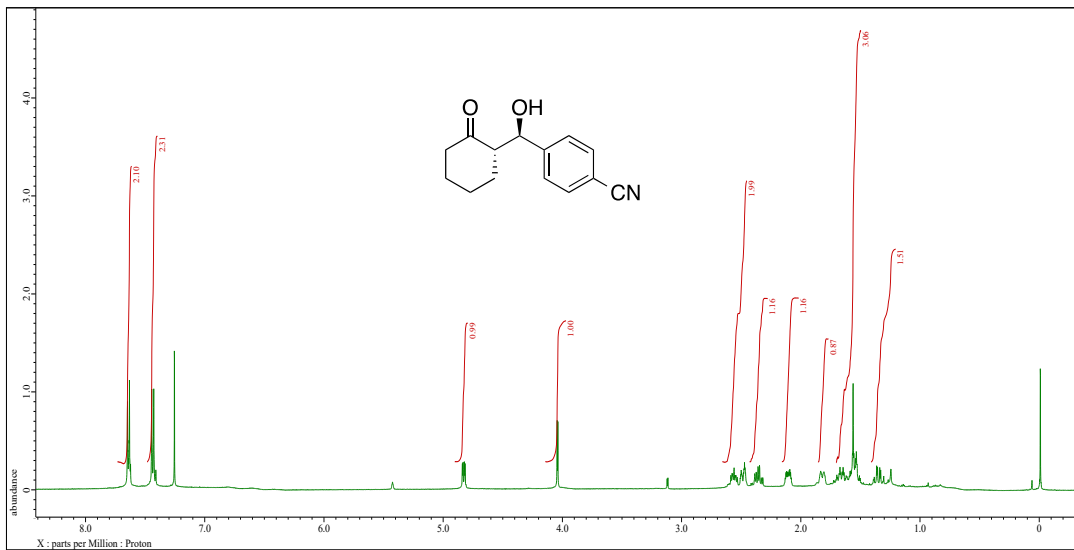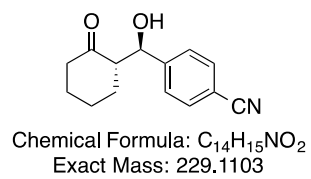

MS (EI)  $m/z$  : 229 [M]<sup>+</sup>,

HRMS  $m/z$ : [EI] calculated for C<sub>14</sub>H<sub>15</sub>NO<sub>2</sub> [M]<sup>+</sup>: 229.1103, Found [M]<sup>+</sup>: 229.1107

2-[Hydroxy-(3-methoxyphenyl)-methyl]-cyclohexan-1-one (**7g**)

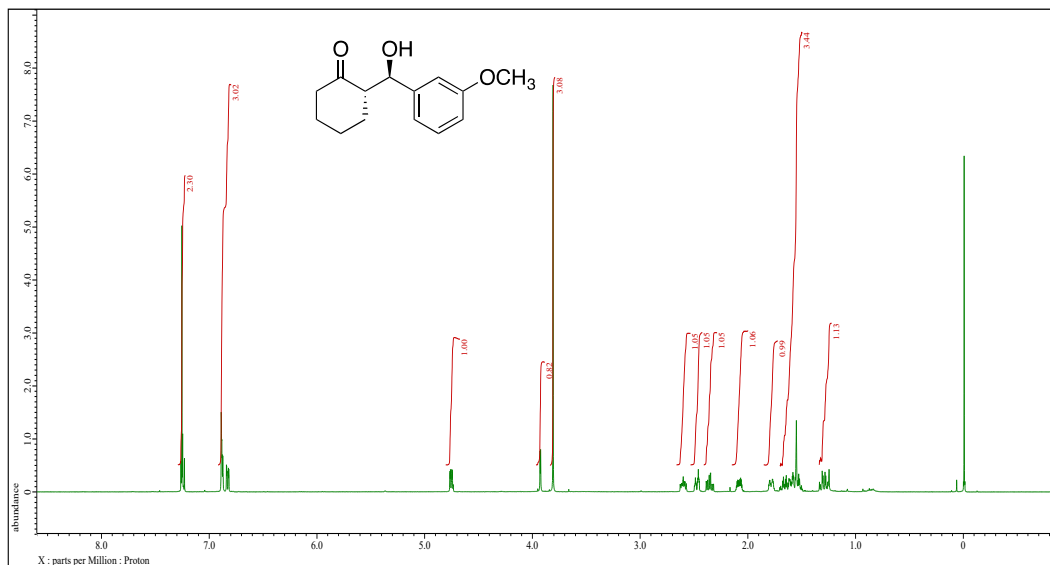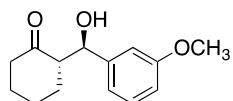

Chemical Formula:  $C_{14}H_{18}O_3$   
Exact Mass: 234.1256

MS (EI)  $m/z$  : 234  $[M]^+$ ,

HRMS  $m/z$ : [EI] calculated for  $C_{14}H_{18}O_3$   $[M]^+$ : 234.1256, Found  $[M]^+$ : 234.1251

2-[Hydroxy-(4-methylphenyl)-methyl]-cyclohexan-1-one (**7h**)

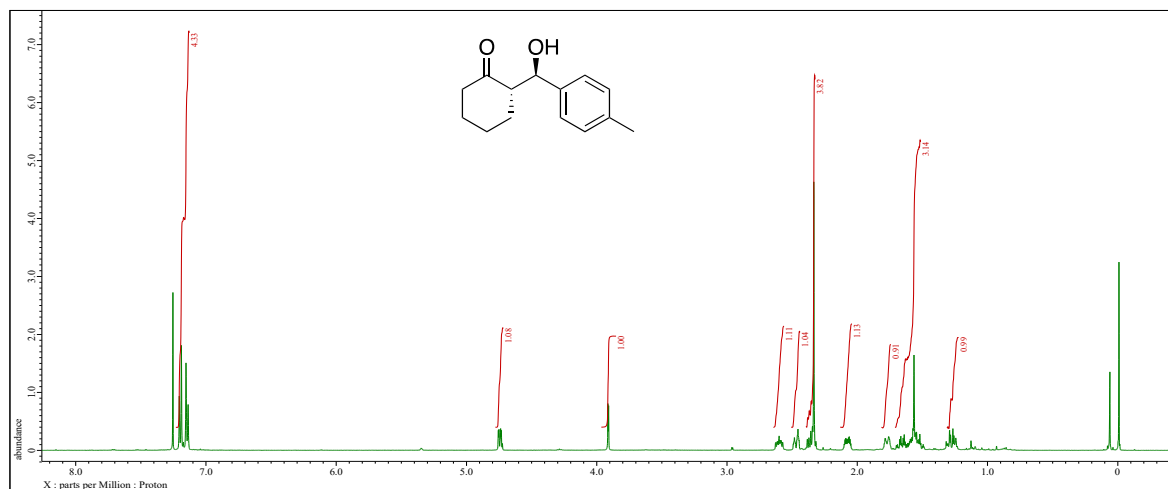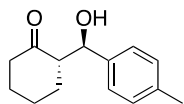

Chemical Formula:  $C_{14}H_{18}O_2$   
Exact Mass: 218.1307

MS (EI)  $m/z$  : 218  $[M]^+$ ,

HRMS  $m/z$ : [EI] calculated for  $C_{14}H_{18}O_2$   $[M]^+$ : 218.1307, Found  $[M+1]^+$ : 218.1396

2-[Hydroxy-(phenyl)-methyl]-cyclohexan-1-one (**7i**)

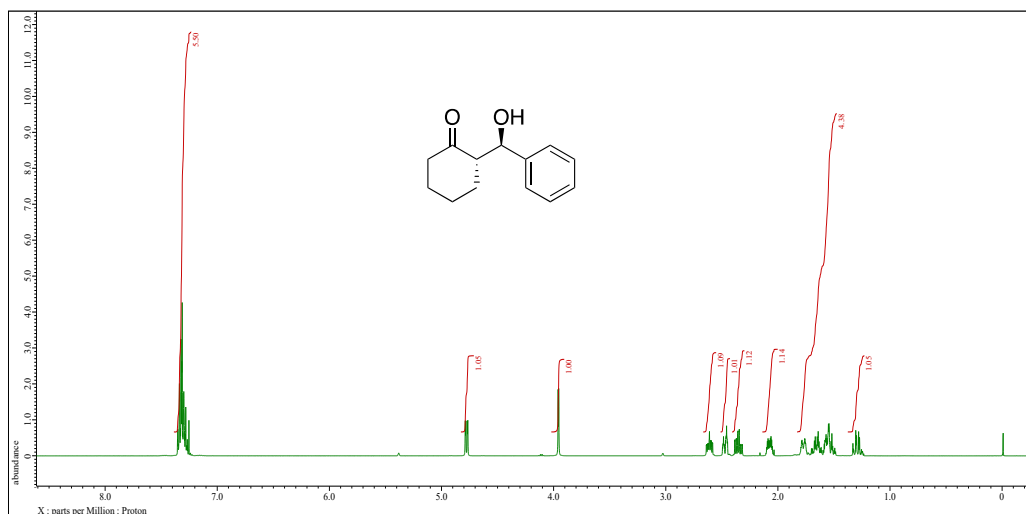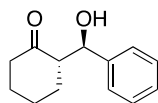

Chemical Formula:  $C_{13}H_{16}O_2$   
Exact Mass: 204.1150

MS (EI)  $m/z$  : 204  $[M]^+$ ,

HRMS  $m/z$ : [EI] calculated for  $C_{14}H_{18}O_3$   $[M]^+$ : 204.1150, Found  $[M]^+$ : 204.1151

2-[Hydroxy-(naphthyl)-methyl]-cyclohexan-1-one (**7j**)

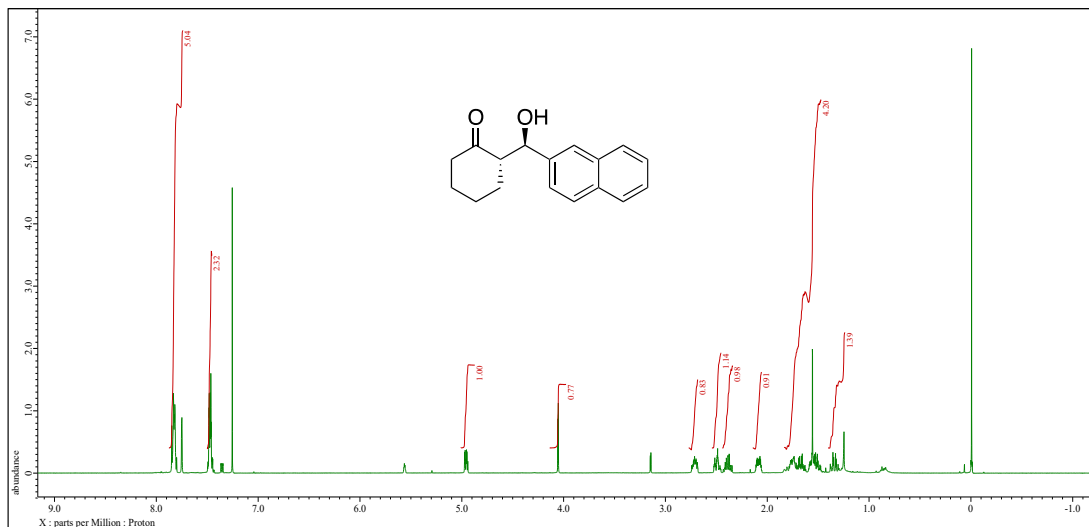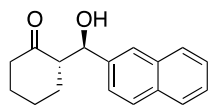

Chemical Formula:  $C_{17}H_{18}O_2$   
Exact Mass: 254.1307

MS (EI)  $m/z$  : 254  $[M]^+$ ,

HRMS  $m/z$ : [EI] calculated for  $C_{14}H_{18}O_3$   $[M]^+$ : 254.1307, Found  $[M]^+$ : 254.1315

2-[Hydroxy-(4-nitrophenyl)-methyl]-cyclopentan-1-one (**7k**)

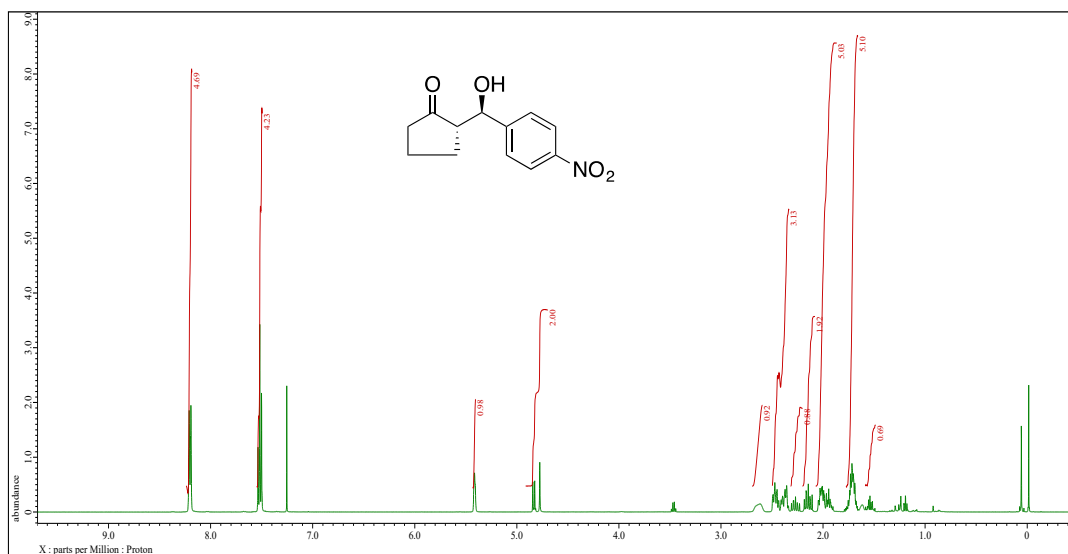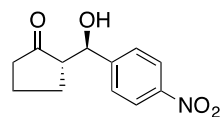

Chemical Formula: C<sub>12</sub>H<sub>13</sub>NO<sub>4</sub>  
Exact Mass: 235.0845

MS (EI)  $m/z$  : 254 [M]<sup>+</sup>,

HRMS  $m/z$ : [EI] calculated for C<sub>12</sub>H<sub>13</sub>NO<sub>4</sub> [M]<sup>+</sup>: 235.0845, Found [M]<sup>+</sup>: 235.0837

2-[Hydroxy-(3-nitrophenyl)-methyl]-cyclopentan-1-one (**7I**)

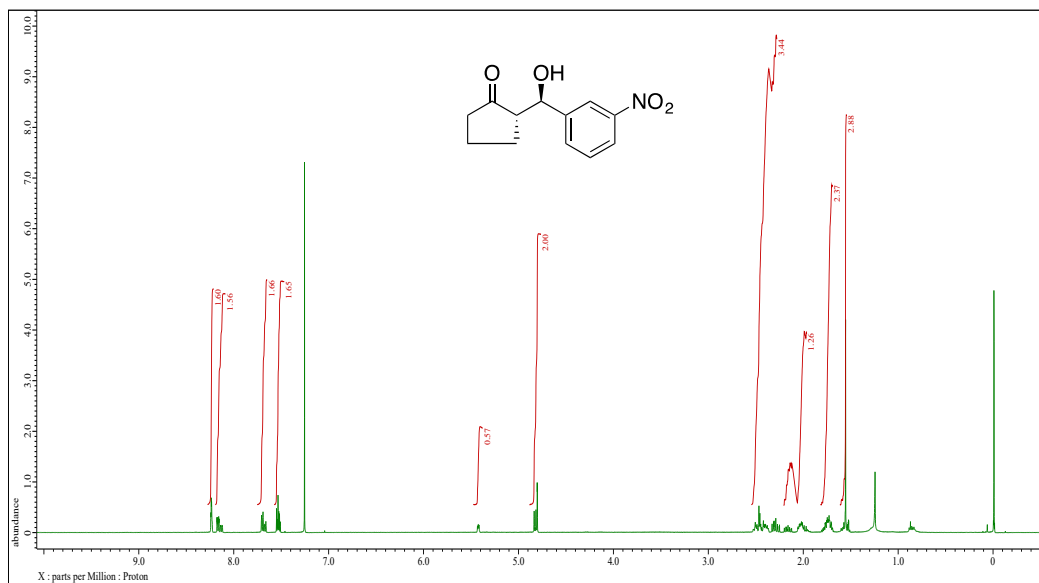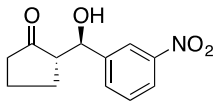

Chemical Formula:  $C_{12}H_{13}NO_4$   
Exact Mass: 235.0845

MS (EI)  $m/z$  : 235  $[M]^+$ ,

HRMS  $m/z$ : [EI] calculated for  $C_{12}H_{13}NO_4$   $[M]^+$ : 235.0845, Found  $[M]^+$ : 235.0849

2-[Hydroxy-(4-nitrophenyl)-methyl]-cycloheptan-1-one(7m)

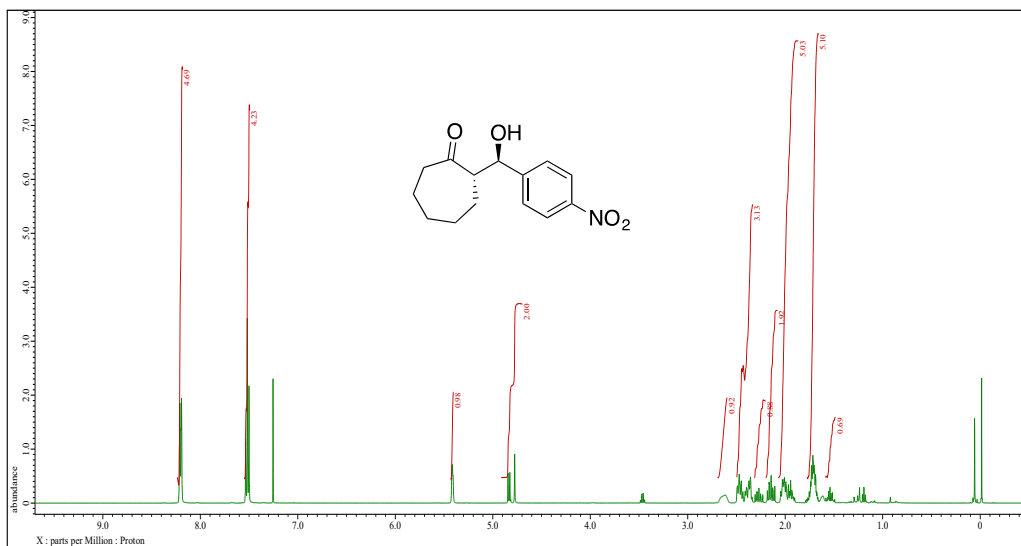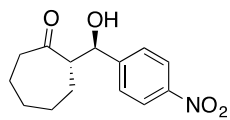

Chemical Formula:  $C_{14}H_{17}NO_4$   
Exact Mass: 263.1158

MS (EI)  $m/z$  : 263  $[M]^+$ ,

HRMS  $m/z$ : [EI] calculated for  $C_{14}H_{17}NO_4$   $[M]^+$ : 263.1158, Found  $[M]^+$ : 263.1155



2-[Hydroxy-(4-nitrophenyl)-methyl]-4-methylcyclohexan-1-one(7n)

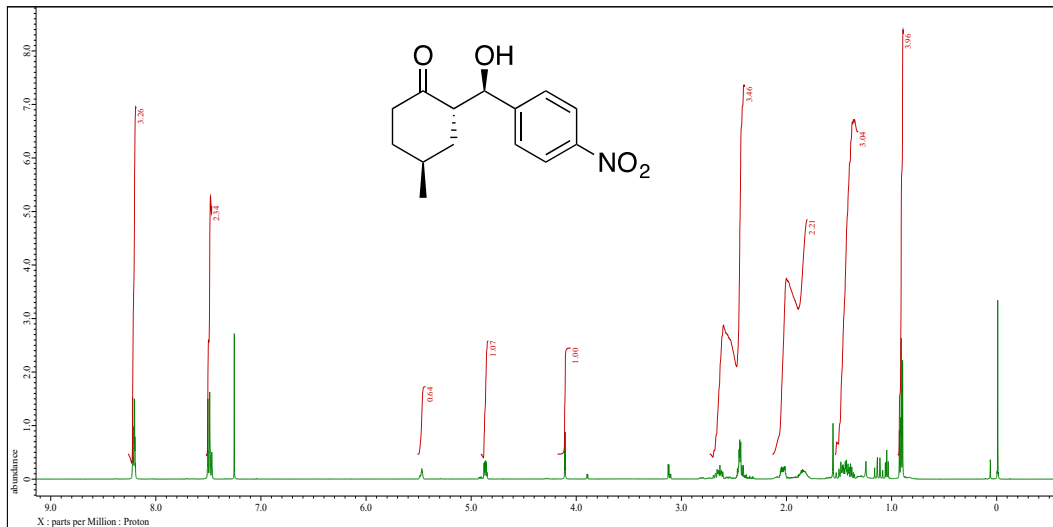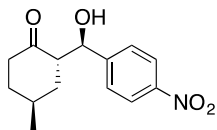

Chemical Formula: C<sub>14</sub>H<sub>17</sub>NO<sub>4</sub>  
Exact Mass: 263.1158

MS (EI) *m/z* : 263 [M]<sup>+</sup>,

HRMS *m/z*: [EI] calculated for C<sub>14</sub>H<sub>17</sub>NO<sub>4</sub> [M]<sup>+</sup>: 263.1158, Found [M]<sup>+</sup>: 263.1153

2-[Hydroxy-(4-nitrophenyl)-methyl]-dihydro-2H-pyran-4-one (**7o**)

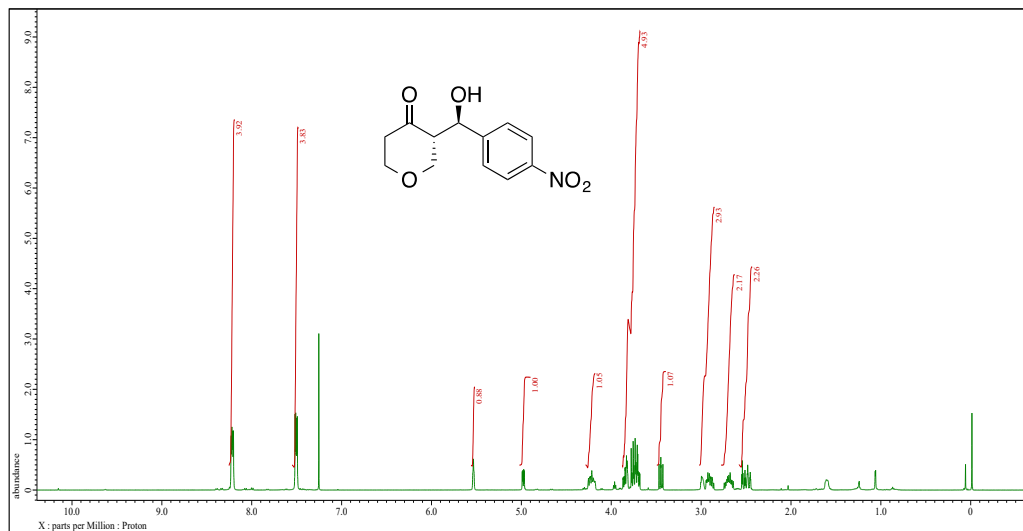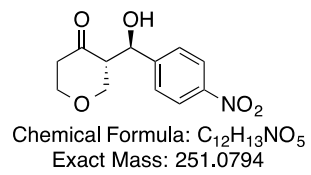

MS (EI)  $m/z$  : 251  $[M]^+$ ,

HRMS  $m/z$ : [EI] calculated for  $C_{12}H_{13}NO_5$   $[M]^+$ : 251.0794, Found  $[M]^+$ : 251.0796

3-Hydroxy-3-(4-nitrophenyl)-1-phenylpropan-1-one (**7p**)

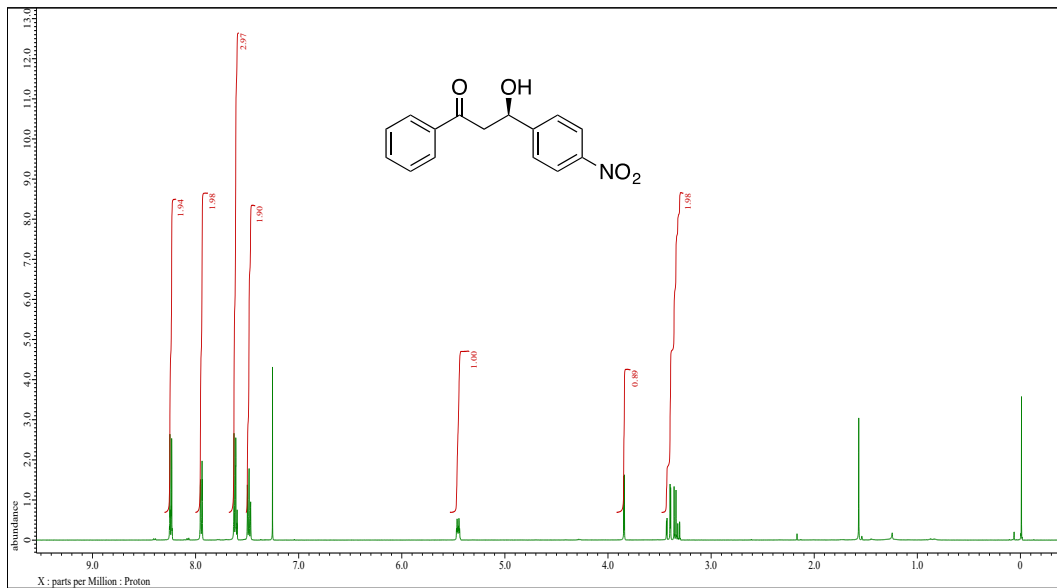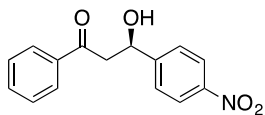

Chemical Formula:  $C_{15}H_{13}NO_4$   
Exact Mass: 271.0845

MS (EI)  $m/z$  : 271  $[M]^+$ ,

HRMS  $m/z$ : [EI] calculated for  $C_{15}H_{13}NO_4$   $[M]^+$ : 271.0845, Found  $[M]^+$ : 271.0848

3-Hydroxy-3-(4-nitrophenyl)-1-propylpropan-1-one (**7q**)

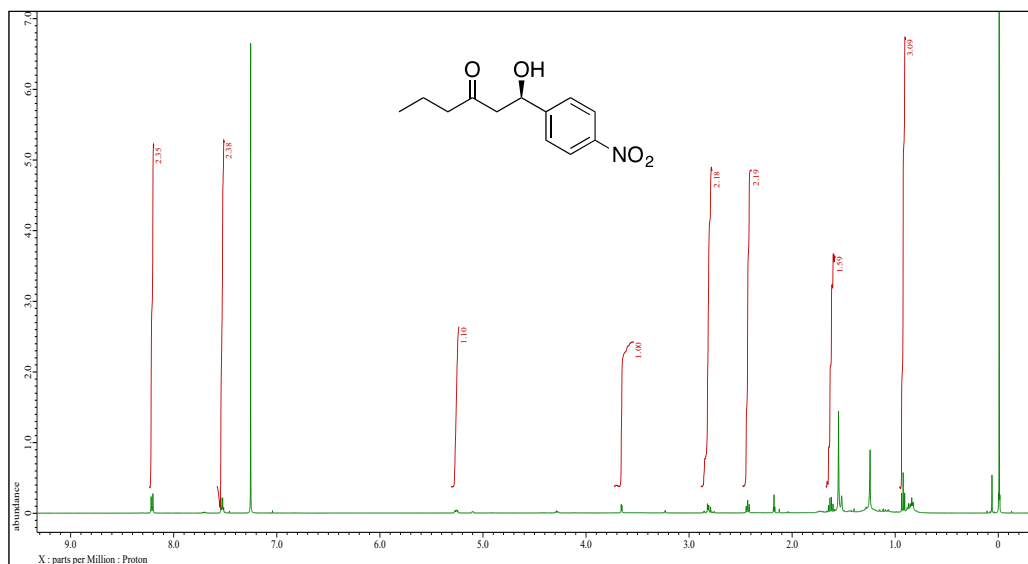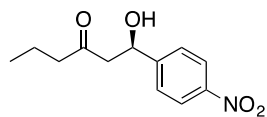

Chemical Formula: C<sub>12</sub>H<sub>15</sub>NO<sub>4</sub>  
Exact Mass: 237.1001

MS (EI)  $m/z$  : 237 [M]<sup>+</sup>,

HRMS  $m/z$ : [EI] calculated for C<sub>12</sub>H<sub>15</sub>NO<sub>4</sub> [M]<sup>+</sup>: 237.1001, Found [M]<sup>+</sup>: 237.1004

3-Hydroxy-3-(4-nitrophenyl)-2,3-dimethylpropan-1-one (**7r**)

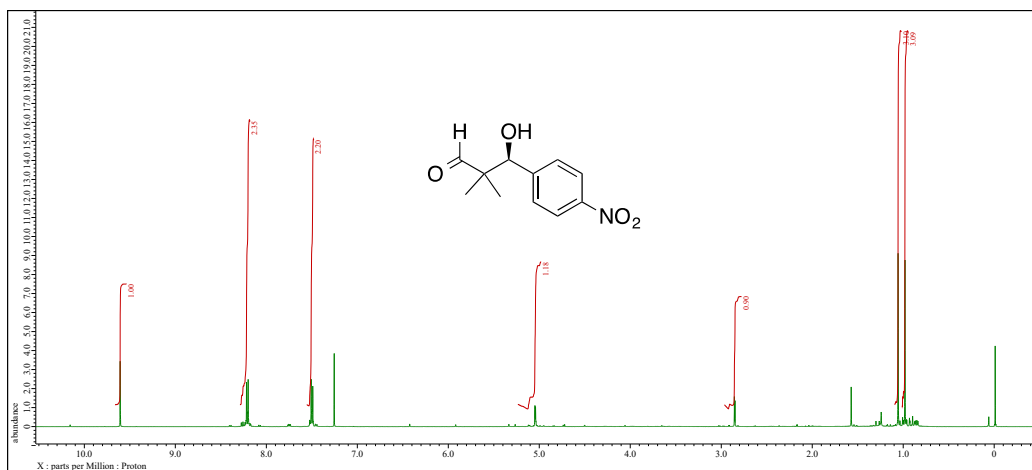

## 5. HPLC SPECTRA FOR ALDOL PRODUCTS

2-[Hydroxy-(4-nitrophenyl)-methyl]-cyclohexan-1-one (**7a**): AD-H column, *n*-hexane/*iso*-propanol = 90/10, flow rate = 1.0 mL/min,  $\lambda=254$  nm, 94% ee

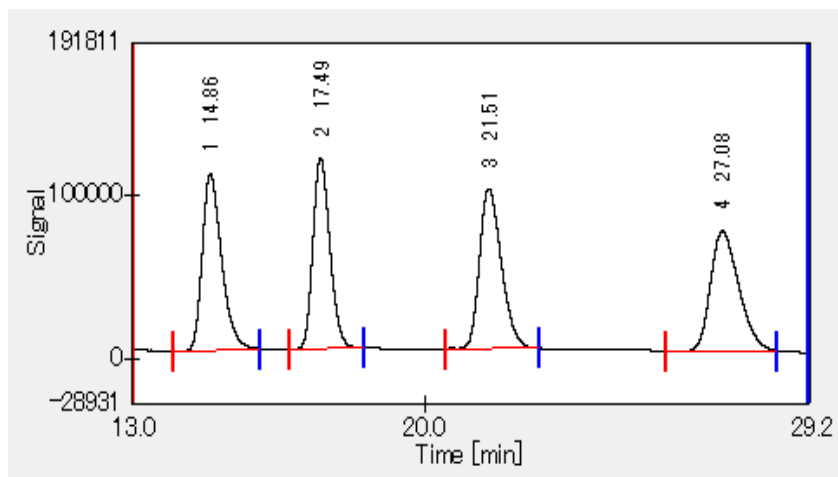

| No | Rt(min) | Area     | Area%   | Height | NTP    | Symmetry | Resolution |
|----|---------|----------|---------|--------|--------|----------|------------|
| 1  | 14.86   | 3433024  | 25.1286 | 107483 | 4692.4 | 1.383    | 3.243      |
| 2  | 17.49   | 3293264  | 24.1056 | 116990 | 8616.9 | 1.221    | 4.659      |
| 3  | 21.51   | 3528271  | 25.8258 | 97740  | 7861.7 | 1.293    | 5.003      |
| 4  | 27.08   | 3407248  | 24.94   | 73146  | 7420.4 | 1.314    | *****      |
|    |         | 13661806 | 100     | 395359 |        |          |            |

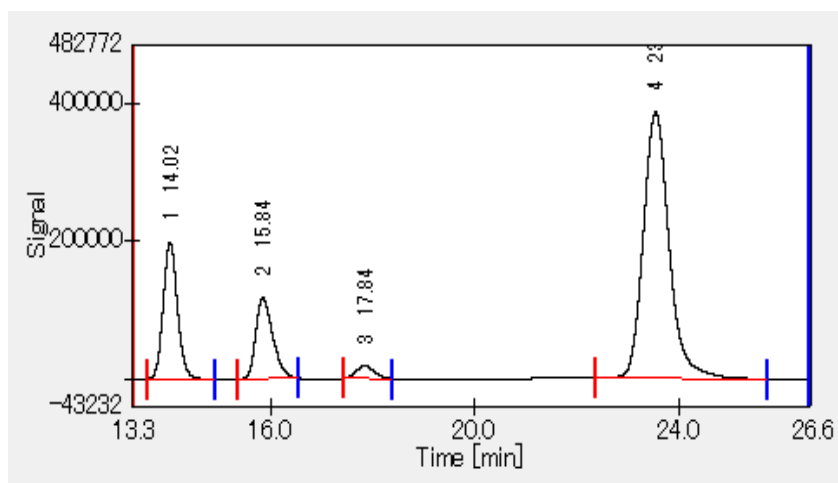

| No | Rt(min) | Area     | Area%   | Height | NTP     | Symmetry | Resolution |
|----|---------|----------|---------|--------|---------|----------|------------|
| 1  | 14.02   | 3822203  | 18.6025 | 198677 | 11710.5 | 1.119    | 3.162      |
| 2  | 15.84   | 2725808  | 13.2664 | 117306 | 10094.8 | 1.373    | 3.118      |
| 3  | 17.84   | 447108   | 2.1761  | 18551  | 12038.3 | 1.135    | 7.24       |
| 4  | 23.54   | 13551636 | 65.9551 | 387246 | 10356.2 | 1.195    | *****      |
|    |         | 20546755 | 100     | 721780 |         |          |            |

2-[Hydroxy-(3-nitrophenyl)-methyl]-cyclohexan-1-one (**7b**): AD-H column, *n*-hexane/*iso*-propanol = 90/10, flow rate = 1.0 mL/min,  $\lambda$ =254 nm, 57% ee

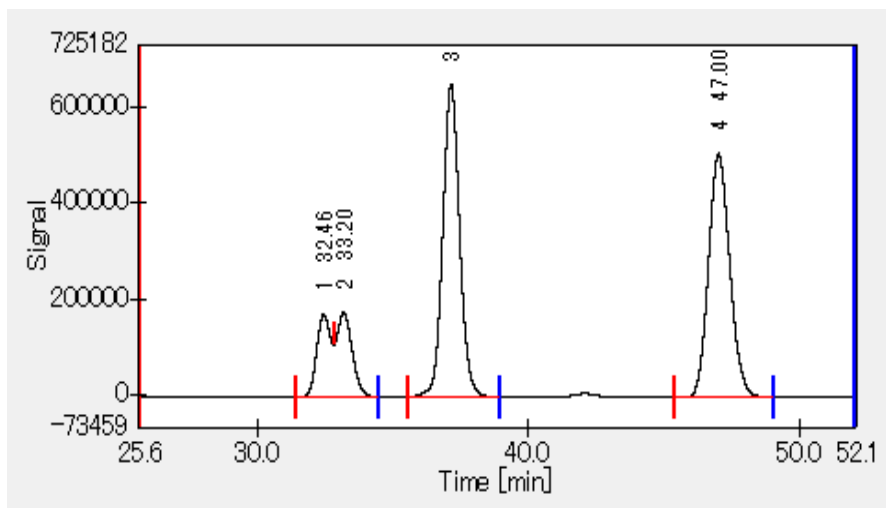

| No | Rt(min) | Area     | Area%   | Height  | NTP     | Symmetry | Resolution |
|----|---------|----------|---------|---------|---------|----------|------------|
| 1  | 32.46   | 6582385  | 9.5258  | 172614  | 16392.8 | *****    | 0.728      |
| 2  | 33.2    | 6704357  | 9.7024  | 176725  | 17323.7 | *****    | 3.664      |
| 3  | 37.15   | 28108368 | 40.6777 | 651659  | 16600.3 | 1.07     | 7.53       |
| 4  | 47      | 27705162 | 40.0941 | 508669  | 16531.8 | 1.129    | *****      |
|    |         | 69100272 | 100     | 1509667 |         |          |            |

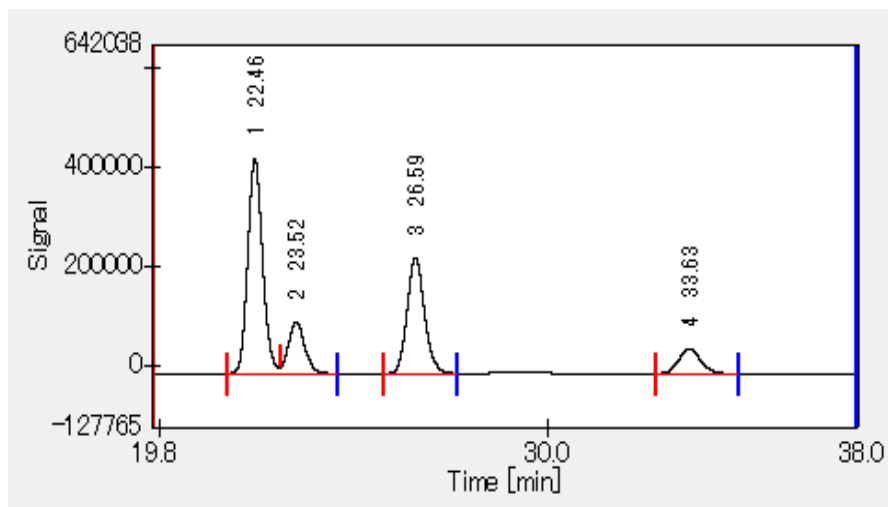

| No | Rt(min) | Area     | Area%   | Height | NTP     | Symmetry | Resolution |
|----|---------|----------|---------|--------|---------|----------|------------|
| 1  | 22.46   | 11431713 | 48.3788 | 431737 | 16270   | 1.135    | 1.448      |
| 2  | 23.52   | 2982209  | 12.6207 | 104312 | 15304.7 | *****    | 3.869      |
| 3  | 26.59   | 7254575  | 30.7012 | 232930 | 16026.7 | 1.126    | 7.42       |
| 4  | 33.63   | 1961091  | 8.2993  | 50503  | 16184.9 | 1.128    | *****      |
|    |         | 23629588 | 100     | 819482 |         |          |            |

2-[Hydroxy-(2-nitrophenyl)-methyl]-cyclohexan-1-one (**7c**): AD-H column, *n*-hexane/*iso*-propanol = 90/10, flow rate = 1.0 mL/min,  $\lambda=254$  nm, 44% ee

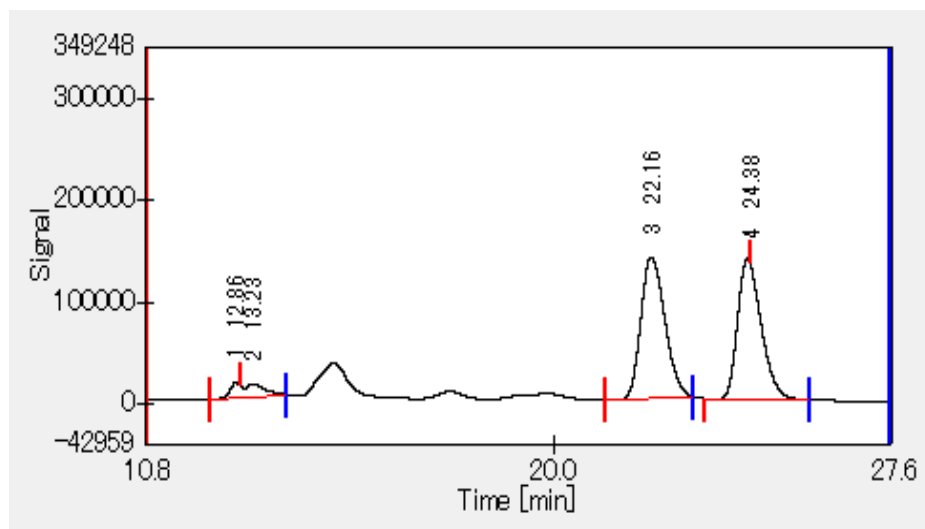

| No | Rt(min) | Area     | Area%   | Height | NTP     | Symmetry | Resolution |
|----|---------|----------|---------|--------|---------|----------|------------|
| 1  | 12.86   | 209456.1 | 2.5024  | 14825  | 18730.2 | *****    | 0.597      |
| 2  | 13.23   | 425709.4 | 5.086   | 12778  | 3568.8  | *****    | 9.487      |
| 3  | 22.16   | 5227444  | 62.4524 | 139703 | 7830.9  | 1.258    | *****      |
| 4  | 24.38   | 2507674  | 29.9592 | 134800 | *****   | *****    | *****      |
|    |         | 8370283  | 100     | 302106 |         |          |            |

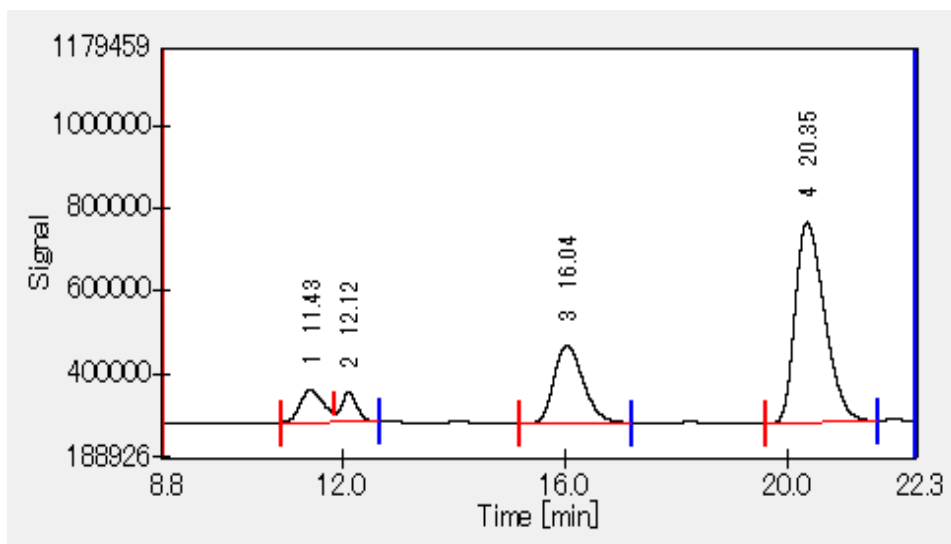

| No | Rt(min) | Area     | Area%   | Height | NTP    | Symmetry | Resolution |
|----|---------|----------|---------|--------|--------|----------|------------|
| 1  | 11.43   | 2224224  | 7.874   | 77191  | 3561.3 | *****    | 1.084      |
| 2  | 12.12   | 1341442  | 4.7489  | 70488  | 9179.4 | *****    | 5.262      |
| 3  | 16.04   | 6958953  | 24.6356 | 188601 | 4274.6 | 1.273    | 4.404      |
| 4  | 20.35   | 17722970 | 62.7415 | 482426 | 6913.4 | 1.366    | *****      |
|    |         | 28247590 | 100     | 818706 |        |          |            |



2-[Hydroxy-(4-chlorophenyl)-methyl]-cyclohexan-1-one (**7d**): AD-H column, *n*-hexane/*iso*-propanol = 90/10, flow rate = 1.0 mL/min,  $\lambda$ =254 nm, 54% ee

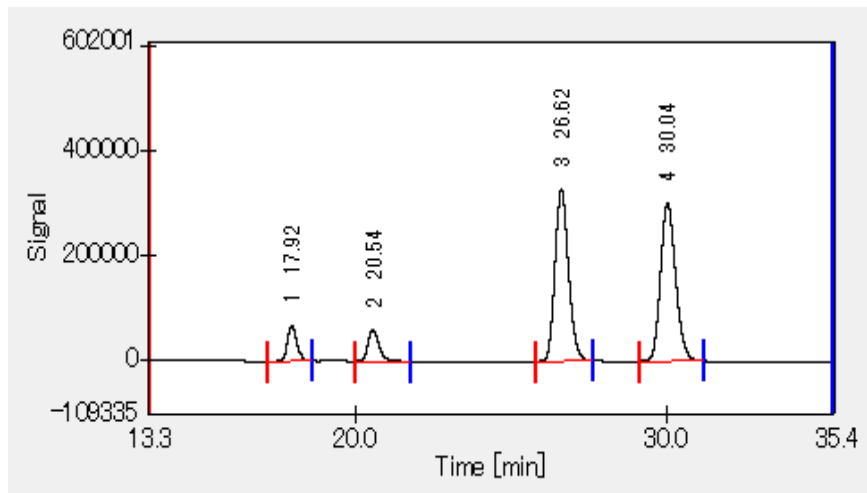

| No | Rt(min) | Area     | Area%   | Height | NTP     | Symmetry | Resolution |
|----|---------|----------|---------|--------|---------|----------|------------|
| 1  | 17.92   | 1427074  | 6.1949  | 68079  | 15406.1 | 1.237    | 4.228      |
| 2  | 20.54   | 1480476  | 6.4267  | 60301  | 15346.9 | 1.201    | 8.222      |
| 3  | 26.62   | 9913909  | 43.0361 | 327524 | 17078.6 | 1.157    | 3.968      |
| 4  | 30.04   | 10214813 | 44.3423 | 302860 | 17405   | 1.17     | *****      |
|    |         | 23036272 | 100     | 758764 |         |          |            |

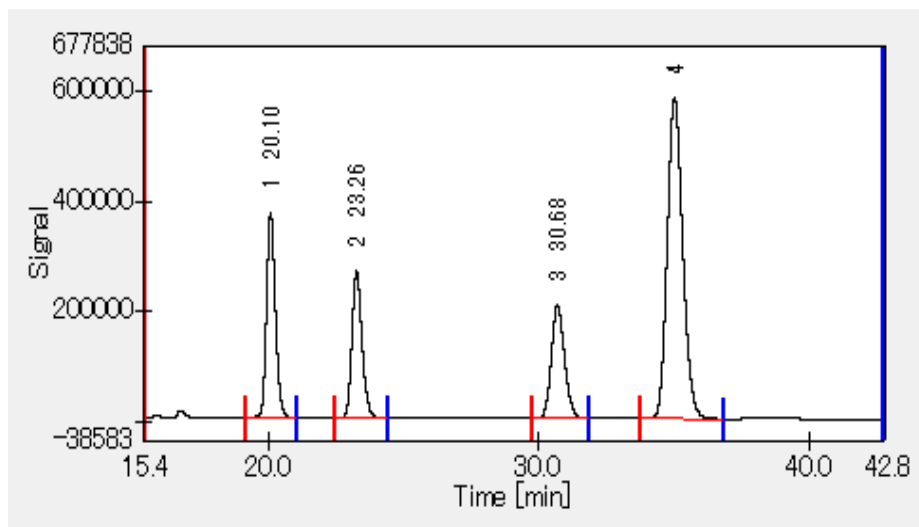

| No | Rt(min) | Area     | Area%   | Height  | NTP     | Symmetry | Resolution |
|----|---------|----------|---------|---------|---------|----------|------------|
| 1  | 20.1    | 8406709  | 18.611  | 372449  | 17380.6 | 1.162    | 4.811      |
| 2  | 23.26   | 6872339  | 15.2142 | 266300  | 17334.5 | 1.206    | 9.137      |
| 3  | 30.68   | 6897315  | 15.2695 | 205260  | 17895.5 | 1.141    | 4.348      |
| 4  | 35      | 22994285 | 50.9054 | 582019  | 17179.3 | 1.164    | *****      |
|    |         | 45170647 | 100     | 1426028 |         |          |            |

2-[Hydroxy-(4-bromophenyl)-methyl]-cyclohexan-1-one (**7e**): AD-H column, *n*-hexane/*iso*-propanol = 90/10, flow rate = 1.0 mL/min,  $\lambda$ =254 nm, 57% ee

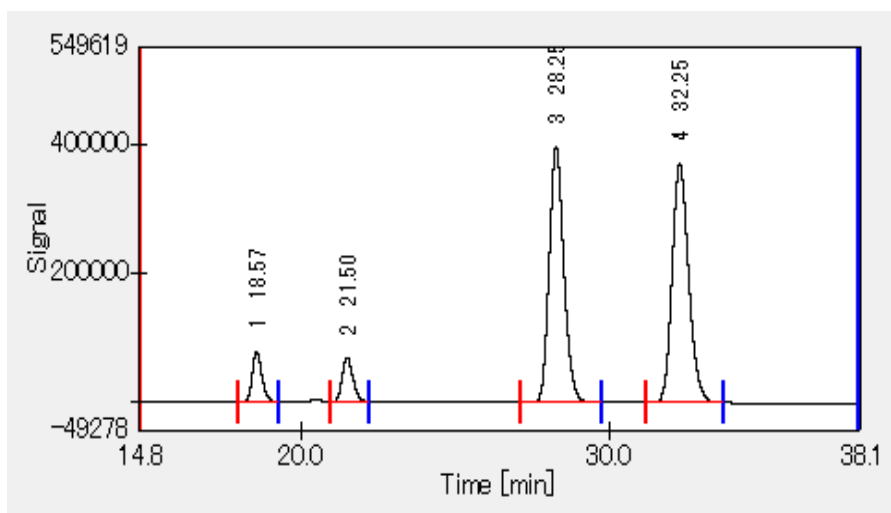

| No | Rt(min) | Area     | Area%   | Height | NTP     | Symmetry | Resolution |
|----|---------|----------|---------|--------|---------|----------|------------|
| 1  | 18.57   | 1738472  | 5.7133  | 80017  | 15708.4 | 1.231    | 4.633      |
| 2  | 21.5    | 1721194  | 5.6565  | 70077  | 16509.3 | 1.214    | 8.668      |
| 3  | 28.25   | 13152200 | 43.2232 | 400422 | 16153.7 | 1.177    | 4.228      |
| 4  | 32.25   | 13816668 | 45.4069 | 372298 | 16541.6 | 1.183    | *****      |
|    |         | 30428534 | 100     | 922814 |         |          |            |

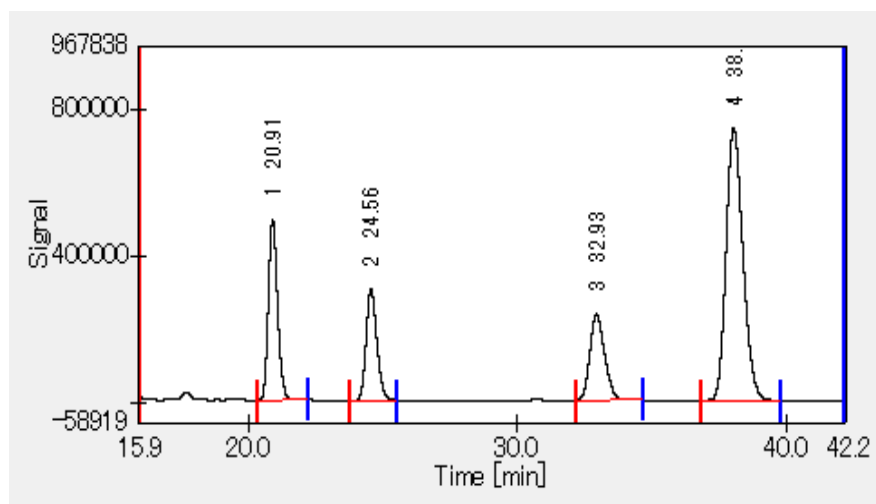

| No | Rt(min) | Area     | Area%   | Height  | NTP     | Symmetry | Resolution |
|----|---------|----------|---------|---------|---------|----------|------------|
| 1  | 20.91   | 11635711 | 19.0473 | 493845  | 17170.3 | 1.192    | 5.276      |
| 2  | 24.56   | 8406015  | 13.7604 | 305910  | 17378.5 | 1.2      | *****      |
| 3  | 32.93   | 8823700  | 14.4441 | 234793  | 16644.3 | 1.177    | 4.643      |
| 4  | 38.01   | 32223206 | 52.7483 | 743538  | 16969.7 | 1.194    | *****      |
|    |         | 61088632 | 100     | 1778086 |         |          |            |

2-[Hydroxy-(4-cyanophenyl)-methyl]-cyclohexan-1-one (**7f**): AD-H column, *n*-hexane/*iso*-propanol = 90/10, flow rate = 1.0 mL/min,  $\lambda$ =254 nm, 65% ee

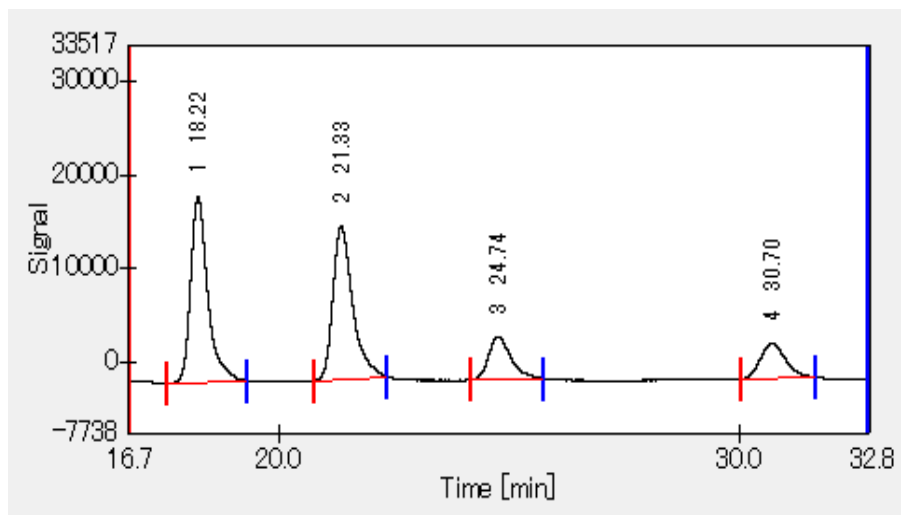

| No | Rt(min) | Area     | Area%   | Height | NTP     | Symmetry | Resolution |
|----|---------|----------|---------|--------|---------|----------|------------|
| 1  | 18.22   | 508061.2 | 39.5133 | 19766  | 10313.7 | 1.489    | 3.999      |
| 2  | 21.33   | 484747.5 | 37.7002 | 16262  | 10329   | 1.499    | 3.836      |
| 3  | 24.74   | 152003.3 | 11.8217 | 4512   | 11125.7 | 1.392    | 6.002      |
| 4  | 30.7    | 140984.4 | 10.9648 | 3687   | 13732.3 | 1.215    | *****      |
|    |         | 1285796  | 100     | 44227  |         |          |            |

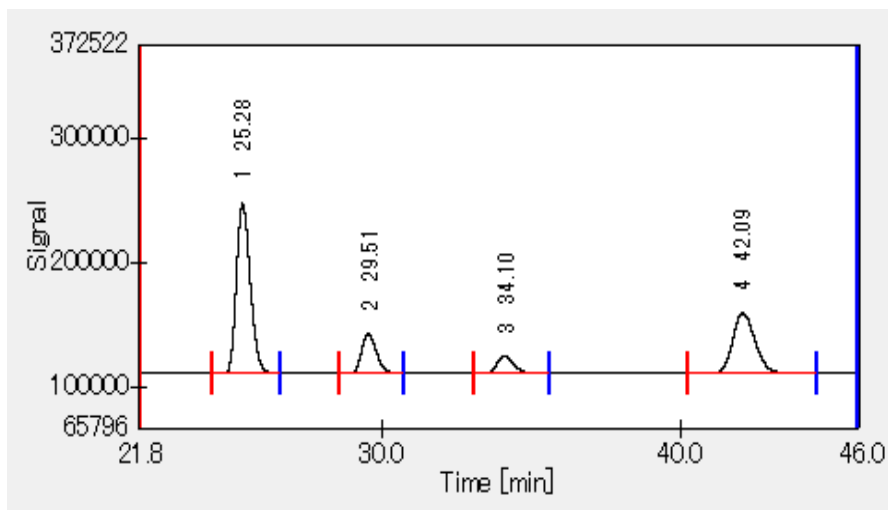

| No | Rt(min) | Area     | Area%   | Height | NTP     | Symmetry | Resolution |
|----|---------|----------|---------|--------|---------|----------|------------|
| 1  | 25.28   | 4392204  | 51.168  | 135856 | 13831.2 | 1.231    | 4.709      |
| 2  | 29.51   | 1111447  | 12.948  | 31940  | 15887.8 | 1.223    | 4.558      |
| 3  | 34.1    | 547062.3 | 6.3731  | 13632  | 16035.4 | 1.173    | 6.457      |
| 4  | 42.09   | 2533183  | 29.5109 | 48441  | 14550.8 | 1.195    | *****      |
|    |         | 8583896  | 100     | 229869 |         |          |            |

2-[Hydroxy-(3-methoxyphenyl)-methyl]-cyclohexan-1-one (**7g**): AD-H column, *n*-hexane/*iso*-propanol = 90/10, flow rate = 1.0 mL/min,  $\lambda$ =254 nm, 29% ee

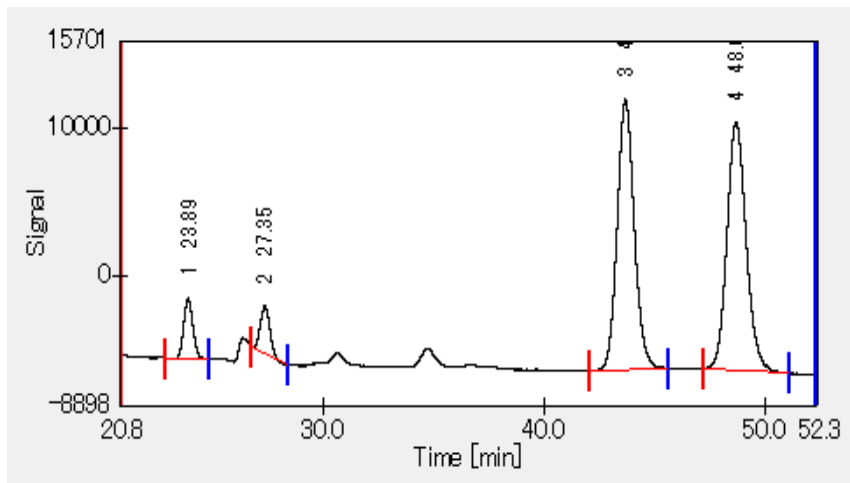

| No | Rt(min) | Area     | Area%   | Height | NTP     | Symmetry | Resolution |
|----|---------|----------|---------|--------|---------|----------|------------|
| 1  | 23.89   | 117216.5 | 5.3369  | 4083   | 15131.4 | 1.137    | 4.406      |
| 2  | 27.35   | 92323.8  | 4.2036  | 3140   | 19058   | 1.104    | 14.512     |
| 3  | 43.66   | 976892.6 | 44.4785 | 18222  | 14397.1 | 1.106    | 3.243      |
| 4  | 48.65   | 1009891  | 45.981  | 16749  | 14330.3 | 1.138    | *****      |
|    |         | 2196324  | 100     | 42194  |         |          |            |

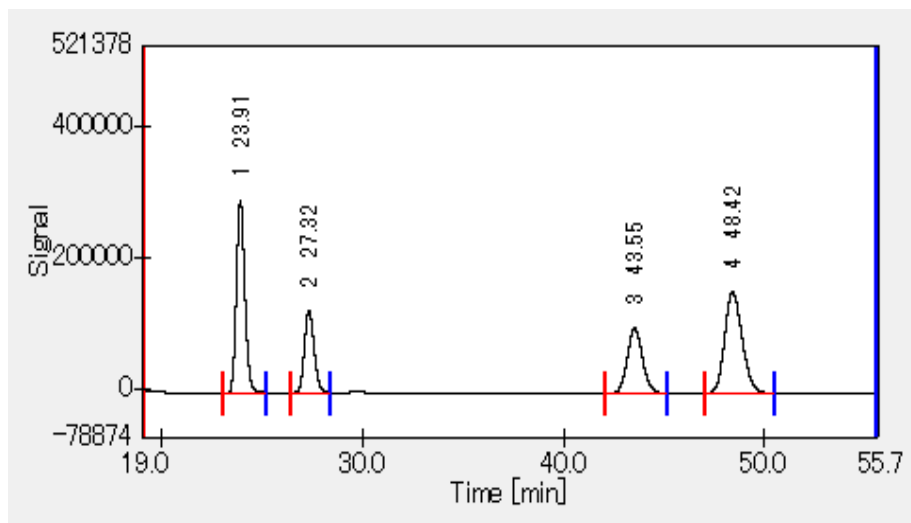

| No | Rt(min) | Area     | Area%   | Height | NTP     | Symmetry | Resolution |
|----|---------|----------|---------|--------|---------|----------|------------|
| 1  | 23.91   | 8614209  | 31.2178 | 295362 | 14872.7 | 1.162    | 4.032      |
| 2  | 27.32   | 4258499  | 15.4327 | 125999 | 14455.3 | 1.174    | 13.977     |
| 3  | 43.55   | 5251424  | 19.0311 | 100274 | 15200   | 1.091    | 3.192      |
| 4  | 48.42   | 9469792  | 34.3184 | 155599 | 13935.1 | 1.199    | *****      |
|    |         | 27593924 | 100     | 677234 |         |          |            |

2-[Hydroxy-(4-methylphenyl)-methyl]-cyclohexan-1-one (**7h**): AS-H column, *n*-hexane/*iso*-propanol = 90/10, flow rate = 1.0 mL/min,  $\lambda=254$  nm, 63% ee

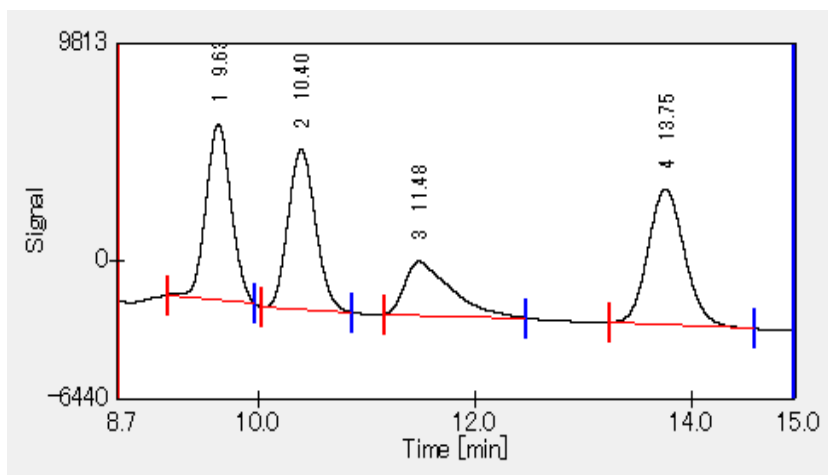

| No | Rt(min) | Area     | Area%   | Height | NTP    | Symmetry | Resolution |
|----|---------|----------|---------|--------|--------|----------|------------|
| 1  | 9.63    | 128755.1 | 29.4393 | 8062   | 8041.6 | 1.095    | 1.716      |
| 2  | 10.4    | 124406.8 | 28.445  | 7247   | 8181.5 | 1.098    | 2.179      |
| 3  | 11.48   | 39635.4  | 9.0625  | 1996   | 7465.3 | 1.197    | 3.931      |
| 4  | 13.75   | 144561.2 | 33.0533 | 6208   | 7739.9 | 1.112    | *****      |
|    |         | 437358.5 | 100     | 23513  |        |          |            |

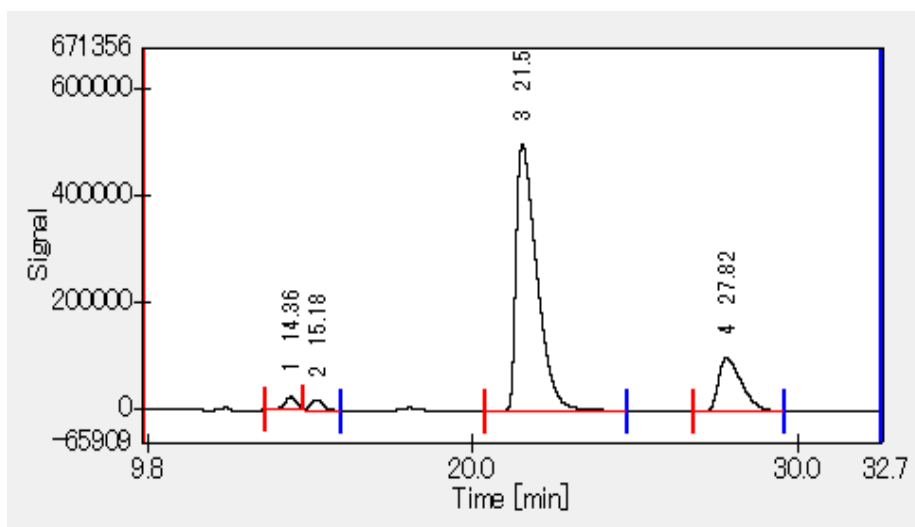

| No | Rt(min) | Area     | Area%   | Height | NTP    | Symmetry | Resolution |
|----|---------|----------|---------|--------|--------|----------|------------|
| 1  | 14.36   | 658185.9 | 2.3275  | 24178  | 6297   | *****    | 1.153      |
| 2  | 15.18   | 522114.3 | 1.8464  | 20038  | 7677.2 | *****    | 6.757      |
| 3  | 21.52   | 22148323 | 78.3231 | 498128 | 5206.2 | 2.093    | 4.968      |
| 4  | 27.82   | 4949514  | 17.503  | 99344  | 6846.8 | 1.628    | *****      |
|    |         | 28278138 | 100     | 641688 |        |          |            |

2-[Hydroxy-(phenyl)-methyl]-cyclohexan-1-one (**7i**): OD-H column, *n*-hexane/*iso*-propanol = 97/3, flow rate = 0.8mL/min,  $\lambda=254$  nm, 87% ee

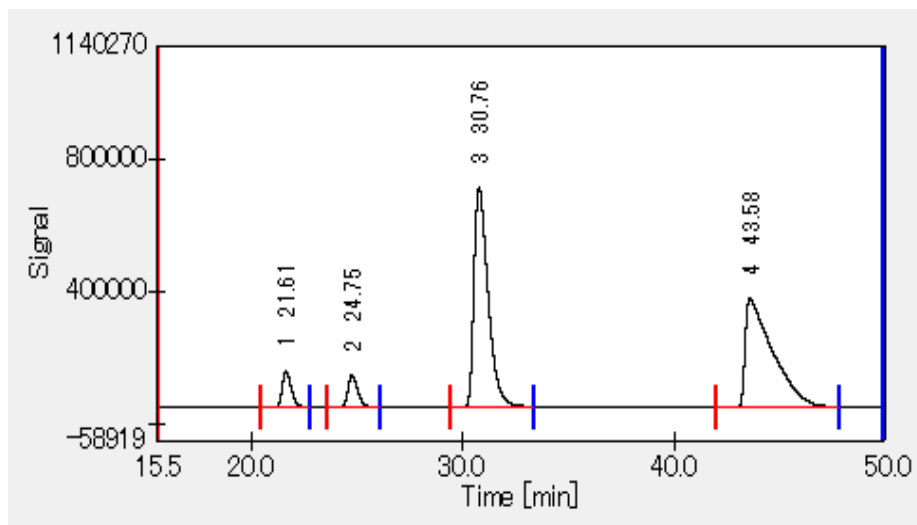

| No | Rt(min) | Area     | Area%   | Height  | NTP     | Symmetry | Resolution |
|----|---------|----------|---------|---------|---------|----------|------------|
| 1  | 21.61   | 3358867  | 4.9644  | 109482  | 11022.9 | 1.358    | 3.644      |
| 2  | 24.75   | 3204930  | 4.7369  | 96711   | 12147.5 | 1.327    | 5.606      |
| 3  | 30.76   | 31051137 | 45.8935 | 668264  | 9735.3  | 1.664    | 6.624      |
| 4  | 43.58   | 30044127 | 44.4052 | 332902  | 4415.1  | 3.916    | *****      |
|    |         | 67659061 | 100     | 1207359 |         |          |            |

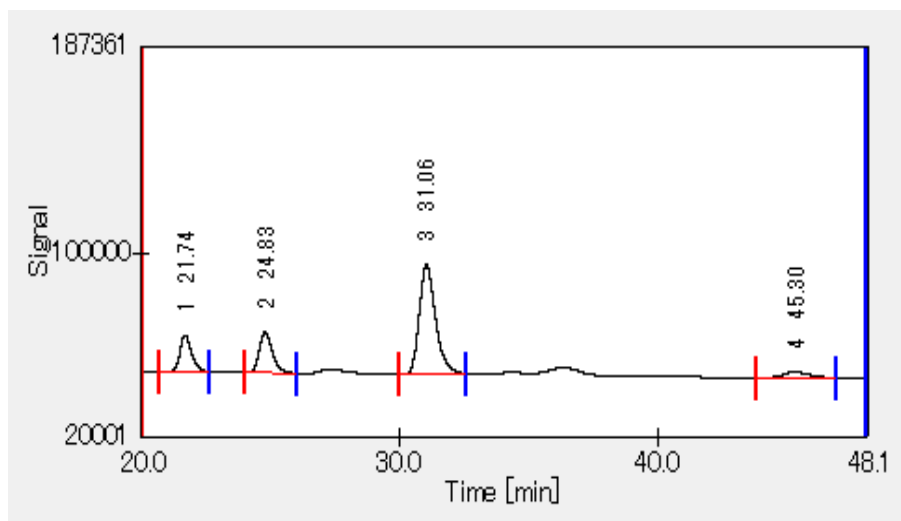

| No | Rt(min) | Area     | Area%   | Height | NTP     | Symmetry | Resolution |
|----|---------|----------|---------|--------|---------|----------|------------|
| 1  | 21.74   | 492189   | 14.8773 | 15896  | 10455   | 1.281    | 3.439      |
| 2  | 24.83   | 598316.3 | 18.0852 | 17391  | 11054.5 | 1.31     | 5.787      |
| 3  | 31.06   | 2069215  | 62.5457 | 46952  | 10527.3 | 1.288    | 10.13      |
| 4  | 45.3    | 148602.2 | 4.4918  | 2528   | 12828   | 1.155    | *****      |
|    |         | 3308323  | 100     | 82767  |         |          |            |

2-[Hydroxy-(naphthyl)-methyl]-cyclohexan-1-one (**7j**): AS-H column, *n*-hexane/*iso*-propanol = 98/2, flow rate = 1.0 mL/min,  $\lambda=254$  nm, 69% ee

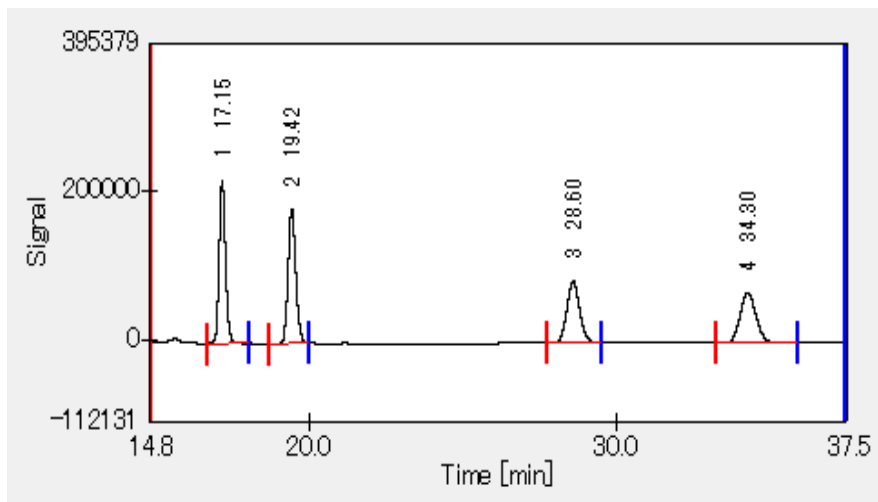

| No | Rt(min) | Area     | Area%   | Height | NTP     | Symmetry | Resolution |
|----|---------|----------|---------|--------|---------|----------|------------|
| 1  | 17.15   | 3111221  | 28.1379 | 217115 | 31437.6 | 1.141    | 5.274      |
| 2  | 19.42   | 3115565  | 28.1772 | 180675 | 26995.9 | 1.139    | 14.681     |
| 3  | 28.6    | 2405972  | 21.7596 | 83236  | 21602.4 | 1.086    | 6.519      |
| 4  | 34.3    | 2424289  | 21.9253 | 67295  | 19989.7 | 1.103    | *****      |
|    |         | 11057047 | 100     | 548321 |         |          |            |

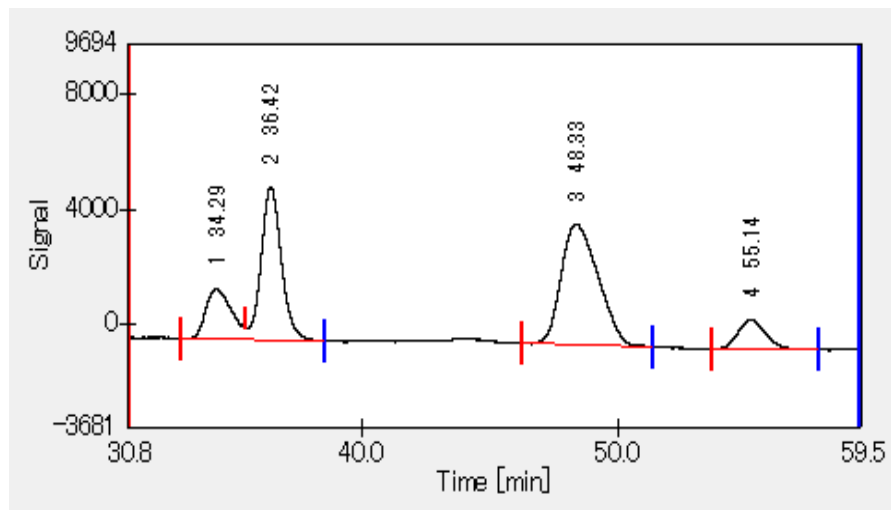

| No | Rt(min) | Area     | Area%   | Height | NTP     | Symmetry | Resolution |
|----|---------|----------|---------|--------|---------|----------|------------|
| 1  | 34.29   | 127028.2 | 13.8648 | 1790   | 5281.1  | *****    | 1.268      |
| 2  | 36.42   | 295663.4 | 32.2708 | 5359   | 9855    | *****    | 5.792      |
| 3  | 48.33   | 417777.2 | 45.5992 | 4199   | 5473.8  | 1.297    | 2.945      |
| 4  | 55.14   | 75725.4  | 8.2652  | 1022   | 11989.3 | 1.168    | *****      |
|    |         | 916194.2 | 100     | 12370  |         |          |            |

2-[Hydroxy-(4-nitrophenyl)-methyl]-cyclopentan-1-one (**7k**): AD-H column, *n*-hexane/*iso*-propanol = 90/10, flow rate = 0.5 mL/min,  $\lambda=265$  nm, 60% ee

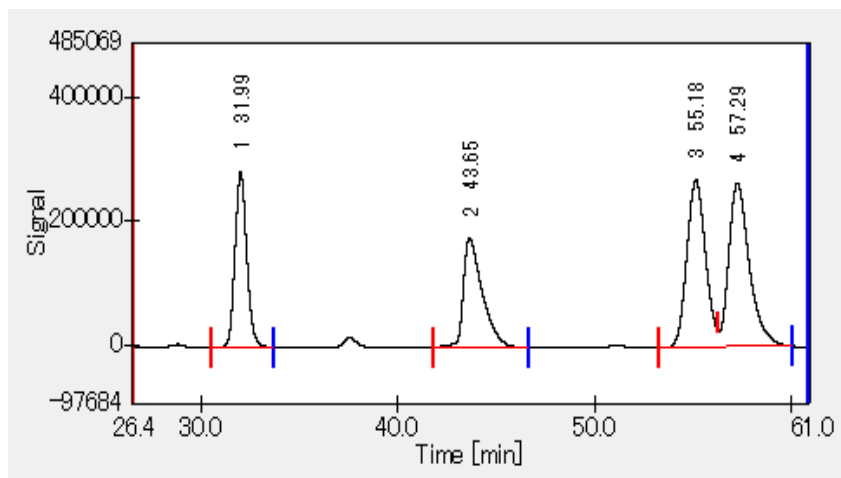

| No | Rt(min) | Area     | Area%   | Height | NTP     | Symmetry | Resolution |
|----|---------|----------|---------|--------|---------|----------|------------|
| 1  | 31.99   | 11669120 | 19.1996 | 282137 | 13232.8 | 1.13     | 7.819      |
| 2  | 43.65   | 11844749 | 19.4886 | 176378 | 8700.9  | 1.855    | 6.235      |
| 3  | 55.18   | 17853665 | 29.3753 | 269628 | 15708   | *****    | 1.136      |
| 4  | 57.29   | 19410305 | 31.9365 | 264079 | 13741.8 | *****    | *****      |
|    |         | 60777840 | 100     | 992222 |         |          |            |

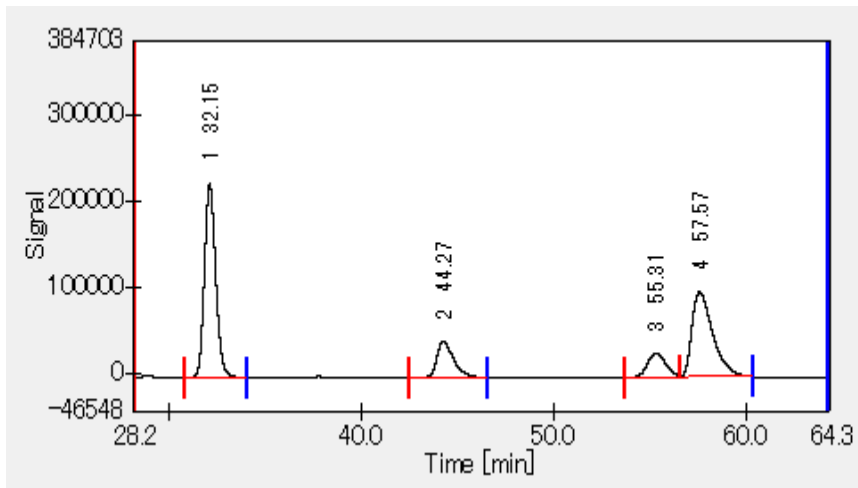

| No | Rt(min) | Area     | Area%   | Height | NTP     | Symmetry | Resolution |
|----|---------|----------|---------|--------|---------|----------|------------|
| 1  | 32.15   | 9092081  | 43.5549 | 224853 | 14034.8 | 1.167    | 8.916      |
| 2  | 44.27   | 2454550  | 11.7583 | 41166  | 11779.7 | 1.497    | 6.478      |
| 3  | 55.31   | 1856040  | 8.8912  | 28279  | 16061.7 | *****    | 1.205      |
| 4  | 57.57   | 7472323  | 35.7956 | 99083  | 13179.9 | 1.693    | *****      |
|    |         | 20874994 | 100     | 393381 |         |          |            |



2-[Hydroxy-(3-nitrophenyl)-methyl]-cyclopentan-1-one (**71**): AD-H column, *n*-hexane/*iso*-propanol = 95/5, flow rate = 1.0 mL/min,  $\lambda$ =269 nm, 73% ee

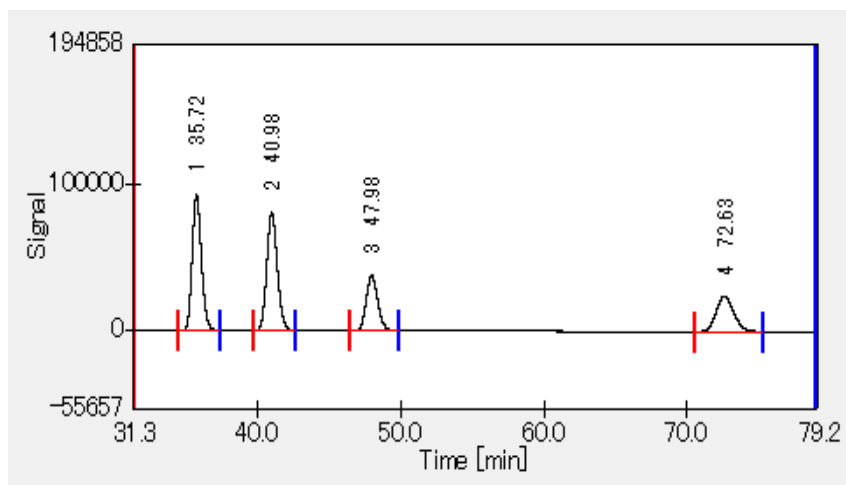

| No | Rt(min) | Area     | Area%   | Height | NTP     | Symmetry | Resolution |
|----|---------|----------|---------|--------|---------|----------|------------|
| 1  | 35.72   | 4227655  | 33.3948 | 93431  | 13657.3 | 1.167    | 4.039      |
| 2  | 40.98   | 4180548  | 33.0227 | 81112  | 14002.1 | 1.117    | 4.798      |
| 3  | 47.98   | 2146403  | 16.9547 | 38023  | 15735.6 | 1.119    | 12.757     |
| 4  | 72.63   | 2105033  | 16.6279 | 24382  | 15471.1 | 1.13     | *****      |
|    |         | 12659639 | 100     | 236948 |         |          |            |

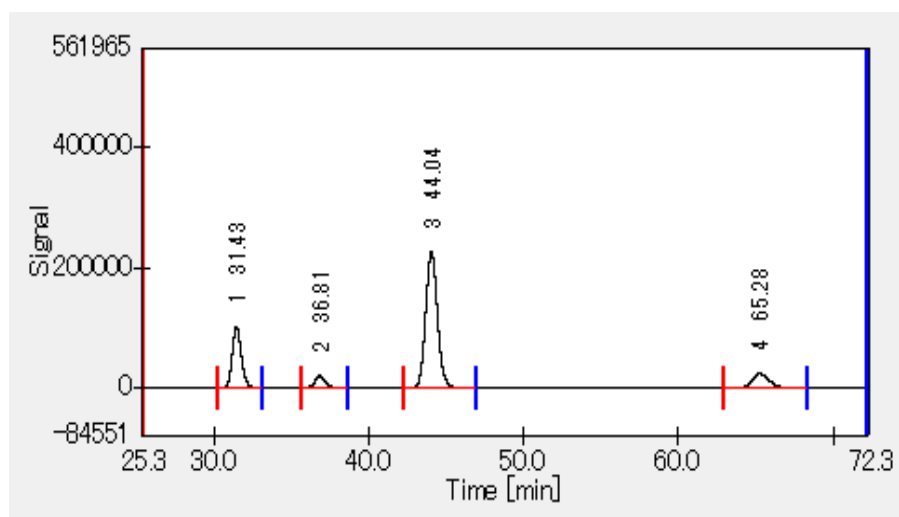

| No | Rt(min) | Area     | Area%   | Height | NTP     | Symmetry | Resolution |
|----|---------|----------|---------|--------|---------|----------|------------|
| 1  | 31.43   | 4156267  | 21.712  | 101429 | 13012.3 | 1.202    | 4.546      |
| 2  | 36.81   | 954999.1 | 4.9888  | 20486  | 13584.4 | 1.142    | 5.376      |
| 3  | 44.04   | 12130349 | 63.3679 | 228867 | 15242   | 1.088    | 11.906     |
| 4  | 65.28   | 1901118  | 9.9313  | 23962  | 14870.4 | 1.171    | *****      |
|    |         | 19142734 | 100     | 374744 |         |          |            |

2-[Hydroxy-(4-nitrophenyl)-methyl]-cycloheptan-1-one(**7m**): AD-H column, *n*-hexane/iso-propanol = 90/10, flow rate = 1.0 mL/min,  $\lambda=254$  nm, 14% ee

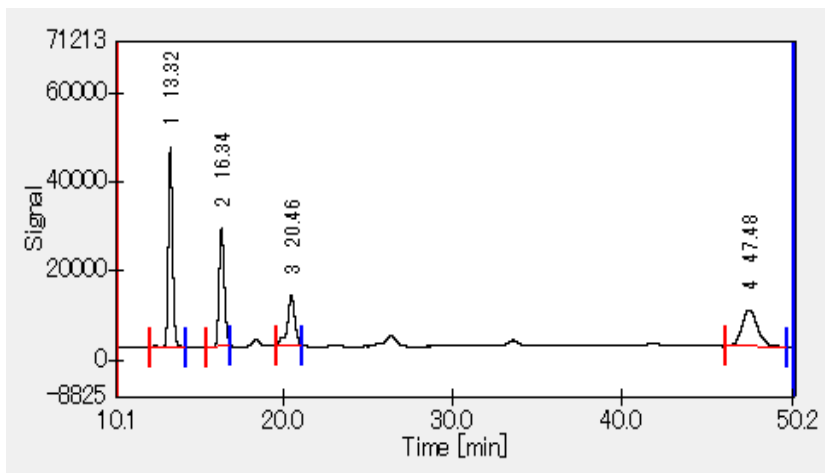

| No | Rt(min) | Area     | Area%   | Height | NTP     | Symmetry | Resolution |
|----|---------|----------|---------|--------|---------|----------|------------|
| 1  | 13.32   | 786752.4 | 35.5983 | 44893  | 13010   | 1.161    | 5.822      |
| 2  | 16.34   | 558078.5 | 25.2515 | 26504  | 13120.1 | 1.167    | 5.255      |
| 3  | 20.46   | 339727.3 | 15.3717 | 11406  | 6700.9  | 0.824    | 19.862     |
| 4  | 47.48   | 525524.6 | 23.7785 | 8224   | 12184.7 | 1.161    | *****      |
|    |         | 2210083  | 100     | 91027  |         |          |            |

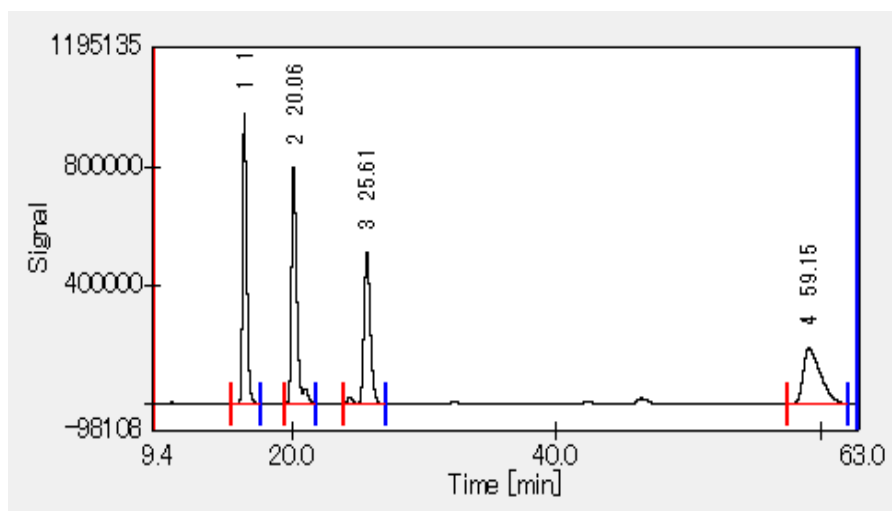

| No | Rt(min) | Area     | Area%   | Height  | NTP     | Symmetry | Resolution |
|----|---------|----------|---------|---------|---------|----------|------------|
| 1  | 16.32   | 21194419 | 26.853  | 982267  | 12752   | 1.311    | 5.724      |
| 2  | 20.06   | 22732271 | 28.8014 | 799711  | 12159.4 | 1.418    | 6.818      |
| 3  | 25.61   | 17728896 | 22.4622 | 510098  | 12886.2 | 1.204    | 19.732     |
| 4  | 59.15   | 17272030 | 21.8834 | 191068  | 8979.3  | 1.723    | *****      |
|    |         | 78927616 | 100     | 2483144 |         |          |            |

2-[Hydroxy-(4-nitrophenyl)-methyl]-4-methylcyclohexan-1-one(**7n**): AD-H column, n-hexane/iso-propanol = 90/10, flow rate = 1.0 mL/min,  $\lambda=254$  nm, 58% ee

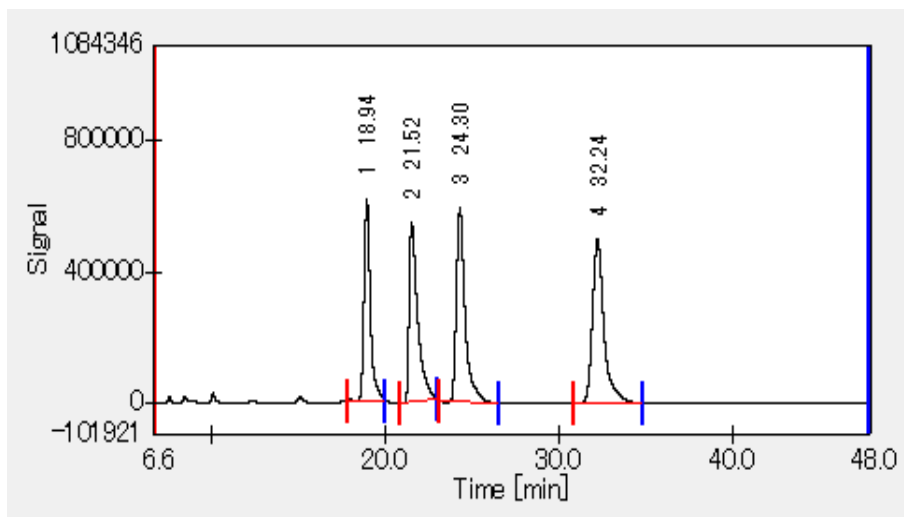

| No | Rt(min) | Area     | Area%   | Height  | NTP     | Symmetry | Resolution |
|----|---------|----------|---------|---------|---------|----------|------------|
| 1  | 18.94   | 15406185 | 19.7134 | 613926  | 11992.6 | 1.467    | 3.054      |
| 2  | 21.52   | 18723599 | 23.9583 | 547440  | 7404.6  | 2.403    | 2.811      |
| 3  | 24.3    | 20687513 | 26.4713 | 591091  | 9880.7  | 1.712    | 6.996      |
| 4  | 32.24   | 23333454 | 29.857  | 499508  | 9973.7  | 1.539    | *****      |
|    |         | 78150751 | 100     | 2251965 |         |          |            |

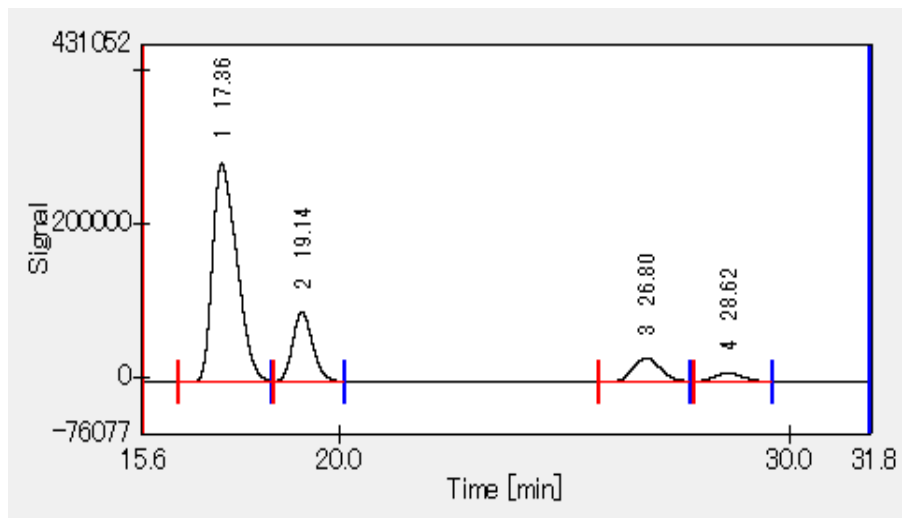

| No | Rt(min) | Area     | Area%   | Height | NTP    | Symmetry | Resolution |
|----|---------|----------|---------|--------|--------|----------|------------|
| 1  | 17.36   | 10667100 | 69.8405 | 284295 | 4869.3 | 1.42     | 1.95       |
| 2  | 19.14   | 2801843  | 18.3445 | 90374  | 8363.9 | 1.187    | 7.659      |
| 3  | 26.8    | 1344215  | 8.801   | 30967  | 8498.4 | 1.086    | 1.565      |
| 4  | 28.62   | 460348.8 | 3.014   | 10530  | 9700.1 | 1.098    | *****      |
|    |         | 15273507 | 100     | 416166 |        |          |            |

2-[Hydroxy-(4-nitrophenyl)-methyl]-dihydro-2H-pyran-4-one (**7o**): AD-H column, *n*-hexane/*iso*-propanol = 90/10, flow rate = 1.0 mL/min,  $\lambda=254$  nm, 43% ee

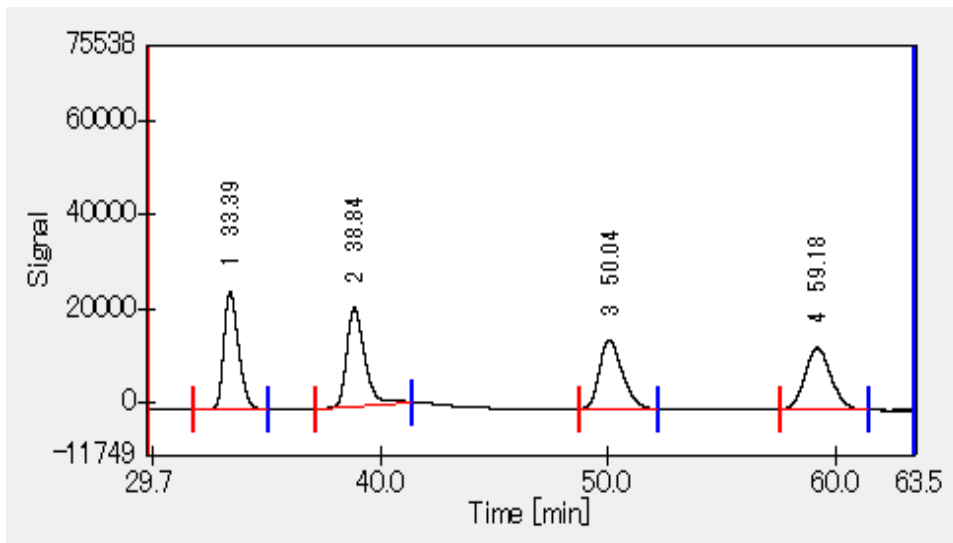

| No | Rt(min) | Area    | Area%   | Height | NTP     | Symmetry | Resolution |
|----|---------|---------|---------|--------|---------|----------|------------|
| 1  | 33.39   | 1129277 | 26.0882 | 25069  | 12015.4 | 1.323    | 4.117      |
| 2  | 38.84   | 1125845 | 26.0089 | 20874  | 11798.3 | 1.349    | 6.79       |
| 3  | 50.04   | 1021881 | 23.6071 | 14801  | 11476.3 | 1.285    | 4.522      |
| 4  | 59.18   | 1051692 | 24.2958 | 13129  | 11891.8 | 1.133    | *****      |
|    |         | 4328696 | 100     | 73873  |         |          |            |

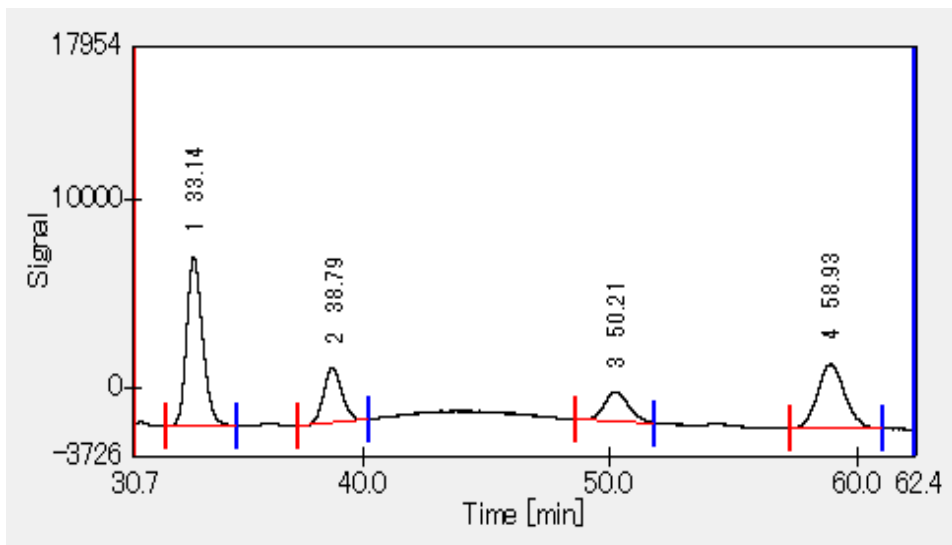

| No | Rt(min) | Area     | Area%   | Height | NTP     | Symmetry | Resolution |
|----|---------|----------|---------|--------|---------|----------|------------|
| 1  | 33.14   | 401302.2 | 43.9729 | 8940   | 12015.9 | 1.243    | 4.334      |
| 2  | 38.79   | 147973.6 | 16.2143 | 2880   | 12342.2 | 1.086    | 7.03       |
| 3  | 50.21   | 104768.5 | 11.4801 | 1536   | 11745.1 | 1.126    | 4.436      |
| 4  | 58.93   | 258567.4 | 28.3327 | 3390   | 12847.9 | 1.092    | *****      |

912611.7 100 16746

3-Hydroxy-3-(4-nitrophenyl)-1-phenylpropan-1-one (**7p**): AD-H column, *n*-hexane/iso-propanol = 90/10, flow rate = 1.0 mL/min,  $\lambda=254$  nm, 94% ee

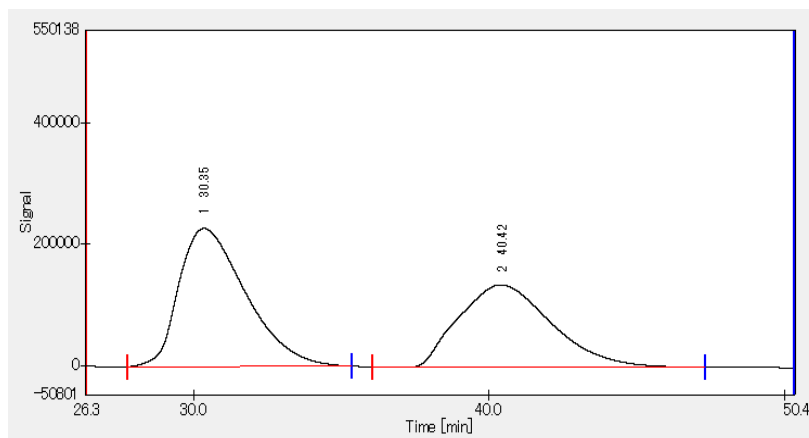

| No | Rt(min) | Area     | Area%   | Height | NTP   | Symmetry | Resolution |
|----|---------|----------|---------|--------|-------|----------|------------|
| 1  | 30.35   | 35834005 | 54.9044 | 227552 | 832.2 | 1.498    | 2.012      |
| 2  | 40.42   | 29432132 | 45.0956 | 135561 | 776.4 | 1.311    | *****      |
|    |         | 65266137 | 100     | 363113 |       |          |            |

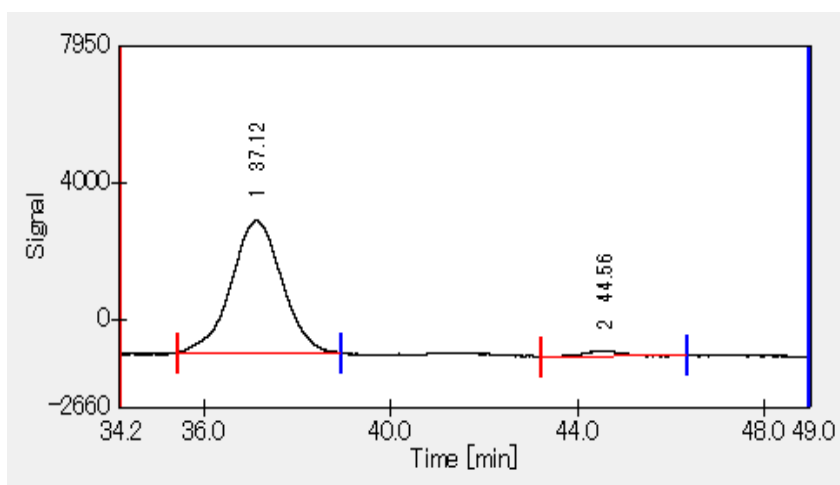

| No | Rt(min) | Area     | Area%   | Height | NTP     | Symmetry | Resolution |
|----|---------|----------|---------|--------|---------|----------|------------|
| 1  | 37.12   | 293439   | 97.0904 | 3873   | 5178.9  | 0.991    | 4.288      |
| 2  | 44.56   | 8793.8   | 2.9096  | 164    | 15982.2 | 1.022    | *****      |
|    |         | 302232.8 | 100     | 4037   |         |          |            |

3-Hydroxy-3-(4-nitrophenyl)-1-propylpropan-1-one (**7q**): AS-H column, *n*-hexane/*iso*-propanol = 70/30, flow rate = 0.6 mL/min,  $\lambda=254$  nm.

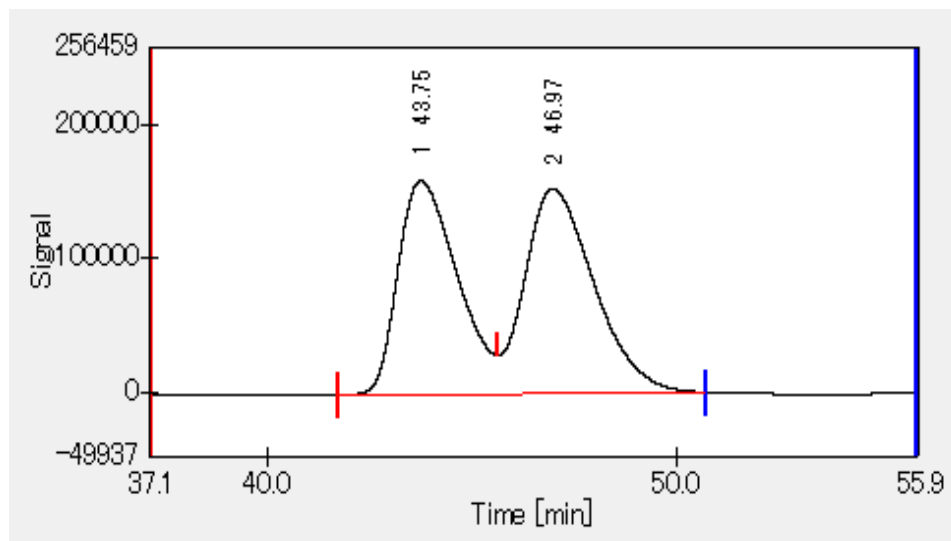

| No | Rt(min) | Area     | Area%   | Height | NTP    | Symmetry | Resolution |
|----|---------|----------|---------|--------|--------|----------|------------|
| 1  | 43.75   | 16132516 | 47.1717 | 159998 | 4257.9 | *****    | 1.109      |
| 2  | 46.97   | 18067061 | 52.8283 | 153055 | 3581.8 | *****    | *****      |
|    |         | 34199577 | 100     | 313053 |        |          |            |

3-Hydroxy-3-(4-nitrophenyl)-2,3-dimethylpropan-1-one (**7r**): AS-H column, *n*-hexane/*iso*-propanol = 90/10, flow rate = 1.0 mL/min,  $\lambda=254$  nm

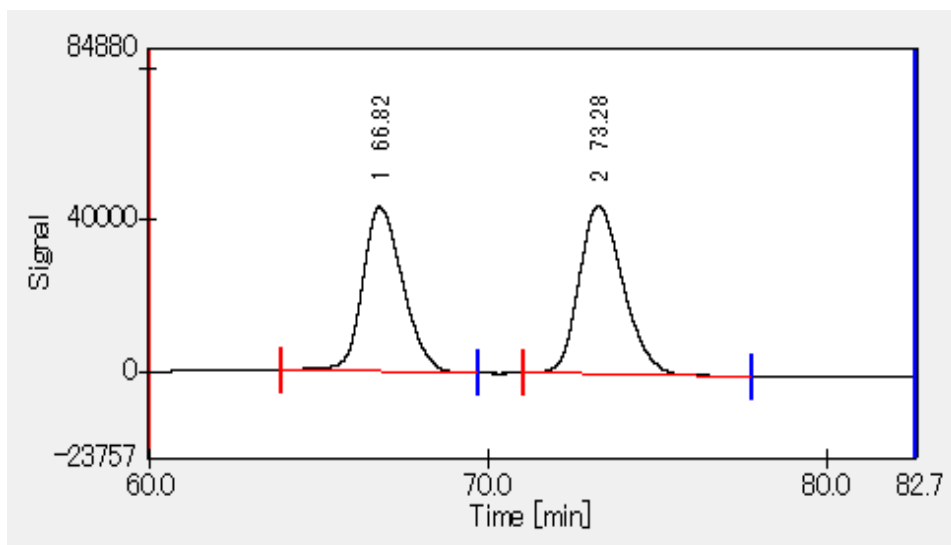

| No | Rt(min) | Area    | Area%   | Height | NTP     | Symmetry | Resolution |
|----|---------|---------|---------|--------|---------|----------|------------|
| 1  | 66.82   | 3590435 | 47.1853 | 43595  | 14871.6 | 1.209    | 2.792      |
| 2  | 73.28   | 4018792 | 52.8147 | 44329  | 14505.8 | 1.221    | *****      |
|    |         | 7609227 | 100     | 87924  |         |          |            |

## 6. Theoretical Calculations

The DFT method (at the B3LYP/6-31G(d) level of theory) was used to perform the conformational analysis with Gaussian 16 program package. The Gas phase geometry optimizations were performed using the B3LYP hybrid density functional and the 6-31G(d) basis set as implemented in the Gaussian 16. Vibrational mode analysis was performed for all structures to ensure that they have zero imaginary frequency.

1) Gaussian 16, Revision A.03,

M. J. Frisch, G. W. Trucks, H. B. Schlegel, G. E. Scuseria, M. A. Robb, J. R. Cheeseman, G. Scalmani, V. Barone, G. A. Petersson, H. Nakatsuji, X. Li, M. Caricato, A. V. Marenich, J. Bloino, B. G. Janesko, R. Gomperts, B. Mennucci, H. P. Hratchian, J. V. Ortiz, A. F. Izmaylov, J. L. Sonnenberg, D. Williams-Young, F. Ding, F. Lipparini, F. Egidi, J. Goings, B. Peng, A. Petrone, T. Henderson, D. Ranasinghe, V. G. Zakrzewski, J. Gao, N. Rega, G. Zheng, W. Liang, M. Hada, M. Ehara, K. Toyota, R. Fukuda, J. Hasegawa, M. Ishida, T. Nakajima, Y. Honda, O. Kitao, H. Nakai, T. Vreven, K. Throssell, J. A. Montgomery, Jr., J. E. Peralta, F. Ogliaro, M. J. Bearpark, J. J. Heyd, E. N. Brothers, K. N. Kudin, V. N. Staroverov, T. A. Keith, R. Kobayashi, J. Normand, K. Raghavachari, A. P. Rendell, J. C. Burant, S. S. Iyengar, J. Tomasi, M. Cossi, J. M. Millam, M. Klene, C. Adamo, R. Cammi, J. W. Ochterski, R. L. Martin, K. Morokuma, O. Farkas, J. B. Foresman, and D. J. Fox, Gaussian, Inc., Wallingford CT, 2016.

**Table S1.** Cartesian coordinates (Angstroms) for I-1 in gas phase.

Point Group: C1

Imaginary Freq: 0

Total energy = -1451.8108 hartree

| Symbol | X        | Y        | Z        |
|--------|----------|----------|----------|
| C      | -1.6391  | 2.398025 | -0.6255  |
| C      | -0.34922 | 2.964355 | -0.43233 |
| C      | -0.14475 | 4.297524 | -0.83399 |
| C      | -1.15548 | 5.062136 | -1.40685 |
| C      | -2.41269 | 4.48404  | -1.58879 |
| C      | -2.662   | 3.168441 | -1.20627 |
| H      | 0.840728 | 4.730491 | -0.68639 |
| H      | -0.96824 | 6.089158 | -1.70763 |
| H      | -3.21835 | 5.06114  | -2.03629 |
| H      | -3.63564 | 2.723825 | -1.35198 |
| B      | 0.866687 | 2.221639 | 0.182829 |
| O      | 0.856929 | 0.908032 | 0.589817 |



|   |          |          |          |
|---|----------|----------|----------|
| O | 2.090839 | 2.82013  | 0.357701 |
| C | 2.163409 | 0.552592 | 1.125952 |
| C | 3.020069 | 1.861102 | 0.898201 |
| H | 3.354585 | 2.255949 | 1.863968 |
| C | 1.932908 | 0.220714 | 2.600973 |
| H | 1.219148 | -0.60582 | 2.68319  |
| H | 2.853889 | -0.0705  | 3.110332 |
| H | 1.509858 | 1.087628 | 3.120604 |
| C | 2.708244 | -0.62398 | 0.302201 |
| H | 2.082501 | -1.5109  | 0.45238  |
| C | 4.241131 | 1.707032 | -0.05513 |
| H | 4.126448 | 2.454966 | -0.84742 |
| H | 5.163268 | 1.957795 | 0.482479 |
| C | 4.353455 | 0.306862 | -0.67606 |
| H | 5.191974 | 0.256439 | -1.38129 |
| C | 2.95093  | -0.14283 | -1.15554 |
| H | 2.980045 | -0.96717 | -1.87051 |
| H | 2.282097 | 0.62653  | -1.55078 |
| C | 4.273674 | -0.80589 | 0.424279 |
| C | 4.70289  | -2.18501 | -0.10682 |
| H | 5.789056 | -2.21458 | -0.25958 |
| H | 4.449053 | -2.9699  | 0.616619 |
| H | 4.228661 | -2.44837 | -1.05638 |
| C | 5.018027 | -0.57159 | 1.744245 |
| H | 4.767694 | -1.34433 | 2.481661 |
| H | 6.100387 | -0.6306  | 1.570834 |
| H | 4.820837 | 0.400956 | 2.202587 |
| N | -1.86647 | 1.067949 | -0.21451 |
| H | -1.07226 | 0.558628 | 0.172652 |
| C | -3.0144  | 0.32479  | -0.31042 |
| O | -4.06365 | 0.69364  | -0.83021 |
| C | -2.92737 | -1.08145 | 0.333842 |
| H | -3.51567 | -1.72443 | -0.33211 |
| C | -3.64621 | -1.1325  | 1.734625 |
| C | -2.95318 | -0.20931 | 2.758131 |

|   |          |          |          |
|---|----------|----------|----------|
| H | -3.00193 | 0.840016 | 2.449352 |
| H | -3.44789 | -0.29426 | 3.732644 |
| H | -1.89602 | -0.46084 | 2.90786  |
| C | -3.63135 | -2.58878 | 2.251108 |
| H | -4.20764 | -2.65813 | 3.180748 |
| H | -4.08658 | -3.27    | 1.522657 |
| H | -2.6244  | -2.96201 | 2.469279 |
| C | -5.12176 | -0.70483 | 1.593677 |
| H | -5.62265 | -0.8021  | 2.564494 |
| H | -5.22201 | 0.327114 | 1.253156 |
| H | -5.65167 | -1.33983 | 0.874808 |
| N | -1.54128 | -1.56097 | 0.423518 |
| H | -1.29551 | -1.86196 | 1.358632 |
| C | -1.01229 | -2.44109 | -0.5475  |
| C | -0.22146 | -3.4757  | -0.20374 |
| C | -1.31925 | -2.10597 | -1.99335 |
| C | 0.453765 | -4.39305 | -1.1937  |
| H | -0.03729 | -3.67006 | 0.854257 |
| C | -0.35105 | -2.79319 | -2.96812 |
| H | -2.35203 | -2.40147 | -2.23186 |
| H | -1.27922 | -1.01865 | -2.1297  |
| C | -0.14916 | -4.26682 | -2.60029 |
| H | 0.3759   | -5.43307 | -0.84672 |
| H | 1.53545  | -4.18033 | -1.23622 |
| H | -0.72844 | -2.69414 | -3.99297 |
| H | 0.618626 | -2.27669 | -2.93657 |
| H | 0.494562 | -4.76486 | -3.33582 |
| H | -1.1202  | -4.78078 | -2.62761 |

**Table S2.** Cartesian coordinates (Angstroms) for I-2 in gas phase.

Point Group: C1

Imaginary Freq: 0

Total energy = -1451.8010 hartree

| Symbol | X        | Y        | Z        |
|--------|----------|----------|----------|
| C      | 0.855865 | 2.24676  | 0.822282 |
| C      | -0.49461 | 2.431446 | 0.458758 |

|   |          |          |          |
|---|----------|----------|----------|
| C | -0.90956 | 3.758068 | 0.224152 |
| C | -0.069   | 4.856253 | 0.387647 |
| C | 1.250408 | 4.646836 | 0.788618 |
| C | 1.708558 | 3.350335 | 0.992273 |
| H | -1.93716 | 3.920128 | -0.08737 |
| H | -0.43884 | 5.861756 | 0.207345 |
| H | 1.92741  | 5.485316 | 0.929502 |
| H | 2.74567  | 3.181274 | 1.275473 |
| B | -1.63858 | 1.362443 | 0.355989 |
| O | -2.6054  | 1.509058 | -0.61069 |
| O | -1.9745  | 0.432226 | 1.313743 |
| C | -3.75681 | 0.701434 | -0.2569  |
| C | -3.23621 | -0.16782 | 0.949088 |
| H | -3.89684 | -0.03284 | 1.812063 |
| C | -4.85716 | 1.687013 | 0.146721 |
| H | -5.0484  | 2.380201 | -0.67929 |
| H | -5.79345 | 1.181318 | 0.396257 |
| H | -4.54033 | 2.273827 | 1.0167   |
| C | -4.13905 | -0.16613 | -1.46581 |
| H | -4.53654 | 0.464374 | -2.27038 |
| C | -3.08187 | -1.68743 | 0.647239 |
| H | -2.02021 | -1.93306 | 0.723137 |
| H | -3.60449 | -2.26773 | 1.417984 |
| C | -3.57939 | -2.08504 | -0.75261 |
| H | -3.47253 | -3.1658  | -0.91032 |
| C | -2.95519 | -1.11766 | -1.78959 |
| H | -2.99112 | -1.49941 | -2.8121  |
| H | -1.94732 | -0.75049 | -1.58852 |
| C | -4.9742  | -1.44912 | -1.07392 |
| C | -5.62777 | -2.07473 | -2.31899 |
| H | -5.98816 | -3.08668 | -2.09407 |
| H | -6.49294 | -1.47956 | -2.63806 |
| H | -4.94733 | -2.14855 | -3.17167 |
| C | -6.03629 | -1.42368 | 0.032466 |
| H | -6.90858 | -0.83052 | -0.27008 |

|   |          |          |          |
|---|----------|----------|----------|
| H | -6.39243 | -2.44465 | 0.223129 |
| H | -5.68008 | -1.02602 | 0.985849 |
| N | 1.451966 | 0.981111 | 1.026965 |
| H | 2.403756 | 0.998669 | 1.385835 |
| C | 1.179893 | -0.19619 | 0.386624 |
| O | 0.205734 | -0.40156 | -0.33015 |
| C | 2.236    | -1.29712 | 0.647498 |
| H | 2.135906 | -1.97378 | -0.21148 |
| C | 1.930634 | -2.15739 | 1.928843 |
| C | 2.172283 | -1.37351 | 3.235849 |
| H | 1.526869 | -0.49204 | 3.298812 |
| H | 1.944884 | -2.01522 | 4.094906 |
| H | 3.211048 | -1.04145 | 3.347846 |
| C | 2.831569 | -3.41203 | 1.902769 |
| H | 2.612884 | -4.04802 | 2.768099 |
| H | 2.65585  | -4.00431 | 0.997187 |
| H | 3.901312 | -3.17394 | 1.941135 |
| C | 0.461422 | -2.618   | 1.900499 |
| H | 0.278412 | -3.32046 | 2.7222   |
| H | -0.22654 | -1.77647 | 2.01584  |
| H | 0.219222 | -3.12529 | 0.960082 |
| N | 3.590429 | -0.71363 | 0.715897 |
| H | 4.152727 | -1.18712 | 1.415006 |
| C | 4.341143 | -0.57549 | -0.4855  |
| C | 5.625384 | -0.96679 | -0.55162 |
| C | 3.637485 | 0.100501 | -1.64452 |
| C | 6.505532 | -0.78116 | -1.76251 |
| H | 6.07936  | -1.44002 | 0.320657 |
| C | 4.618895 | 0.581154 | -2.72579 |
| H | 2.902006 | -0.58828 | -2.08601 |
| H | 3.05654  | 0.952813 | -1.27189 |
| C | 5.68545  | -0.47736 | -3.02427 |
| H | 7.112423 | -1.68404 | -1.91743 |
| H | 7.22931  | 0.031849 | -1.58606 |
| H | 4.063373 | 0.844328 | -3.63361 |

|   |          |          |          |
|---|----------|----------|----------|
| H | 5.113096 | 1.499937 | -2.38068 |
| H | 6.344619 | -0.14327 | -3.83481 |
| H | 5.19555  | -1.39816 | -3.37029 |

**Table S3.** Cartesian coordinates (Angstroms) for I-A in gas phase.

Point Group: C1

Imaginary Freq: 0

Total energy = -1872.6596 hartree

| Symbol | X        | Y        | Z        |
|--------|----------|----------|----------|
| C      | -0.88121 | -2.4083  | 0.617541 |
| C      | -2.24912 | -2.63383 | 0.928211 |
| C      | -2.61503 | -3.90409 | 1.40783  |
| C      | -1.68285 | -4.92251 | 1.582031 |
| C      | -0.34506 | -4.67383 | 1.271949 |
| C      | 0.063569 | -3.43071 | 0.792977 |
| H      | -3.65971 | -4.08152 | 1.647522 |
| H      | -1.99221 | -5.89465 | 1.955132 |
| H      | 0.398817 | -5.45566 | 1.402825 |
| H      | 1.100536 | -3.24081 | 0.557609 |
| B      | -3.37136 | -1.56833 | 0.787131 |
| O      | -3.17144 | -0.28312 | 0.325356 |
| O      | -4.68018 | -1.81431 | 1.108992 |
| C      | -4.42678 | 0.46149  | 0.399013 |
| C      | -5.47075 | -0.63891 | 0.839691 |
| H      | -5.93002 | -0.34778 | 1.790081 |
| C      | -4.20569 | 1.550357 | 1.449182 |
| H      | -3.36006 | 2.181214 | 1.155884 |
| H      | -5.08373 | 2.188431 | 1.570641 |
| H      | -3.97035 | 1.09872  | 2.419225 |
| C      | -4.74063 | 1.005385 | -1.00207 |
| H      | -4.00431 | 1.767433 | -1.28414 |
| C      | -6.58079 | -0.96629 | -0.20128 |
| H      | -6.51271 | -2.03729 | -0.42181 |
| H      | -7.56668 | -0.80008 | 0.248463 |
| C      | -6.44833 | -0.16074 | -1.50228 |
| H      | -7.22846 | -0.4431  | -2.21928 |

|   |          |          |          |
|---|----------|----------|----------|
| C | -4.97038 | -0.19252 | -1.96511 |
| H | -4.83845 | 0.078144 | -3.01405 |
| H | -4.40171 | -1.10695 | -1.77499 |
| C | -6.26587 | 1.367386 | -1.20582 |
| C | -6.4549  | 2.233384 | -2.46381 |
| H | -7.51517 | 2.273492 | -2.74252 |
| H | -6.12361 | 3.261868 | -2.27396 |
| H | -5.89971 | 1.864035 | -3.33043 |
| C | -7.10585 | 1.994244 | -0.08669 |
| H | -6.78611 | 3.023488 | 0.11742  |
| H | -8.15702 | 2.039575 | -0.39923 |
| H | -7.07675 | 1.444476 | 0.857541 |
| N | -0.52105 | -1.13241 | 0.12723  |
| H | -1.30175 | -0.4911  | 0.026042 |
| C | 0.698882 | -0.62603 | -0.20678 |
| O | 1.752605 | -1.26511 | -0.10129 |
| C | 0.66761  | 0.824709 | -0.74401 |
| H | -0.30292 | 1.262219 | -0.47976 |
| C | 0.741025 | 0.884265 | -2.31417 |
| C | 2.090286 | 0.380054 | -2.86165 |
| H | 2.280645 | -0.65919 | -2.57649 |
| H | 2.082818 | 0.43166  | -3.95715 |
| H | 2.929485 | 0.987061 | -2.50932 |
| C | 0.534375 | 2.351745 | -2.73872 |
| H | 0.583808 | 2.440058 | -3.83069 |
| H | -0.44696 | 2.723316 | -2.41682 |
| H | 1.298638 | 2.999018 | -2.30118 |
| C | -0.39321 | 0.028973 | -2.91546 |
| H | -0.41766 | 0.156936 | -4.00382 |
| H | -0.25855 | -1.03943 | -2.71411 |
| H | -1.37583 | 0.325094 | -2.52573 |
| N | 1.682912 | 1.643211 | -0.11863 |
| H | 2.63968  | 1.394381 | -0.36718 |
| C | 1.559115 | 2.064602 | 1.214408 |
| C | 0.458232 | 1.93386  | 1.983367 |

|   |          |          |          |
|---|----------|----------|----------|
| C | 2.813958 | 2.750327 | 1.724164 |
| C | 0.347665 | 2.477407 | 3.389426 |
| H | -0.42136 | 1.419538 | 1.604896 |
| C | 2.562511 | 3.600586 | 2.975482 |
| H | 3.576383 | 1.98595  | 1.933962 |
| H | 3.231458 | 3.367561 | 0.918719 |
| C | 1.713572 | 2.832131 | 3.993002 |
| H | -0.15988 | 1.742169 | 4.030381 |
| H | -0.29888 | 3.372056 | 3.404396 |
| H | 3.520491 | 3.905124 | 3.41524  |
| H | 2.037362 | 4.523531 | 2.691222 |
| H | 1.58318  | 3.417156 | 4.912359 |
| H | 2.238592 | 1.908342 | 4.273803 |
| C | 7.429198 | 0.727756 | -0.72564 |
| C | 8.810212 | 0.569424 | -0.80893 |
| C | 9.372495 | -0.70745 | -0.72758 |
| C | 8.550917 | -1.82526 | -0.56267 |
| C | 7.168178 | -1.67054 | -0.47887 |
| C | 6.601701 | -0.39093 | -0.5605  |
| H | 6.970006 | 1.708904 | -0.78604 |
| H | 9.448901 | 1.439097 | -0.93699 |
| H | 10.45044 | -0.83116 | -0.79248 |
| H | 8.988368 | -2.81788 | -0.49911 |
| H | 6.521773 | -2.53154 | -0.35045 |
| C | 5.128716 | -0.17679 | -0.47589 |
| O | 4.616262 | 0.936545 | -0.54265 |
| O | 4.435026 | -1.30324 | -0.32516 |
| H | 3.460152 | -1.10817 | -0.26546 |

**Table S4.** Cartesian coordinates (Angstroms) for I-A' in gas phase.

Point Group: C1

Imaginary Freq: 0

Total energy = -1872.6558 hartree

| Symbol | X        | Y        | Z        |
|--------|----------|----------|----------|
| C      | -0.91509 | -2.31679 | 0.807286 |
| C      | -2.28741 | -2.51931 | 1.11485  |

|   |          |          |          |
|---|----------|----------|----------|
| C | -2.66179 | -3.75332 | 1.676057 |
| C | -1.73398 | -4.75824 | 1.932111 |
| C | -0.39207 | -4.53312 | 1.622053 |
| C | 0.025005 | -3.32639 | 1.06387  |
| H | -3.70998 | -3.91331 | 1.912539 |
| H | -2.05004 | -5.70211 | 2.367047 |
| H | 0.348652 | -5.30489 | 1.815445 |
| H | 1.064602 | -3.15612 | 0.825607 |
| B | -3.40925 | -1.47049 | 0.878768 |
| O | -3.20372 | -0.21317 | 0.347117 |
| O | -4.72585 | -1.70772 | 1.174657 |
| C | -4.46843 | 0.518967 | 0.325311 |
| C | -5.51677 | -0.55962 | 0.807778 |
| H | -6.00536 | -0.2113  | 1.723782 |
| C | -4.29565 | 1.681905 | 1.302514 |
| H | -3.45573 | 2.309721 | 0.986837 |
| H | -5.18845 | 2.308361 | 1.358511 |
| H | -4.07692 | 1.302558 | 2.306779 |
| C | -4.73842 | 0.957438 | -1.12128 |
| H | -3.99677 | 1.702362 | -1.43374 |
| C | -6.59388 | -0.96459 | -0.2403  |
| H | -6.51795 | -2.04856 | -0.38001 |
| H | -7.5934  | -0.76945 | 0.165597 |
| C | -6.42195 | -0.25521 | -1.5916  |
| H | -7.17602 | -0.59504 | -2.31148 |
| C | -4.92909 | -0.30907 | -2.00161 |
| H | -4.76321 | -0.11404 | -3.06242 |
| H | -4.36229 | -1.20298 | -1.72708 |
| C | -6.2577  | 1.29188  | -1.40174 |
| C | -6.40865 | 2.062263 | -2.72536 |
| H | -7.45908 | 2.073472 | -3.04145 |
| H | -6.08967 | 3.104499 | -2.60045 |
| H | -5.82249 | 1.635006 | -3.54358 |
| C | -7.13822 | 1.992156 | -0.36005 |
| H | -6.8293  | 3.035235 | -0.21916 |



|   |          |          |          |
|---|----------|----------|----------|
| H | -8.17803 | 2.008881 | -0.71097 |
| H | -7.14025 | 1.511208 | 0.621458 |
| N | -0.54477 | -1.07458 | 0.242687 |
| H | -1.31889 | -0.43005 | 0.116646 |
| C | 0.671143 | -0.62382 | -0.1816  |
| O | 1.708028 | -1.29317 | -0.10021 |
| C | 0.654597 | 0.814579 | -0.74553 |
| H | -0.32751 | 1.244523 | -0.52637 |
| C | 0.779308 | 0.856736 | -2.31034 |
| C | 2.159988 | 0.388908 | -2.80833 |
| H | 2.366279 | -0.64592 | -2.51981 |
| H | 2.19255  | 0.444999 | -3.90321 |
| H | 2.967082 | 1.017544 | -2.42081 |
| C | 0.545234 | 2.312589 | -2.75861 |
| H | 0.641947 | 2.394963 | -3.8478  |
| H | -0.46175 | 2.655335 | -2.4862  |
| H | 1.269001 | 2.985107 | -2.29095 |
| C | -0.31048 | -0.04153 | -2.93016 |
| H | -0.30353 | 0.06044  | -4.02155 |
| H | -0.15212 | -1.10107 | -2.69915 |
| H | -1.31323 | 0.23504  | -2.57862 |
| N | 1.654252 | 1.647784 | -0.08929 |
| H | 2.602771 | 1.3024   | -0.23736 |
| C | 1.477762 | 2.094458 | 1.242833 |
| C | 2.507121 | 2.109219 | 2.111305 |
| C | 0.1287   | 2.692656 | 1.592713 |
| C | 2.469081 | 2.776583 | 3.46376  |
| H | 3.450494 | 1.660699 | 1.806081 |
| C | 0.002457 | 3.046693 | 3.083633 |
| H | -0.03139 | 3.586629 | 0.970104 |
| H | -0.68465 | 2.001313 | 1.33387  |
| C | 1.27152  | 3.725321 | 3.605098 |
| H | 3.405428 | 3.328248 | 3.630642 |
| H | 2.432474 | 2.017716 | 4.263623 |
| H | -0.87676 | 3.685936 | 3.23423  |

|   |          |          |          |
|---|----------|----------|----------|
| H | -0.17355 | 2.127924 | 3.660507 |
| H | 1.144629 | 4.032337 | 4.650973 |
| H | 1.458249 | 4.638967 | 3.023325 |
| C | 7.431869 | 0.506109 | -0.58982 |
| C | 8.807884 | 0.321077 | -0.69754 |
| C | 9.335552 | -0.97152 | -0.7604  |
| C | 8.484401 | -2.07841 | -0.71502 |
| C | 7.106569 | -1.89699 | -0.60694 |
| C | 6.574869 | -0.60155 | -0.54417 |
| H | 6.998852 | 1.499671 | -0.53928 |
| H | 9.469602 | 1.182233 | -0.7325  |
| H | 10.4096  | -1.11604 | -0.84448 |
| H | 8.89498  | -3.08331 | -0.76364 |
| H | 6.437345 | -2.74935 | -0.57049 |
| C | 5.108595 | -0.35792 | -0.42904 |
| O | 4.624467 | 0.767656 | -0.37314 |
| O | 4.383194 | -1.47585 | -0.39712 |
| H | 3.418528 | -1.25015 | -0.30647 |

**Table S5.** Cartesian coordinates (Angstroms) for **6a** in gas phase.

Point Group: C1

Imaginary Freq: 0

Total energy = -550.0714 hartree

| Symbol | X        | Y        | Z        |
|--------|----------|----------|----------|
| C      | 1.705107 | 0.22009  | -2.1E-05 |
| C      | 1.101116 | -1.04673 | 0.000034 |
| C      | -0.28321 | -1.15924 | 0.000031 |
| C      | -1.04631 | 0.010139 | -5E-06   |
| C      | -0.47394 | 1.280261 | -5.1E-05 |
| C      | 0.914902 | 1.376822 | -6.9E-05 |
| H      | 1.73579  | -1.927   | 0.000081 |
| H      | -0.78105 | -2.12095 | 0.000049 |
| H      | -1.11183 | 2.155192 | -6.2E-05 |
| H      | 1.389592 | 2.355022 | -0.00013 |
| N      | -2.51864 | -0.10282 | 0.000003 |
| C      | 3.18703  | 0.33683  | -1.9E-05 |

|   |          |          |          |
|---|----------|----------|----------|
| H | 3.572977 | 1.37923  | -0.0001  |
| O | 3.945275 | -0.61132 | 0.000062 |
| O | -3.00166 | -1.23338 | -0.00014 |
| O | -3.16901 | 0.940845 | 0.000166 |
